# Supplementary material for: Mechanistic insight into B(C6F5)3 catalyzed imine reduction with PhSiH3 under stoichiometric water conditions
Source: Royal Society of Chemistry journal article supplement (doi:10.1039/d1ra02399c), 2021-01-01
Supplement: d1ra02399c1.pdf [file d1ra02399c1.pdf]

## Supplementary Information

### Contents:

1. Table S1. The Gibbs free energy changes of some binary and ternary adducts relative to corresponding single molecules.
2. Figure S1. The Gibbs free energy profile of Path A in chloroform.
3. Figure S2. The optimized structures of reactants and products at B3LYP/6-311G(d,p) level in gas phase with corresponding bond lengths in angstroms.
4. Figure S3. The optimized structures of stationary points of N-silicon amine forming steps (B-I' and B-I) in Path B.
5. Figure S4. The optimized structures of stationary points of hydrolysis for desilylation steps (B-II) in Path B.
6. Optimized Cartesian coordinates of the stationary points

### 1. Table S1

Table S1. The Gibbs free energy changes of some binary and ternary adducts relative to corresponding single molecules.

| Process                                                                                                                                                                                                              | $\Delta G$ /kcal·mol <sup>-1</sup> |
|----------------------------------------------------------------------------------------------------------------------------------------------------------------------------------------------------------------------|------------------------------------|
| <b>B(C<sub>6</sub>F<sub>5</sub>)<sub>3</sub>+PhHC=NPh→PhHC=PhN---B(C<sub>6</sub>F<sub>5</sub>)<sub>3</sub> (IM0)</b>                                                                                                 | -5.2                               |
| B(C <sub>6</sub> F <sub>5</sub> ) <sub>3</sub> +H <sub>2</sub> O→H <sub>2</sub> O---B(C <sub>6</sub> F <sub>5</sub> ) <sub>3</sub>                                                                                   | -3.8                               |
| B(C <sub>6</sub> F <sub>5</sub> ) <sub>3</sub> +SiH <sub>3</sub> Ph→PhH <sub>2</sub> SiH---B(C <sub>6</sub> F <sub>5</sub> ) <sub>3</sub>                                                                            | 1.1                                |
| B(C <sub>6</sub> F <sub>5</sub> ) <sub>3</sub> +PhH <sub>2</sub> C-NHPh→PhH <sub>2</sub> C-N(Ph)(H)---B(C <sub>6</sub> F <sub>5</sub> ) <sub>3</sub>                                                                 | -2.8                               |
| B(C <sub>6</sub> F <sub>5</sub> ) <sub>3</sub> +PhH <sub>2</sub> C-N(SiH <sub>2</sub> Ph)Ph→PhH <sub>2</sub> C-N(Ph)SiH <sub>2</sub> ---B(C <sub>6</sub> F <sub>5</sub> ) <sub>3</sub>                               | 1.4                                |
| <b>B(C<sub>6</sub>F<sub>5</sub>)<sub>3</sub>+H<sub>2</sub>O+PhHC=NPh→(C<sub>6</sub>F<sub>5</sub>)<sub>3</sub>B---O(H)-H---NPh=CHPh (IM1)</b>                                                                         | -14.4                              |
| <b>B(C<sub>6</sub>F<sub>5</sub>)<sub>3</sub>+H<sub>2</sub>O+PhH<sub>2</sub>C-NHPh→(C<sub>6</sub>F<sub>5</sub>)<sub>3</sub>B---O(H)-H---N(H)(Ph)-CH<sub>2</sub>Ph (IM2)</b>                                           | -14.4                              |
| B(C <sub>6</sub> F <sub>5</sub> ) <sub>3</sub> +2H <sub>2</sub> O→(C <sub>6</sub> F <sub>5</sub> ) <sub>3</sub> B---O(H)H---OH <sub>2</sub>                                                                          | -8.7                               |
| B(C <sub>6</sub> F <sub>5</sub> ) <sub>3</sub> +H <sub>2</sub> O+PhH <sub>2</sub> C-N(SiH <sub>2</sub> Ph)Ph→(C <sub>6</sub> F <sub>5</sub> ) <sub>3</sub> B---O(H)-H---N(SiH <sub>2</sub> Ph)Ph(CH <sub>2</sub> Ph) | -7.6                               |
| B(C <sub>6</sub> F <sub>5</sub> ) <sub>3</sub> +H <sub>2</sub> O+SiH <sub>3</sub> Ph→(C <sub>6</sub> F <sub>5</sub> ) <sub>3</sub> B---O(H)-H---HSiH <sub>2</sub> Ph                                                 | -0.5                               |
| B(C <sub>6</sub> F <sub>5</sub> ) <sub>3</sub> +PhHC=NPh+H <sub>2</sub> O→(C <sub>6</sub> F <sub>5</sub> ) <sub>3</sub> B---NPh=CHPh---H <sub>2</sub> O                                                              | -2.9                               |
| B(C <sub>6</sub> F <sub>5</sub> ) <sub>3</sub> +SiH <sub>3</sub> Ph+H <sub>2</sub> O→(C <sub>6</sub> F <sub>5</sub> ) <sub>3</sub> B---H-Si(H <sub>2</sub> Ph)---OH <sub>2</sub>                                     | 5.0                                |
| B(C <sub>6</sub> F <sub>5</sub> ) <sub>3</sub> +SiH <sub>3</sub> Ph+PhHC=NPh→(C <sub>6</sub> F <sub>5</sub> ) <sub>3</sub> B---H-Si(H <sub>2</sub> Ph)---NPh=CHPh                                                    | 6.2                                |
| H <sub>2</sub> O+SiH <sub>3</sub> Ph→H <sub>2</sub> O---SiH <sub>3</sub> Ph                                                                                                                                          | 2.0                                |
| SiH <sub>3</sub> Ph+PhH <sub>2</sub> C-NHPh→PhH <sub>3</sub> Si---NHPh-CH <sub>2</sub> Ph                                                                                                                            | 3.0                                |

### 2. Figure S1

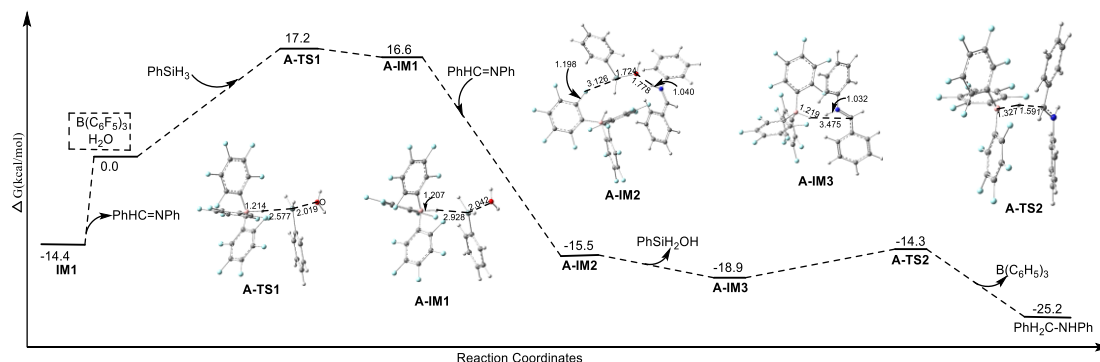

Figure S1. The Gibbs free energy profile of Path A in chloroform (unit: kcal/mol; with interatomic distances in angstroms).

### 3. Figure S2

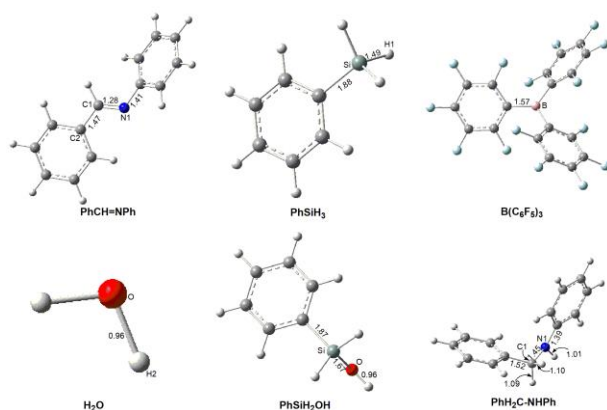

Figure S2. The opted geometries of reactants and products at B3LYP/6-311G(d,p) level in gas phase with corresponding bond lengths in angstroms.

### 4. Figure S3

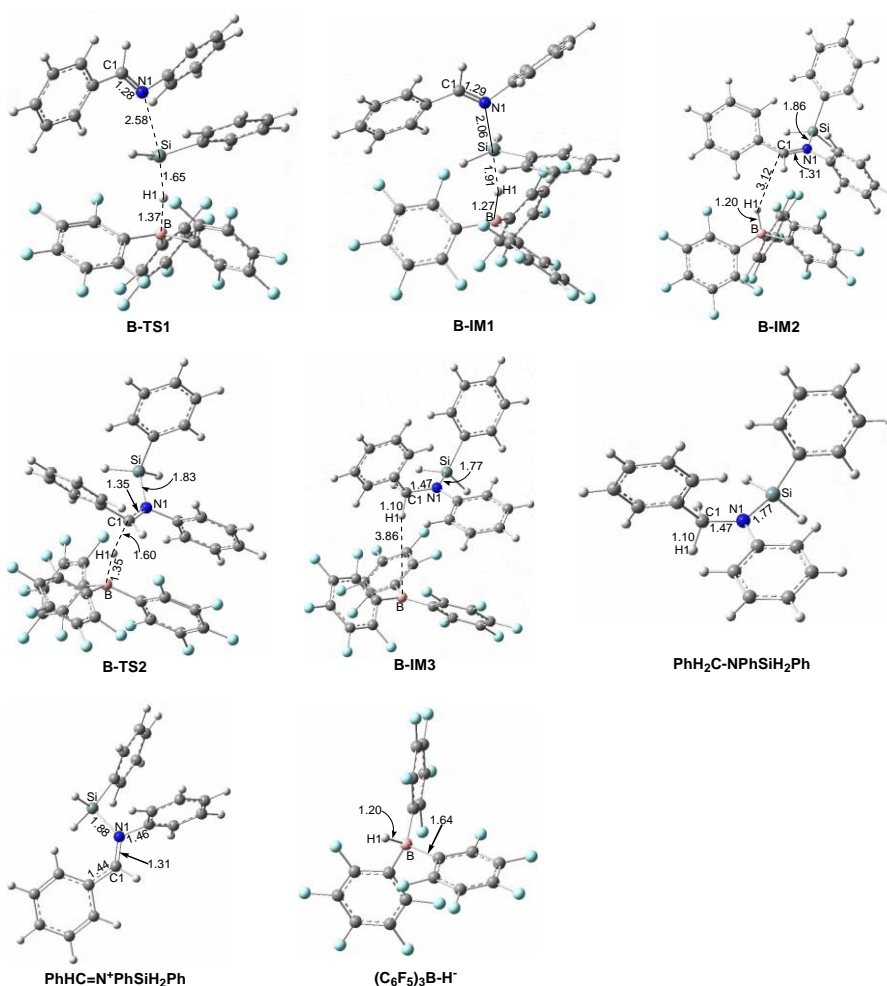

Figure S3. The opted geometries of stationary points of N-silicon amine forming steps (B-I' and B-I) at B3LYP/6-311G(d,p) level in gas phase with corresponding interatomic distances in angstroms.

### 5. Figure S4

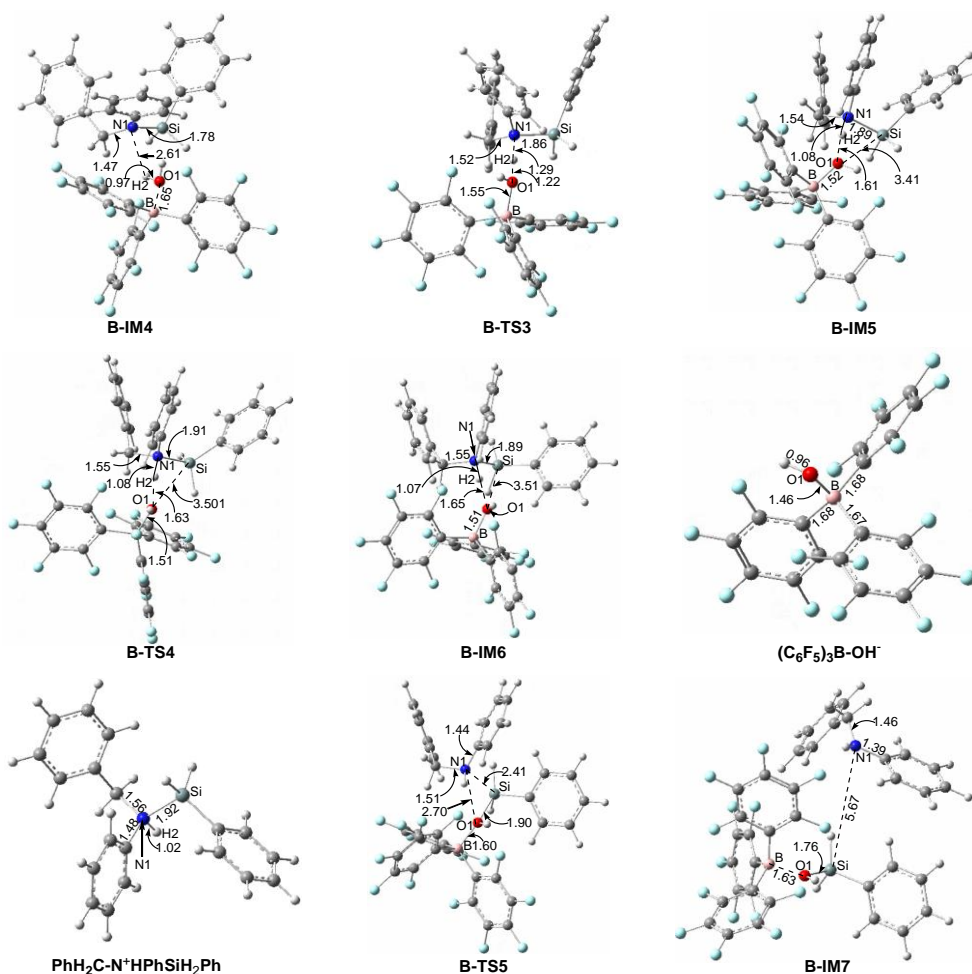

Figure S4. The opted geometries of stationary points of hydrolysis for desilylation steps (B-II) at B3LYP/6-311G(d,p) level in gas phase with corresponding interatomic distances in angstroms.

## 6. Optimized Cartesian coordinates of the stationary points

The following is the optimized Cartesian coordinates and the sum of electronic and thermal Gibbs free energies of the stationary points at B3LYP/6-311G(d,p) level in gas phase.

$(\text{C}_6\text{F}_5)_3\text{B}---\text{NPh}=\text{CHPh}$  (IM0)

Sum of electronic and thermal Free Energies= -2765.463939 Hartree/Particle

|   |           |           |           |
|---|-----------|-----------|-----------|
| C | -0.198104 | 2.653424  | 0.472472  |
| C | -0.226915 | 1.543467  | -0.366988 |
| C | -0.542663 | 1.845192  | -1.695757 |
| C | -0.797492 | 3.125354  | -2.163416 |
| C | -0.751116 | 4.195710  | -1.279375 |
| C | -0.448037 | 3.955407  | 0.050633  |
| N | -0.070933 | -0.052797 | 0.047425  |
| C | 1.263318  | -0.804636 | -0.587784 |
| C | 1.585817  | -2.106305 | -0.196078 |
| C | 2.662497  | -2.834493 | -0.675661 |

|   |           |           |           |
|---|-----------|-----------|-----------|
| C | 3.505054  | -2.256721 | -1.614991 |
| C | 3.247120  | -0.963248 | -2.035834 |
| C | 2.155327  | -0.271099 | -1.519132 |
| F | 0.804921  | -2.751721 | 0.703094  |
| F | 2.889913  | -4.083577 | -0.250358 |
| F | 4.552032  | -2.932799 | -2.093809 |
| F | 4.066615  | -0.372672 | -2.914966 |
| F | 2.050859  | 1.005207  | -1.947094 |
| F | -0.601060 | 0.855837  | -2.608811 |
| F | -1.084044 | 3.339440  | -3.452643 |
| F | -0.991260 | 5.438151  | -1.706811 |
| F | -0.398511 | 4.972815  | 0.921266  |
| F | 0.086341  | 2.525443  | 1.794349  |
| C | -1.505960 | -0.753619 | -0.416589 |
| C | -2.721479 | -0.152963 | -0.065516 |
| C | -3.969323 | -0.611801 | -0.461865 |
| C | -4.053316 | -1.730342 | -1.277455 |
| C | -2.883631 | -2.355335 | -1.677391 |
| C | -1.652145 | -1.862485 | -1.254727 |
| F | -2.734458 | 0.949556  | 0.714712  |
| F | -5.085537 | 0.014476  | -0.068326 |
| F | -5.241392 | -2.193371 | -1.673974 |
| F | -2.943831 | -3.427858 | -2.476893 |
| F | -0.588470 | -2.535207 | -1.733945 |
| N | 0.082321  | -0.227510 | 1.705716  |
| C | 1.155888  | -0.104185 | 2.427843  |
| C | -1.072223 | -0.625498 | 2.516773  |
| C | -1.569931 | -1.926402 | 2.466881  |
| C | -1.626427 | 0.314022  | 3.385312  |
| C | -2.632559 | -2.280437 | 3.294439  |
| H | -1.126382 | -2.651507 | 1.801899  |
| C | -2.692380 | -0.050507 | 4.203914  |
| H | -1.242696 | 1.325549  | 3.393523  |
| C | -3.198055 | -1.346598 | 4.160249  |
| H | -3.015441 | -3.293710 | 3.260661  |
| H | -3.127883 | 0.684560  | 4.870415  |
| H | -4.028221 | -1.628738 | 4.797135  |
| H | 1.035104  | -0.425509 | 3.460116  |
| C | 2.504937  | 0.369166  | 2.151419  |
| C | 3.481108  | -0.058708 | 3.074640  |
| C | 2.891127  | 1.244239  | 1.121940  |
| C | 4.806602  | 0.329280  | 2.944069  |
| H | 3.191260  | -0.710382 | 3.891787  |
| C | 4.214193  | 1.648623  | 1.009277  |

|   |          |           |          |
|---|----------|-----------|----------|
| H | 2.165874 | 1.627313  | 0.423407 |
| C | 5.175186 | 1.186284  | 1.908394 |
| H | 5.546388 | -0.023515 | 3.652365 |
| H | 4.495965 | 2.327184  | 0.213182 |
| H | 6.206904 | 1.503094  | 1.808086 |

(C<sub>6</sub>F<sub>5</sub>)<sub>3</sub>B---OH<sub>2</sub>

Sum of electronic and thermal Free Energies= -2285.211959 Hartree/Particle

|   |           |           |           |
|---|-----------|-----------|-----------|
| C | 1.546679  | -2.097884 | 1.023462  |
| C | 1.237981  | -0.960165 | 0.287209  |
| C | 2.058362  | -0.749764 | -0.820834 |
| C | 3.108418  | -1.594794 | -1.160211 |
| C | 3.376917  | -2.710082 | -0.377021 |
| C | 2.584237  | -2.969710 | 0.732974  |
| B | -0.011343 | 0.016734  | 0.654474  |
| C | -1.472649 | -0.606505 | 0.278037  |
| C | -2.621599 | -0.285590 | 0.995223  |
| C | -3.890992 | -0.758845 | 0.707570  |
| C | -4.051280 | -1.611770 | -0.377399 |
| C | -2.944196 | -1.958976 | -1.139508 |
| C | -1.690333 | -1.457871 | -0.804767 |
| F | -2.531515 | 0.575327  | 2.063313  |
| F | -4.944158 | -0.408066 | 1.450500  |
| F | -5.257439 | -2.088568 | -0.683586 |
| F | -3.091898 | -2.770773 | -2.189217 |
| F | -0.674500 | -1.816835 | -1.608783 |
| F | 1.838285  | 0.290211  | -1.642276 |
| F | 3.859740  | -1.346305 | -2.235737 |
| F | 4.383372  | -3.526496 | -0.689080 |
| F | 2.823052  | -4.038087 | 1.498923  |
| F | 0.790412  | -2.415119 | 2.128655  |
| O | 0.017062  | 0.053357  | 2.329948  |
| C | 0.207172  | 1.578178  | 0.290009  |
| C | 1.305650  | 2.267190  | 0.811915  |
| C | 1.566773  | 3.603695  | 0.546734  |
| C | 0.709935  | 4.309671  | -0.288659 |
| C | -0.387390 | 3.666398  | -0.842507 |
| C | -0.618053 | 2.326805  | -0.548250 |
| F | 2.185995  | 1.626686  | 1.605720  |
| F | 2.631775  | 4.213700  | 1.078292  |
| F | 0.942972  | 5.594876  | -0.557769 |
| F | -1.213351 | 4.337333  | -1.652425 |
| F | -1.693702 | 1.770806  | -1.137895 |
| H | 0.152800  | -0.843023 | 2.685812  |

|   |           |          |          |
|---|-----------|----------|----------|
| H | -0.827755 | 0.404386 | 2.660657 |
|---|-----------|----------|----------|

PhH<sub>2</sub>SiH---B(C<sub>6</sub>F<sub>5</sub>)<sub>3</sub>

Sum of electronic and thermal Free Energies= -2731.699548 Hartree/Particle

|    |           |           |           |
|----|-----------|-----------|-----------|
| C  | 0.191763  | 2.370353  | -0.228295 |
| C  | 1.185672  | 1.544533  | 0.305032  |
| C  | 2.329143  | 2.197581  | 0.776281  |
| C  | 2.478462  | 3.576047  | 0.737413  |
| C  | 1.464967  | 4.354599  | 0.189055  |
| C  | 0.314526  | 3.748955  | -0.304001 |
| B  | 1.024548  | -0.015427 | 0.370244  |
| C  | -0.350808 | -0.637437 | 0.784817  |
| C  | -0.872278 | -1.775969 | 0.159054  |
| C  | -2.096631 | -2.327891 | 0.500330  |
| C  | -2.836057 | -1.756529 | 1.529276  |
| C  | -2.359474 | -0.626176 | 2.182369  |
| C  | -1.142900 | -0.084443 | 1.797858  |
| F  | -0.201157 | -2.357838 | -0.848194 |
| F  | -2.574178 | -3.392461 | -0.149382 |
| F  | -4.001872 | -2.287117 | 1.885302  |
| F  | -3.076646 | -0.074901 | 3.164876  |
| F  | -0.720371 | 1.001044  | 2.467538  |
| F  | 3.330478  | 1.489986  | 1.323502  |
| F  | 3.578452  | 4.160681  | 1.217421  |
| F  | 1.596504  | 5.677124  | 0.135423  |
| F  | -0.655395 | 4.495121  | -0.839412 |
| F  | -0.934503 | 1.831976  | -0.728964 |
| C  | 2.238681  | -0.940824 | 0.017622  |
| C  | 3.130034  | -0.636904 | -1.018332 |
| C  | 4.203706  | -1.449092 | -1.350626 |
| C  | 4.430941  | -2.608160 | -0.616968 |
| C  | 3.579660  | -2.946701 | 0.429093  |
| C  | 2.502868  | -2.122947 | 0.719815  |
| F  | 2.948513  | 0.464521  | -1.763777 |
| F  | 5.017552  | -1.131994 | -2.360285 |
| F  | 5.462277  | -3.392788 | -0.915494 |
| F  | 3.806713  | -4.055153 | 1.137723  |
| F  | 1.718520  | -2.488538 | 1.745647  |
| H  | -1.564846 | -0.633033 | -2.955076 |
| Si | -2.859348 | -0.025667 | -3.366422 |
| H  | -3.418216 | -0.850259 | -4.469064 |
| H  | -2.591021 | 1.350116  | -3.857113 |
| C  | -4.076651 | 0.024302  | -1.931379 |
| C  | -4.920860 | -1.066708 | -1.667864 |

|   |           |           |           |
|---|-----------|-----------|-----------|
| C | -4.152455 | 1.138113  | -1.080054 |
| C | -5.802095 | -1.050361 | -0.589142 |
| H | -4.894445 | -1.940596 | -2.311319 |
| C | -5.032757 | 1.156861  | 0.000520  |
| H | -3.515746 | 1.998654  | -1.255341 |
| C | -5.858073 | 0.061959  | 0.248448  |
| H | -6.441857 | -1.905076 | -0.400825 |
| H | -5.075743 | 2.026279  | 0.647325  |
| H | -6.540270 | 0.074424  | 1.090867  |

PhH<sub>2</sub>C-(H) (Ph)N---B(C<sub>6</sub>F<sub>5</sub>)<sub>3</sub>

Sum of electronic and thermal Free Energies= -2766.656916 Hartree/Particle

|   |           |           |           |
|---|-----------|-----------|-----------|
| C | 1.672938  | -0.279484 | 2.374638  |
| C | 1.528582  | -0.490168 | 1.009606  |
| C | 2.667553  | -1.035764 | 0.404243  |
| C | 3.826945  | -1.376433 | 1.082540  |
| C | 3.901706  | -1.161878 | 2.452893  |
| C | 2.811957  | -0.608079 | 3.103045  |
| B | 0.307618  | -0.068226 | -0.009340 |
| C | -0.311584 | -1.333452 | -0.873131 |
| C | -1.272689 | -1.117839 | -1.861850 |
| C | -1.867980 | -2.106067 | -2.624377 |
| C | -1.512731 | -3.429331 | -2.398363 |
| C | -0.591005 | -3.715938 | -1.404812 |
| C | -0.027830 | -2.683018 | -0.659027 |
| F | -1.713993 | 0.153224  | -2.096289 |
| F | -2.785254 | -1.803570 | -3.551074 |
| F | -2.068046 | -4.409716 | -3.113577 |
| F | -0.260953 | -4.987834 | -1.152990 |
| F | 0.806680  | -3.079854 | 0.319636  |
| F | 2.665719  | -1.268731 | -0.924563 |
| F | 4.869071  | -1.906567 | 0.432928  |
| F | 5.006665  | -1.482859 | 3.130155  |
| F | 2.860780  | -0.381786 | 4.422151  |
| F | 0.674593  | 0.282234  | 3.104171  |
| C | 0.948590  | 1.165352  | -0.931347 |
| C | 1.546137  | 2.276211  | -0.319941 |
| C | 2.181938  | 3.310006  | -0.994074 |
| C | 2.287655  | 3.253783  | -2.375057 |
| C | 1.765549  | 2.154918  | -3.037671 |
| C | 1.131366  | 1.143525  | -2.321350 |
| F | 1.554566  | 2.394565  | 1.030727  |
| F | 2.701963  | 4.343893  | -0.322354 |
| F | 2.894122  | 4.231044  | -3.050247 |

|   |           |           |           |
|---|-----------|-----------|-----------|
| F | 1.887374  | 2.064028  | -4.366405 |
| F | 0.735199  | 0.103231  | -3.072845 |
| N | -1.186510 | 0.527660  | 0.686954  |
| H | -1.600543 | 0.835758  | -0.194245 |
| C | -1.275660 | 1.780277  | 1.569702  |
| H | -0.469489 | 2.437290  | 1.270861  |
| H | -1.091768 | 1.465880  | 2.590165  |
| C | -2.119924 | -0.509070 | 1.187470  |
| C | -1.778975 | -1.327567 | 2.260106  |
| C | -3.368849 | -0.632435 | 0.580723  |
| C | -2.691669 | -2.276790 | 2.715349  |
| H | -0.820874 | -1.230546 | 2.744404  |
| C | -4.274089 | -1.585233 | 1.040081  |
| H | -3.636041 | 0.008194  | -0.251384 |
| C | -3.937800 | -2.411097 | 2.108987  |
| H | -2.418218 | -2.916330 | 3.546251  |
| H | -5.240774 | -1.677053 | 0.559357  |
| H | -4.640721 | -3.154468 | 2.466003  |
| C | -2.603292 | 2.483735  | 1.430853  |
| C | -3.595825 | 2.352512  | 2.406042  |
| C | -2.850433 | 3.300896  | 0.321061  |
| C | -4.812332 | 3.017357  | 2.272678  |
| H | -3.414439 | 1.727017  | 3.273164  |
| C | -4.068879 | 3.959519  | 0.181077  |
| H | -2.080592 | 3.433439  | -0.433548 |
| C | -5.052568 | 3.818165  | 1.158374  |
| H | -5.571743 | 2.909897  | 3.038627  |
| H | -4.245334 | 4.591013  | -0.681999 |
| H | -5.999172 | 4.336022  | 1.054749  |

PhH<sub>2</sub>C-N(Ph)SiPhH<sub>2</sub>---B(C<sub>6</sub>F<sub>5</sub>)<sub>3</sub>

Sum of electronic and thermal Free Energies= -3288.429081 Hartree/Particle

|   |           |           |           |
|---|-----------|-----------|-----------|
| C | -2.488311 | -2.975943 | 0.158586  |
| C | -2.370826 | -1.683989 | -0.368654 |
| C | -2.259783 | -1.604327 | -1.762503 |
| C | -2.249381 | -2.722266 | -2.582322 |
| C | -2.379829 | -3.983738 | -2.011872 |
| C | -2.505870 | -4.113802 | -0.633090 |
| B | -2.353706 | -0.412347 | 0.543499  |
| C | -3.065020 | 0.905425  | 0.078594  |
| C | -2.501313 | 2.168255  | 0.289750  |
| C | -3.095073 | 3.342281  | -0.146261 |
| C | -4.324733 | 3.282801  | -0.792207 |
| C | -4.935975 | 2.052019  | -1.005930 |



|    |           |           |           |
|----|-----------|-----------|-----------|
| C  | -4.298363 | 0.895436  | -0.582576 |
| F  | -1.308118 | 2.284394  | 0.898485  |
| F  | -2.497253 | 4.522171  | 0.043405  |
| F  | -4.914996 | 4.400346  | -1.205199 |
| F  | -6.121687 | 1.997180  | -1.616253 |
| F  | -4.930913 | -0.266314 | -0.809215 |
| F  | -2.119446 | -0.411593 | -2.361756 |
| F  | -2.118891 | -2.601873 | -3.904681 |
| F  | -2.384961 | -5.065418 | -2.784351 |
| F  | -2.641172 | -5.325670 | -0.089810 |
| F  | -2.623170 | -3.154394 | 1.482562  |
| C  | -1.610464 | -0.446579 | 1.925174  |
| C  | -2.139263 | 0.153824  | 3.072253  |
| C  | -1.488091 | 0.143265  | 4.297231  |
| C  | -0.241349 | -0.464261 | 4.398879  |
| C  | 0.325707  | -1.068503 | 3.282647  |
| C  | -0.365255 | -1.063436 | 2.081398  |
| F  | -3.340699 | 0.751002  | 3.025046  |
| F  | 0.236928  | -1.645489 | 1.031348  |
| F  | 1.535752  | -1.633798 | 3.373371  |
| F  | 0.406136  | -0.468415 | 5.560271  |
| F  | -2.038954 | 0.712334  | 5.371640  |
| H  | 2.841586  | 1.362271  | 0.596146  |
| C  | 3.208257  | 0.342105  | 0.430891  |
| N  | 2.995331  | 0.036465  | -0.993005 |
| Si | 1.751777  | 0.993630  | -1.787350 |
| C  | 3.364854  | -1.257788 | -1.454882 |
| C  | 3.386165  | -2.375693 | -0.607546 |
| C  | 3.755823  | -3.627698 | -1.092912 |
| C  | 4.103746  | -3.800859 | -2.429216 |
| C  | 4.090554  | -2.694932 | -3.277375 |
| C  | 3.739494  | -1.439158 | -2.795887 |
| H  | 3.109339  | -2.276136 | 0.433258  |
| H  | 3.767229  | -4.474179 | -0.414790 |
| H  | 4.390146  | -4.777273 | -2.802032 |
| H  | 4.373771  | -2.804269 | -4.318622 |
| H  | 3.765889  | -0.583673 | -3.459941 |
| C  | 2.199728  | 2.817761  | -1.821148 |
| C  | 1.362017  | 3.773228  | -1.225270 |
| C  | 1.668456  | 5.132465  | -1.277729 |
| C  | 2.821925  | 5.560812  | -1.928961 |
| C  | 3.668862  | 4.627645  | -2.526529 |
| C  | 3.359671  | 3.271898  | -2.471325 |
| H  | 0.462882  | 3.456426  | -0.707019 |

|   |          |           |           |
|---|----------|-----------|-----------|
| H | 1.007583 | 5.853246  | -0.809036 |
| H | 3.062610 | 6.617345  | -1.970747 |
| H | 4.568502 | 4.958032  | -3.034067 |
| H | 4.030363 | 2.559977  | -2.942748 |
| H | 2.601085 | -0.302987 | 1.077531  |
| C | 4.655075 | 0.283485  | 0.890338  |
| C | 4.962887 | -0.217612 | 2.157306  |
| C | 5.690518 | 0.772343  | 0.089941  |
| C | 6.276709 | -0.222223 | 2.622072  |
| H | 4.168520 | -0.611024 | 2.784311  |
| C | 7.004133 | 0.764838  | 0.549822  |
| H | 5.460606 | 1.151908  | -0.898357 |
| C | 7.302019 | 0.269330  | 1.818455  |
| H | 6.498691 | -0.617428 | 3.607240  |
| H | 7.798160 | 1.145418  | -0.083371 |
| H | 8.326041 | 0.261750  | 2.174710  |
| H | 1.575596 | 0.448648  | -3.151551 |
| H | 0.454559 | 0.898945  | -1.053096 |

**(C<sub>6</sub>F<sub>5</sub>)<sub>3</sub>B---O(H)-H---NPh=CHPh (IM1)**

Sum of electronic and thermal Free Energies=-2841.936214 Hartree/Particle

|   |           |           |           |
|---|-----------|-----------|-----------|
| N | -0.745537 | -0.344597 | 0.017848  |
| C | -1.723438 | -1.338669 | -0.835760 |
| C | -3.106663 | -1.425313 | -0.684540 |
| C | -1.194219 | -2.179995 | -1.817025 |
| C | -3.911269 | -2.260234 | -1.455050 |
| C | -1.958047 | -3.022787 | -2.609555 |
| C | -3.334625 | -3.060955 | -2.428211 |
| C | -1.558240 | 0.858362  | 0.788893  |
| C | -2.016177 | 1.993896  | 0.131705  |
| C | -1.871603 | 0.818729  | 2.147091  |
| C | -2.681479 | 3.044324  | 0.745326  |
| C | -2.549437 | 1.837435  | 2.806967  |
| C | -2.949117 | 2.966322  | 2.104294  |
| C | 0.349464  | -1.068614 | 0.985287  |
| C | 0.378790  | -2.426562 | 1.300033  |
| C | 1.347684  | -0.310770 | 1.595899  |
| C | 1.339818  | -2.994950 | 2.130029  |
| C | 2.330961  | -0.835782 | 2.419874  |
| C | 2.327484  | -2.197051 | 2.688599  |
| F | -2.817228 | 1.742854  | 4.113484  |
| F | -3.585923 | 3.961908  | 2.725569  |
| F | -3.047242 | 4.129828  | 0.046416  |
| F | -1.821317 | 2.126024  | -1.220045 |

|   |           |           |           |
|---|-----------|-----------|-----------|
| F | -1.542590 | -0.252284 | 2.892316  |
| F | -1.384572 | -3.804313 | -3.534280 |
| F | -4.091355 | -3.865615 | -3.178954 |
| F | 0.142203  | -2.231856 | -2.014488 |
| F | -3.753626 | -0.694377 | 0.245583  |
| F | -5.236034 | -2.293336 | -1.264686 |
| F | 1.393491  | 1.030253  | 1.392450  |
| F | 3.280741  | -0.049080 | 2.944435  |
| F | 3.263706  | -2.731771 | 3.476924  |
| F | 1.321279  | -4.307356 | 2.392507  |
| F | -0.550797 | -3.272380 | 0.820019  |
| O | 0.144056  | 0.367516  | -1.129565 |
| H | 1.153850  | 0.632098  | -1.087810 |
| H | -0.352706 | 1.039892  | -1.616060 |
| N | 2.687631  | 1.005335  | -1.264728 |
| C | 3.162141  | 2.145007  | -1.618571 |
| C | 3.586176  | -0.082584 | -1.078692 |
| C | 4.756758  | 0.063629  | -0.324934 |
| C | 3.259662  | -1.327764 | -1.626166 |
| C | 5.606809  | -1.024228 | -0.146858 |
| H | 4.970999  | 1.009980  | 0.157446  |
| C | 4.122702  | -2.404282 | -1.453638 |
| H | 2.342266  | -1.441782 | -2.188041 |
| C | 5.297273  | -2.257358 | -0.715993 |
| H | 6.503296  | -0.909658 | 0.451274  |
| H | 3.870017  | -3.363765 | -1.889421 |
| H | 5.958427  | -3.103726 | -0.572029 |
| H | 4.225065  | 2.224945  | -1.864668 |
| C | 2.381551  | 3.373422  | -1.764698 |
| C | 2.871309  | 4.373711  | -2.618838 |
| C | 1.175324  | 3.589437  | -1.079728 |
| C | 2.147937  | 5.542978  | -2.822085 |
| H | 3.814142  | 4.223088  | -3.134082 |
| C | 0.456620  | 4.761068  | -1.282130 |
| H | 0.834280  | 2.860258  | -0.357086 |
| C | 0.936565  | 5.734387  | -2.159536 |
| H | 2.527885  | 6.304381  | -3.492964 |
| H | -0.478567 | 4.918106  | -0.758269 |
| H | 0.371952  | 6.646349  | -2.315092 |

**(C<sub>6</sub>F<sub>5</sub>)<sub>3</sub>B---O(H)-H--- NPh(CH<sub>2</sub>Ph) (IM2)**

Sum of electronic and thermal Free Energies=-2843.125234 Hartree/Particle

|   |           |          |          |
|---|-----------|----------|----------|
| C | -3.407605 | 0.309545 | 1.901759 |
| N | -2.498389 | 1.337037 | 1.307657 |

|   |           |           |           |
|---|-----------|-----------|-----------|
| C | -2.419770 | 2.609473  | 1.962599  |
| C | -2.208976 | 3.758656  | 1.190321  |
| C | -2.059841 | 4.997234  | 1.806093  |
| C | -2.119455 | 5.106980  | 3.194176  |
| C | -2.325647 | 3.963297  | 3.960556  |
| C | -2.472303 | 2.716948  | 3.355038  |
| H | -2.877770 | -0.205522 | 2.702491  |
| H | -2.159938 | 3.679990  | 0.108825  |
| H | -1.902780 | 5.878826  | 1.195376  |
| H | -2.006343 | 6.072695  | 3.671740  |
| H | -2.370131 | 4.034672  | 5.041233  |
| H | -2.617352 | 1.836233  | 3.967697  |
| H | -2.765816 | 1.475737  | 0.337019  |
| H | -4.277484 | 0.812818  | 2.338626  |
| C | -3.856346 | -0.677563 | 0.848722  |
| C | -3.316353 | -1.964428 | 0.783210  |
| C | -4.819941 | -0.300006 | -0.094899 |
| C | -3.719364 | -2.851499 | -0.213214 |
| H | -2.576510 | -2.268810 | 1.513250  |
| C | -5.220959 | -1.183800 | -1.093240 |
| H | -5.269544 | 0.687514  | -0.041494 |
| C | -4.667508 | -2.461790 | -1.155757 |
| H | -3.284649 | -3.842971 | -0.257603 |
| H | -5.966821 | -0.878109 | -1.817947 |
| H | -4.973365 | -3.148934 | -1.935620 |
| O | 0.158603  | 0.975599  | 1.069423  |
| B | 0.850724  | -0.004693 | -0.021373 |
| C | 2.271551  | 0.743572  | -0.336278 |
| C | 3.119374  | 1.104398  | 0.714403  |
| C | 2.769704  | 1.013457  | -1.611085 |
| C | 4.357733  | 1.707102  | 0.531941  |
| C | 4.003819  | 1.612036  | -1.836071 |
| C | 4.802523  | 1.964756  | -0.757197 |
| C | -0.213434 | -0.038319 | -1.265957 |
| C | -0.740939 | -1.180566 | -1.863549 |
| C | -0.704249 | 1.160182  | -1.783102 |
| C | -1.681138 | -1.138515 | -2.890108 |
| C | -1.645583 | 1.252660  | -2.794195 |
| C | -2.142726 | 0.082429  | -3.355392 |
| C | 1.097546  | -1.431716 | 0.725817  |
| C | 0.412715  | -1.872670 | 1.851612  |
| C | 2.056324  | -2.323092 | 0.244242  |
| C | 0.652455  | -3.090046 | 2.476164  |
| C | 2.336086  | -3.546573 | 0.837566  |

|   |           |           |           |
|---|-----------|-----------|-----------|
| C | 1.628991  | -3.933640 | 1.968648  |
| H | 0.369935  | 1.895044  | 0.858478  |
| F | 5.121304  | 2.036558  | 1.580778  |
| F | 5.988248  | 2.544183  | -0.957597 |
| F | 4.429490  | 1.849043  | -3.082377 |
| F | 2.752632  | 0.865559  | 1.990756  |
| F | 2.070048  | 0.678999  | -2.711205 |
| F | -0.257555 | 2.342817  | -1.269914 |
| F | -2.088480 | 2.445201  | -3.216863 |
| F | -3.063560 | 0.136148  | -4.320345 |
| F | -2.164058 | -2.271388 | -3.412424 |
| F | -0.372137 | -2.410527 | -1.463611 |
| F | 3.268425  | -4.358342 | 0.326295  |
| F | 2.745086  | -2.027453 | -0.875652 |
| F | 1.875950  | -5.109939 | 2.551135  |
| F | -0.064960 | -3.458055 | 3.547445  |
| F | -0.584314 | -1.124240 | 2.393383  |
| H | -0.860321 | 0.932138  | 1.180625  |

(C<sub>6</sub>F<sub>5</sub>)<sub>3</sub>B---O(H)H---OH<sub>2</sub>

Sum of electronic and thermal Free Energies= -2361.661887 Hartree/Particle

|   |           |           |           |
|---|-----------|-----------|-----------|
| B | -0.014010 | -0.016617 | 0.546754  |
| C | -0.902893 | -1.354388 | 0.269552  |
| C | -0.561032 | -2.362326 | -0.632044 |
| C | -2.127621 | -1.535262 | 0.918321  |
| C | -1.356727 | -3.478661 | -0.864518 |
| C | -2.947482 | -2.637538 | 0.718266  |
| C | -2.556163 | -3.619827 | -0.181586 |
| C | 1.542398  | -0.110419 | 0.060358  |
| C | 2.423921  | -1.001303 | 0.670909  |
| C | 2.096653  | 0.633738  | -0.979306 |
| C | 3.752692  | -1.156322 | 0.312293  |
| C | 3.425125  | 0.513230  | -1.376877 |
| C | 4.259598  | -0.383493 | -0.725452 |
| C | -0.774756 | 1.365643  | 0.145813  |
| C | -1.725872 | 1.446165  | -0.871508 |
| C | -0.492707 | 2.577977  | 0.764119  |
| C | -2.365797 | 2.628750  | -1.226238 |
| C | -1.104989 | 3.781499  | 0.450775  |
| C | -2.058834 | 3.805244  | -0.557120 |
| F | 3.904303  | 1.255767  | -2.380337 |
| F | 5.536592  | -0.506032 | -1.092337 |
| F | 4.542121  | -2.031452 | 0.944125  |
| F | 1.973180  | -1.811248 | 1.672999  |

|   |           |           |           |
|---|-----------|-----------|-----------|
| F | 1.349486  | 1.509284  | -1.676620 |
| F | -4.107475 | -2.757601 | 1.374728  |
| F | -3.328679 | -4.687614 | -0.390108 |
| F | -2.579847 | -0.601138 | 1.779484  |
| F | 0.572620  | -2.289461 | -1.355098 |
| F | -0.976464 | -4.415605 | -1.740304 |
| F | 0.459686  | 2.631216  | 1.740051  |
| F | -0.782169 | 4.907164  | 1.100695  |
| F | -2.666190 | 4.947727  | -0.883610 |
| F | -3.271445 | 2.642885  | -2.209458 |
| F | -2.055133 | 0.359288  | -1.593213 |
| O | 0.071295  | -0.010594 | 2.197706  |
| H | 0.748564  | 0.589253  | 2.623372  |
| H | 0.317595  | -0.906732 | 2.471123  |
| O | 2.008138  | 1.238982  | 3.507846  |
| H | 2.214359  | 2.084818  | 3.093283  |
| H | 1.865715  | 1.433775  | 4.440537  |

(C<sub>6</sub>F<sub>5</sub>)<sub>3</sub>B---O(H)-H---N(SiH<sub>2</sub>Ph)Ph(CH<sub>2</sub>Ph)

Sum of electronic and thermal Free Energies= -3364.879404 Hartree/Particle

|   |           |           |           |
|---|-----------|-----------|-----------|
| C | -3.548369 | 2.044999  | 0.300425  |
| N | -3.252785 | 0.654322  | -0.072493 |
| C | -2.581240 | 0.423036  | -1.282818 |
| C | -2.353607 | -0.894085 | -1.736226 |
| C | -1.672556 | -1.143987 | -2.921727 |
| C | -1.193887 | -0.095141 | -3.708426 |
| C | -1.423996 | 1.211795  | -3.282720 |
| C | -2.100284 | 1.474789  | -2.092619 |
| H | -3.871361 | 2.038217  | 1.343829  |
| H | -2.739607 | -1.736444 | -1.176268 |
| H | -1.523524 | -2.171434 | -3.233035 |
| H | -0.680960 | -0.291865 | -4.642197 |
| H | -1.079504 | 2.046658  | -3.882977 |
| H | -2.280062 | 2.503398  | -1.816449 |
| H | -2.630433 | 2.644132  | 0.285386  |
| C | -4.624308 | 2.742364  | -0.521885 |
| C | -4.712735 | 4.137557  | -0.468577 |
| C | -5.553753 | 2.040164  | -1.290116 |
| C | -5.714885 | 4.815090  | -1.156916 |
| H | -3.991819 | 4.698276  | 0.119352  |
| C | -6.555500 | 2.717488  | -1.984585 |
| H | -5.484823 | 0.961310  | -1.357118 |
| C | -6.641973 | 4.105288  | -1.918584 |
| H | -5.769196 | 5.896741  | -1.102982 |

|    |           |           |           |
|----|-----------|-----------|-----------|
| H  | -7.266347 | 2.157163  | -2.581840 |
| H  | -7.420345 | 4.630990  | -2.459802 |
| O  | 1.131869  | 0.472832  | -1.301253 |
| B  | 2.125824  | 0.012220  | -0.049725 |
| C  | 3.523134  | -0.271719 | -0.822653 |
| C  | 4.069912  | 0.701417  | -1.663306 |
| C  | 4.278765  | -1.436605 | -0.697322 |
| C  | 5.262188  | 0.534350  | -2.353688 |
| C  | 5.479836  | -1.640129 | -1.367946 |
| C  | 5.972715  | -0.649724 | -2.205060 |
| C  | 1.392007  | -1.290736 | 0.601745  |
| C  | 1.219201  | -1.509553 | 1.967020  |
| C  | 0.861801  | -2.284775 | -0.216359 |
| C  | 0.542096  | -2.612129 | 2.480312  |
| C  | 0.167763  | -3.390080 | 0.243861  |
| C  | 0.004727  | -3.551812 | 1.613111  |
| C  | 2.146236  | 1.318909  | 0.922935  |
| C  | 1.006529  | 2.068292  | 1.188197  |
| C  | 3.288418  | 1.749964  | 1.596810  |
| C  | 0.965286  | 3.174005  | 2.022030  |
| C  | 3.299872  | 2.849284  | 2.448394  |
| C  | 2.132467  | 3.571105  | 2.659810  |
| H  | 0.925076  | -0.251655 | -1.916250 |
| F  | 5.735362  | 1.500325  | -3.149976 |
| F  | 7.122054  | -0.830564 | -2.858639 |
| F  | 6.162469  | -2.780321 | -1.212463 |
| F  | 3.444793  | 1.884711  | -1.822137 |
| F  | 3.879729  | -2.436465 | 0.112290  |
| F  | 1.020325  | -2.188301 | -1.568623 |
| F  | -0.362125 | -4.279464 | -0.605142 |
| F  | -0.688830 | -4.591724 | 2.085912  |
| F  | 0.390964  | -2.764021 | 3.799584  |
| F  | 1.717467  | -0.648332 | 2.872624  |
| F  | 4.425005  | 3.216228  | 3.068691  |
| F  | 4.449489  | 1.084545  | 1.469765  |
| F  | 2.130312  | 4.630419  | 3.470451  |
| F  | -0.175348 | 3.849159  | 2.214640  |
| F  | -0.182779 | 1.712320  | 0.608207  |
| H  | 0.288038  | 0.879546  | -1.031478 |
| H  | -3.853270 | 0.127602  | 2.367920  |
| H  | -2.137045 | -1.289431 | 1.372497  |
| Si | -3.441678 | -0.613966 | 1.153197  |
| C  | -4.690117 | -1.959029 | 0.752745  |
| C  | -4.308475 | -3.309588 | 0.793193  |

|   |           |           |           |
|---|-----------|-----------|-----------|
| C | -6.031343 | -1.659092 | 0.461649  |
| C | -5.231650 | -4.324809 | 0.548239  |
| H | -3.281117 | -3.578949 | 1.019301  |
| C | -6.954800 | -2.670696 | 0.214025  |
| H | -6.363465 | -0.626045 | 0.430354  |
| C | -6.555239 | -4.005911 | 0.256428  |
| H | -4.916426 | -5.361536 | 0.584750  |
| H | -7.985772 | -2.419294 | -0.009053 |
| H | -7.274506 | -4.794237 | 0.064383  |

(C<sub>6</sub>F<sub>5</sub>)<sub>3</sub>B---O(H)-H---HSiH<sub>2</sub>Ph

Sum of electronic and thermal Free Energies= -2808.146705 Hartree/Particle

|   |           |           |           |
|---|-----------|-----------|-----------|
| B | 0.766299  | -0.058462 | -0.105899 |
| C | 0.944869  | -1.646535 | 0.157083  |
| C | 0.802498  | -2.273320 | 1.394411  |
| C | 1.290757  | -2.492662 | -0.900451 |
| C | 0.974515  | -3.641188 | 1.577690  |
| C | 1.465987  | -3.861739 | -0.759203 |
| C | 1.304853  | -4.440859 | 0.493311  |
| C | 0.059231  | 0.787643  | 1.099104  |
| C | -1.300747 | 0.683845  | 1.374050  |
| C | 0.753941  | 1.638678  | 1.958124  |
| C | -1.957353 | 1.368588  | 2.382024  |
| C | 0.144055  | 2.342293  | 2.992229  |
| C | -1.221891 | 2.213154  | 3.203482  |
| C | 2.060787  | 0.682746  | -0.757895 |
| C | 3.371273  | 0.299168  | -0.474604 |
| C | 1.952042  | 1.778760  | -1.606047 |
| C | 4.483107  | 0.943417  | -1.004103 |
| C | 3.026526  | 2.452660  | -2.165514 |
| C | 4.311175  | 2.024863  | -1.858466 |
| F | 0.862546  | 3.143274  | 3.783098  |
| F | -1.821546 | 2.888982  | 4.183093  |
| F | -3.276803 | 1.231613  | 2.563135  |
| F | -2.081012 | -0.153782 | 0.615190  |
| F | 2.082848  | 1.800095  | 1.836350  |
| F | 1.792972  | -4.623891 | -1.808670 |
| F | 1.469446  | -5.755019 | 0.651657  |
| F | 1.487949  | -1.983885 | -2.132093 |
| F | 0.498987  | -1.565020 | 2.499313  |
| F | 0.823412  | -4.190243 | 2.788015  |
| F | 0.707242  | 2.256683  | -1.938454 |
| F | 2.838714  | 3.492923  | -2.983054 |
| F | 5.369064  | 2.649661  | -2.376401 |



|    |           |           |           |
|----|-----------|-----------|-----------|
| F  | 5.716556  | 0.534416  | -0.695327 |
| F  | 3.615427  | -0.717888 | 0.369152  |
| O  | -0.344981 | -0.044924 | -1.353872 |
| H  | -0.389394 | 0.827970  | -1.784304 |
| H  | -1.231721 | -0.272940 | -1.027466 |
| H  | -2.603844 | 1.735551  | -1.836745 |
| Si | -4.021377 | 2.142809  | -1.589033 |
| H  | -4.387208 | 3.102806  | -2.659657 |
| H  | -4.049286 | 2.810195  | -0.263851 |
| C  | -5.160701 | 0.651981  | -1.618299 |
| C  | -5.352879 | -0.134123 | -0.470076 |
| C  | -5.831374 | 0.283527  | -2.795316 |
| C  | -6.181586 | -1.253140 | -0.501205 |
| H  | -4.856411 | 0.127982  | 0.458322  |
| C  | -6.660121 | -0.835733 | -2.827699 |
| H  | -5.713737 | 0.877988  | -3.696036 |
| C  | -6.835310 | -1.605955 | -1.680195 |
| H  | -6.320414 | -1.846338 | 0.395754  |
| H  | -7.171860 | -1.103039 | -3.745521 |
| H  | -7.482610 | -2.475494 | -1.703171 |

(C<sub>6</sub>F<sub>5</sub>)<sub>3</sub>B---NPh=CHPh---H<sub>2</sub>O

Sum of electronic and thermal Free Energies= -2841.903712 Hartree/Particle

|   |           |           |           |
|---|-----------|-----------|-----------|
| C | 0.238806  | 2.779568  | 0.539551  |
| C | 0.060715  | 1.713770  | -0.337714 |
| C | -0.191199 | 2.100537  | -1.657735 |
| C | -0.252003 | 3.418195  | -2.084205 |
| C | -0.062214 | 4.441374  | -1.164073 |
| C | 0.185631  | 4.116939  | 0.159511  |
| B | -0.018737 | 0.100015  | 0.023617  |
| C | 1.220084  | -0.804555 | -0.614084 |
| C | 1.378847  | -2.143302 | -0.251201 |
| C | 2.353490  | -2.993708 | -0.746054 |
| C | 3.271467  | -2.507912 | -1.665984 |
| C | 3.184879  | -1.180927 | -2.051644 |
| C | 2.185520  | -0.367321 | -1.523722 |
| F | 0.518282  | -2.712316 | 0.633230  |
| F | 2.403122  | -4.274657 | -0.356066 |
| F | 4.224153  | -3.301432 | -2.159381 |
| F | 4.080660  | -0.677824 | -2.909430 |
| F | 2.253356  | 0.921038  | -1.917526 |
| F | -0.380880 | 1.158804  | -2.603671 |
| F | -0.487835 | 3.712929  | -3.367801 |
| F | -0.114044 | 5.718500  | -1.551403 |

|   |           |           |           |
|---|-----------|-----------|-----------|
| F | 0.370143  | 5.087713  | 1.064232  |
| F | 0.480217  | 2.568718  | 1.858911  |
| C | -1.525905 | -0.386562 | -0.486218 |
| C | -2.653660 | 0.383235  | -0.169705 |
| C | -3.949500 | 0.081266  | -0.563858 |
| C | -4.183275 | -1.058145 | -1.319757 |
| C | -3.104071 | -1.847984 | -1.673640 |
| C | -1.819398 | -1.497119 | -1.277024 |
| F | -2.529331 | 1.493820  | 0.586519  |
| F | -4.972277 | 0.867503  | -0.208528 |
| F | -5.421664 | -1.387239 | -1.691893 |
| F | -3.301395 | -2.980534 | -2.372651 |
| F | -0.857957 | -2.342168 | -1.710679 |
| N | 0.054303  | -0.152043 | 1.671901  |
| C | 1.109964  | -0.212799 | 2.427323  |
| C | -1.175083 | -0.399967 | 2.433750  |
| C | -1.873721 | -1.600016 | 2.307400  |
| C | -1.596443 | 0.578853  | 3.333822  |
| C | -3.001760 | -1.812029 | 3.096355  |
| H | -1.566001 | -2.364363 | 1.609356  |
| C | -2.729555 | 0.355728  | 4.112163  |
| H | -1.055812 | 1.513985  | 3.398443  |
| C | -3.433263 | -0.839829 | 3.996548  |
| H | -3.537629 | -2.748670 | 2.998286  |
| H | -3.060360 | 1.121765  | 4.803606  |
| H | -4.314853 | -1.012820 | 4.602795  |
| H | 0.909720  | -0.548670 | 3.442261  |
| C | 2.522330  | 0.065311  | 2.204037  |
| C | 3.396002  | -0.536373 | 3.132835  |
| C | 3.065143  | 0.910166  | 1.220746  |
| C | 4.767780  | -0.345410 | 3.051197  |
| H | 2.988084  | -1.167013 | 3.915316  |
| C | 4.436212  | 1.117304  | 1.157837  |
| H | 2.426049  | 1.422929  | 0.521037  |
| C | 5.290548  | 0.484555  | 2.061001  |
| H | 5.425109  | -0.829808 | 3.763023  |
| H | 4.839529  | 1.776088  | 0.398213  |
| H | 6.360238  | 0.648453  | 1.999729  |
| H | -2.310778 | -4.374719 | -0.663079 |
| O | -1.934115 | -4.421406 | 0.222191  |
| H | -0.995968 | -4.254445 | 0.082563  |

(C<sub>6</sub>F<sub>5</sub>)<sub>3</sub>B---H-Si(H<sub>2</sub>Ph)---OH<sub>2</sub>

Sum of electronic and thermal Free Energies= -2808.125493 Hartree/Particle

|    |           |           |           |
|----|-----------|-----------|-----------|
| H  | -0.233761 | -0.000361 | -1.022303 |
| Si | -0.856281 | -0.103677 | -2.489757 |
| H  | -0.223044 | 1.090350  | -3.071801 |
| O  | -1.474605 | -0.276796 | -4.977637 |
| H  | -2.369685 | -0.620957 | -5.076657 |
| C  | -2.700438 | -0.001375 | -2.213175 |
| C  | -3.358594 | 1.238332  | -2.151560 |
| C  | -3.467970 | -1.172611 | -2.093662 |
| C  | -4.739055 | 1.303556  | -1.982261 |
| H  | -2.790957 | 2.159021  | -2.220949 |
| C  | -4.848811 | -1.105843 | -1.922204 |
| H  | -2.986041 | -2.143562 | -2.116805 |
| C  | -5.485742 | 0.132247  | -1.867902 |
| H  | -5.230727 | 2.268526  | -1.932359 |
| H  | -5.423892 | -2.019245 | -1.821861 |
| H  | -6.559937 | 0.184388  | -1.730716 |
| H  | -0.346387 | -1.431835 | -2.856786 |
| H  | -1.473705 | 0.567687  | -5.441753 |
| B  | 0.502821  | -0.001487 | 0.212854  |
| C  | 1.086592  | 1.499774  | 0.222485  |
| C  | 0.315926  | 2.592581  | -0.165960 |
| C  | 2.378161  | 1.811549  | 0.646708  |
| C  | 0.775494  | 3.900219  | -0.174384 |
| C  | 2.876987  | 3.109404  | 0.667291  |
| C  | 2.072292  | 4.160509  | 0.249626  |
| C  | -0.714192 | -0.330026 | 1.210921  |
| C  | -1.025884 | 0.416815  | 2.346281  |
| C  | -1.544394 | -1.425611 | 0.978595  |
| C  | -2.093546 | 0.109637  | 3.183425  |
| C  | -2.627107 | -1.757947 | 1.775647  |
| C  | -2.902056 | -0.980630 | 2.893990  |
| C  | 1.578606  | -1.170313 | -0.048763 |
| C  | 2.332050  | -1.206315 | -1.220243 |
| C  | 1.868639  | -2.176858 | 0.871389  |
| C  | 3.288249  | -2.171804 | -1.495086 |
| C  | 2.825920  | -3.158675 | 0.642251  |
| C  | 3.537892  | -3.158375 | -0.549461 |
| F  | 2.538295  | 5.411147  | 0.258446  |
| F  | 4.122348  | 3.354203  | 1.088730  |
| F  | 3.205926  | 0.847302  | 1.088857  |
| F  | -0.961925 | 2.395824  | -0.570156 |
| F  | -0.013159 | 4.904291  | -0.578382 |
| F  | 1.236337  | -2.224700 | 2.058179  |
| F  | 3.069914  | -4.100373 | 1.560323  |

|   |           |           |           |
|---|-----------|-----------|-----------|
| F | 4.456716  | -4.097345 | -0.784977 |
| F | 3.968606  | -2.160266 | -2.647181 |
| F | 2.132664  | -0.258587 | -2.167349 |
| F | -0.279470 | 1.479076  | 2.699250  |
| F | -2.348041 | 0.855737  | 4.264268  |
| F | -3.935718 | -1.281105 | 3.683270  |
| F | -3.403098 | -2.808480 | 1.480633  |
| F | -1.307766 | -2.220076 | -0.091497 |

(C<sub>6</sub>F<sub>5</sub>)<sub>3</sub>B---H-Si(H<sub>2</sub>Ph)---NPh=CHPh

Sum of electronic and thermal Free Energies= -3288.398243 Hartree/Particle

|   |           |           |           |
|---|-----------|-----------|-----------|
| C | 1.681920  | -1.398555 | 2.132871  |
| C | 2.073900  | -0.143249 | 1.669038  |
| C | 2.714009  | 0.663392  | 2.610739  |
| C | 2.938606  | 0.262471  | 3.922813  |
| C | 2.510776  | -0.990833 | 4.338917  |
| C | 1.871507  | -1.831350 | 3.435589  |
| B | 1.834490  | 0.311757  | 0.152780  |
| C | 2.459185  | -0.580418 | -1.017597 |
| C | 3.561230  | -1.419961 | -0.851486 |
| C | 4.084342  | -2.191650 | -1.882848 |
| C | 3.496644  | -2.146421 | -3.139800 |
| C | 2.398904  | -1.321809 | -3.354288 |
| C | 1.920970  | -0.554882 | -2.304730 |
| F | 4.189755  | -1.502315 | 0.334438  |
| F | 5.147683  | -2.975199 | -1.675458 |
| F | 3.982446  | -2.888411 | -4.135728 |
| F | 1.819836  | -1.275828 | -4.559241 |
| F | 0.858467  | 0.239302  | -2.563954 |
| F | 3.174212  | 1.880945  | 2.270746  |
| F | 3.564489  | 1.070516  | 4.784479  |
| F | 2.713573  | -1.387472 | 5.595818  |
| F | 1.454198  | -3.040720 | 3.826246  |
| F | 1.066548  | -2.256781 | 1.289630  |
| C | 1.643391  | 1.879876  | -0.116988 |
| C | 0.643290  | 2.615694  | 0.517217  |
| C | 0.454280  | 3.975134  | 0.326947  |
| C | 1.305995  | 4.665204  | -0.526152 |
| C | 2.330327  | 3.981692  | -1.167058 |
| C | 2.479739  | 2.615589  | -0.956904 |
| F | -0.211944 | 1.993342  | 1.360046  |
| F | -0.539310 | 4.625739  | 0.949454  |
| F | 1.142530  | 5.974091  | -0.722834 |
| F | 3.162847  | 4.641770  | -1.978087 |

|    |           |           |           |
|----|-----------|-----------|-----------|
| F  | 3.505342  | 2.021465  | -1.591499 |
| H  | 0.374218  | -0.157130 | -0.024444 |
| Si | -1.143448 | -0.502947 | -0.114242 |
| N  | -4.581684 | -0.124308 | 0.652054  |
| C  | -1.337115 | -2.036229 | -1.151264 |
| C  | -1.358278 | -3.308319 | -0.555289 |
| C  | -1.514599 | -4.453500 | -1.330361 |
| C  | -1.649494 | -4.346963 | -2.713315 |
| C  | -1.632097 | -3.092935 | -3.321352 |
| C  | -1.479524 | -1.946559 | -2.546808 |
| H  | -1.252098 | -3.406375 | 0.518901  |
| H  | -1.532141 | -5.427741 | -0.855416 |
| H  | -1.768578 | -5.240004 | -3.316753 |
| H  | -1.734751 | -3.007586 | -4.397151 |
| H  | -1.464339 | -0.978044 | -3.033782 |
| C  | -5.437579 | 0.623971  | 0.069734  |
| C  | -4.901191 | -1.469502 | 0.925909  |
| C  | -5.525443 | -2.310674 | -0.006947 |
| C  | -5.790436 | -3.638914 | 0.314783  |
| C  | -5.443257 | -4.145103 | 1.565386  |
| C  | -4.810335 | -3.315707 | 2.491784  |
| C  | -4.525460 | -1.993561 | 2.170991  |
| H  | -5.767861 | -1.931159 | -0.992903 |
| H  | -6.262843 | -4.282297 | -0.419186 |
| H  | -5.652434 | -5.179447 | 1.812492  |
| H  | -4.531444 | -3.702975 | 3.465435  |
| H  | -4.028988 | -1.340959 | 2.879298  |
| H  | -1.704612 | 0.700015  | -0.755974 |
| H  | -1.514040 | -0.693285 | 1.298987  |
| H  | -6.435170 | 0.246730  | -0.194020 |
| C  | -5.187765 | 2.028767  | -0.271675 |
| C  | -4.023846 | 2.698574  | 0.137727  |
| C  | -6.147651 | 2.726491  | -1.017283 |
| C  | -3.825584 | 4.029721  | -0.202599 |
| H  | -3.292567 | 2.164870  | 0.730739  |
| C  | -5.945671 | 4.059558  | -1.361838 |
| H  | -7.054141 | 2.217625  | -1.329466 |
| C  | -4.784093 | 4.712307  | -0.955922 |
| H  | -2.925393 | 4.538144  | 0.121684  |
| H  | -6.693202 | 4.588197  | -1.942095 |
| H  | -4.625603 | 5.751962  | -1.219393 |

H<sub>2</sub>O---SiH<sub>3</sub>Ph

Sum of electronic and thermal Free Energies= -599.381769 Hartree/Particle

|    |           |           |           |
|----|-----------|-----------|-----------|
| H  | -1.145196 | 2.925497  | 0.002003  |
| Si | -1.456601 | 1.472183  | 0.000225  |
| H  | -2.291050 | 1.173180  | 1.197165  |
| O  | -3.152202 | -1.678089 | -0.000417 |
| H  | -3.466350 | -1.177875 | 0.759823  |
| C  | 0.150415  | 0.500548  | -0.000107 |
| C  | 1.381970  | 1.173535  | -0.000300 |
| C  | 0.158041  | -0.905074 | 0.000162  |
| C  | 2.584801  | 0.469093  | -0.000226 |
| H  | 1.406259  | 2.258693  | -0.000474 |
| C  | 1.360108  | -1.607845 | 0.000237  |
| H  | -0.781431 | -1.449018 | 0.000239  |
| C  | 2.574731  | -0.923188 | 0.000053  |
| H  | 3.526508  | 1.007073  | -0.000372 |
| H  | 1.348428  | -2.692364 | 0.000445  |
| H  | 3.509324  | -1.473464 | 0.000140  |
| H  | -2.290250 | 1.176441  | -1.198109 |
| H  | -3.466608 | -1.176425 | -0.759600 |

PhH<sub>3</sub>Si---NPh-CH<sub>2</sub>Ph

Sum of electronic and thermal Free Energies= -1080.850285 Hartree/Particle

|    |           |           |           |
|----|-----------|-----------|-----------|
| H  | 0.386583  | 3.398417  | 3.286112  |
| Si | 0.111244  | 2.244150  | 2.389612  |
| H  | 1.172296  | 1.227785  | 2.624263  |
| C  | 0.088509  | 2.821514  | 0.598631  |
| C  | 0.938909  | 3.849138  | 0.160181  |
| C  | -0.768243 | 2.226400  | -0.341265 |
| C  | 0.940649  | 4.263486  | -1.169884 |
| H  | 1.604444  | 4.339696  | 0.864269  |
| C  | -0.770527 | 2.641414  | -1.671958 |
| H  | -1.443002 | 1.433658  | -0.036586 |
| C  | 0.084893  | 3.659072  | -2.088783 |
| H  | 1.603989  | 5.060682  | -1.487350 |
| H  | -1.445431 | 2.172629  | -2.379678 |
| H  | 0.081300  | 3.983834  | -3.123499 |
| H  | -1.198008 | 1.641278  | 2.746773  |
| N  | -0.480426 | -1.577190 | 0.201392  |
| C  | -1.868225 | -1.597247 | 0.102410  |
| C  | -2.534710 | -1.587327 | -1.134793 |
| C  | -3.927683 | -1.553284 | -1.184422 |
| C  | -4.688289 | -1.536740 | -0.020229 |
| C  | -4.031115 | -1.554599 | 1.211898  |
| C  | -2.646022 | -1.582907 | 1.276919  |
| C  | 0.375371  | -1.897387 | -0.938500 |

|   |           |           |           |
|---|-----------|-----------|-----------|
| C | 1.829442  | -1.911579 | -0.524906 |
| C | 2.517724  | -3.118051 | -0.378145 |
| C | 3.853932  | -3.131784 | 0.020496  |
| C | 4.514994  | -1.934424 | 0.279617  |
| C | 3.835443  | -0.724539 | 0.138838  |
| C | 2.502023  | -0.713220 | -0.259568 |
| H | 0.108422  | -2.867020 | -1.384893 |
| H | -1.971385 | -1.608009 | -2.058737 |
| H | -4.418336 | -1.546030 | -2.151929 |
| H | -5.770313 | -1.513662 | -0.067424 |
| H | -4.604178 | -1.545296 | 2.132778  |
| H | -2.147887 | -1.588367 | 2.241519  |
| H | 2.005984  | -4.053320 | -0.582049 |
| H | 4.376169  | -4.076158 | 0.126062  |
| H | 5.554545  | -1.942036 | 0.587607  |
| H | 4.346024  | 0.211346  | 0.336356  |
| H | 1.975950  | 0.228928  | -0.369536 |
| H | -0.118755 | -1.906624 | 1.084790  |
| H | 0.224709  | -1.137115 | -1.712367 |

PhHC=NPh

Sum of electronic and thermal Free Energies= -556.723247 Hartree/Particle

|   |           |           |           |
|---|-----------|-----------|-----------|
| N | -0.455238 | -0.496787 | 0.118002  |
| C | 0.400451  | 0.403061  | -0.174834 |
| C | 1.848931  | 0.181352  | -0.084510 |
| C | 2.376248  | -1.040286 | 0.361999  |
| C | 2.726625  | 1.209469  | -0.451410 |
| C | 3.749787  | -1.222272 | 0.436174  |
| H | 1.687791  | -1.827704 | 0.642692  |
| C | 4.104279  | 1.025348  | -0.375269 |
| H | 2.324422  | 2.156330  | -0.797818 |
| C | 4.617965  | -0.190782 | 0.068495  |
| H | 4.150835  | -2.168544 | 0.781630  |
| H | 4.774822  | 1.827554  | -0.661608 |
| H | 5.690591  | -0.337174 | 0.128854  |
| H | 0.094229  | 1.397907  | -0.527822 |
| C | -1.830850 | -0.213500 | 0.068494  |
| C | -2.383513 | 0.995186  | 0.520197  |
| C | -2.688686 | -1.216060 | -0.406539 |
| C | -3.759106 | 1.201006  | 0.466661  |
| H | -1.737016 | 1.754368  | 0.945426  |
| C | -4.058953 | -0.996422 | -0.474684 |
| H | -2.254144 | -2.155547 | -0.726538 |
| C | -4.601424 | 0.212972  | -0.038865 |

|   |           |           |           |
|---|-----------|-----------|-----------|
| H | -4.174707 | 2.134567  | 0.829912  |
| H | -4.708495 | -1.775297 | -0.858473 |
| H | -5.672194 | 0.376614  | -0.077719 |

PhSiH<sub>3</sub>

Sum of electronic and thermal Free Energies= -522.944530 Hartree/Particle

|    |           |           |           |
|----|-----------|-----------|-----------|
| Si | -2.347260 | 0.000003  | 0.006600  |
| H  | -2.859532 | 1.213998  | -0.681026 |
| C  | -0.465832 | 0.000019  | -0.014367 |
| C  | 0.257206  | 1.203115  | -0.010885 |
| C  | 0.257177  | -1.203097 | -0.010886 |
| C  | 1.650177  | 1.205192  | 0.003423  |
| H  | -0.269994 | 2.152130  | -0.024851 |
| C  | 1.650149  | -1.205209 | 0.003422  |
| H  | -0.270043 | -2.152100 | -0.024857 |
| C  | 2.349051  | -0.000017 | 0.011668  |
| H  | 2.189396  | 2.146141  | 0.004296  |
| H  | 2.189342  | -2.146173 | 0.004294  |
| H  | 3.433390  | -0.000027 | 0.020457  |
| H  | -2.859512 | -1.213873 | -0.681253 |
| H  | -2.878972 | -0.000155 | 1.396274  |

B(C<sub>6</sub>F<sub>5</sub>)<sub>3</sub>

Sum of electronic and thermal Free Energies= -2208.767110 Hartree/Particle

|   |           |           |           |
|---|-----------|-----------|-----------|
| C | -0.303654 | 2.467667  | 0.753208  |
| C | -0.750395 | 1.375996  | -0.000198 |
| C | -1.910227 | 1.590392  | -0.753581 |
| C | -2.581043 | 2.803783  | -0.774231 |
| C | -2.104649 | 3.856215  | -0.000225 |
| C | -0.961766 | 3.687996  | 0.773847  |
| B | 0.000472  | 0.000152  | 0.000228  |
| C | 1.567227  | -0.037866 | 0.000085  |
| C | 2.288771  | -0.969686 | 0.755148  |
| C | 3.674618  | -1.010517 | 0.776039  |
| C | 4.392298  | -0.106786 | 0.000246  |
| C | 3.719620  | 0.830966  | -0.775518 |
| C | 2.333429  | 0.857725  | -0.754854 |
| F | 1.642279  | -1.856133 | 1.528789  |
| F | 4.323638  | -1.903091 | 1.527174  |
| F | 5.721671  | -0.139218 | 0.000317  |
| F | 4.411505  | 1.690824  | -1.526550 |
| F | 1.731038  | 1.774732  | -1.528479 |
| F | -2.403588 | 0.609071  | -1.525610 |
| F | -3.673005 | 2.971646  | -1.523596 |



|   |           |           |           |
|---|-----------|-----------|-----------|
| F | -2.741981 | 5.023358  | -0.000210 |
| F | -0.512652 | 4.697359  | 1.523242  |
| F | 0.788576  | 2.352289  | 1.525320  |
| C | -0.816081 | -1.337660 | 0.000399  |
| C | -1.983981 | -1.496705 | 0.755114  |
| C | -2.712283 | -2.676495 | 0.775527  |
| C | -2.288162 | -3.749783 | -0.000237 |
| C | -1.139644 | -3.635895 | -0.775867 |
| C | -0.423445 | -2.448784 | -0.754769 |
| F | -2.428504 | -0.493802 | 1.528999  |
| F | -3.809949 | -2.792502 | 1.526389  |
| F | -2.980841 | -4.884924 | -0.000510 |
| F | -0.740746 | -4.664853 | -1.527022 |
| F | 0.671876  | -2.385215 | -1.528467 |

#### H<sub>2</sub>O

Sum of electronic and thermal Free Energies= -76.444443 Hartree/Particle

|   |           |           |          |
|---|-----------|-----------|----------|
| O | 0.000000  | 0.118797  | 0.000000 |
| H | 0.756848  | -0.475134 | 0.000000 |
| H | -0.756848 | -0.475245 | 0.000000 |

#### PhSiH<sub>2</sub>OH

Sum of electronic and thermal Free Energies= -598.232857 Hartree/Particle

|    |           |           |           |
|----|-----------|-----------|-----------|
| Si | -1.927295 | 0.000047  | -0.476630 |
| H  | -2.313047 | 1.211695  | -1.252616 |
| C  | -0.079664 | 0.000178  | -0.212972 |
| C  | 0.634806  | 1.204251  | -0.111947 |
| C  | 0.634554  | -1.204085 | -0.112024 |
| C  | 2.012133  | 1.206438  | 0.093553  |
| H  | 0.110482  | 2.151007  | -0.196985 |
| C  | 2.011871  | -1.206594 | 0.093481  |
| H  | 0.110023  | -2.150719 | -0.197149 |
| C  | 2.701576  | -0.000151 | 0.197612  |
| H  | 2.547521  | 2.146407  | 0.170088  |
| H  | 2.547060  | -2.146682 | 0.169962  |
| H  | 3.774474  | -0.000269 | 0.355760  |
| H  | -2.312680 | -1.211704 | -1.252626 |
| O  | -2.668244 | -0.000096 | 1.017319  |
| H  | -3.627403 | 0.000160  | 1.051610  |

#### PhH<sub>2</sub>C-NHPh

Sum of electronic and thermal Free Energies= -557.914955 Hartree/Particle

|   |          |           |          |
|---|----------|-----------|----------|
| N | 0.643036 | -1.529739 | 0.021765 |
| C | 1.663634 | -0.579607 | 0.030017 |

|   |           |           |           |
|---|-----------|-----------|-----------|
| C | 1.472667  | 0.719231  | 0.527853  |
| C | 2.514171  | 1.643776  | 0.492441  |
| C | 3.757602  | 1.307665  | -0.034319 |
| C | 3.949916  | 0.018971  | -0.534012 |
| C | 2.921561  | -0.912448 | -0.504720 |
| C | -0.524546 | -1.422609 | 0.881124  |
| C | -1.658116 | -0.571857 | 0.322180  |
| C | -1.818641 | -0.384687 | -1.051364 |
| C | -2.892083 | 0.354769  | -1.543543 |
| C | -3.820541 | 0.914468  | -0.668623 |
| C | -3.665557 | 0.734808  | 0.704642  |
| C | -2.589179 | -0.000720 | 1.194417  |
| H | -0.901476 | -2.439188 | 1.034350  |
| H | 0.509320  | 1.014789  | 0.922468  |
| H | 2.342590  | 2.642005  | 0.880721  |
| H | 4.561636  | 2.033399  | -0.058159 |
| H | 4.911055  | -0.265264 | -0.948775 |
| H | 3.084257  | -1.911991 | -0.897420 |
| H | -1.087706 | -0.812540 | -1.727179 |
| H | -3.001149 | 0.496412  | -2.613255 |
| H | -4.654239 | 1.491646  | -1.052460 |
| H | -4.378376 | 1.173003  | 1.394559  |
| H | -2.469515 | -0.129772 | 2.266331  |
| H | 0.967142  | -2.472047 | -0.125761 |
| H | -0.250117 | -1.042844 | 1.875663  |

#### A-TS1

Sum of electronic and thermal Free Energies= -2808.091940 Hartree/Particle

|   |           |           |           |
|---|-----------|-----------|-----------|
| C | -0.983526 | 2.447510  | 0.974441  |
| C | -1.271281 | 1.449796  | 0.050079  |
| C | -2.342413 | 1.735275  | -0.795490 |
| C | -3.068191 | 2.918333  | -0.746379 |
| C | -2.732313 | 3.884900  | 0.193314  |
| C | -1.678891 | 3.647874  | 1.063232  |
| B | -0.467357 | 0.026644  | 0.022907  |
| C | -1.510695 | -1.234723 | 0.147280  |
| C | -1.915898 | -2.054510 | -0.903874 |
| C | -2.803339 | -3.115212 | -0.750107 |
| C | -3.330916 | -3.391738 | 0.503328  |
| C | -2.962659 | -2.600854 | 1.582958  |
| C | -2.076140 | -1.551718 | 1.379952  |
| F | -1.451426 | -1.847074 | -2.151531 |
| F | -3.155192 | -3.874073 | -1.798286 |
| F | -4.183772 | -4.411088 | 0.671318  |

|    |           |           |           |
|----|-----------|-----------|-----------|
| F  | -3.460367 | -2.860252 | 2.804463  |
| F  | -1.760107 | -0.817869 | 2.481425  |
| F  | -2.714690 | 0.838280  | -1.727918 |
| F  | -4.085869 | 3.140721  | -1.590445 |
| F  | -3.418361 | 5.033478  | 0.258736  |
| F  | -1.345922 | 4.572282  | 1.981084  |
| F  | 0.025539  | 2.290968  | 1.878002  |
| C  | 0.637252  | -0.162280 | -1.171116 |
| C  | 0.775029  | 0.570076  | -2.348449 |
| C  | 1.808211  | 0.364136  | -3.259222 |
| C  | 2.769788  | -0.606714 | -3.012285 |
| C  | 2.679895  | -1.362409 | -1.852203 |
| C  | 1.624491  | -1.120830 | -0.988928 |
| F  | 3.612191  | -2.290264 | -1.570823 |
| F  | 3.773986  | -0.806737 | -3.875734 |
| F  | 1.890227  | 1.099758  | -4.375996 |
| F  | -0.103299 | 1.538088  | -2.665768 |
| F  | 1.601029  | -1.902049 | 0.150210  |
| C  | 4.428359  | -0.627940 | 1.410727  |
| C  | 3.245285  | -0.045684 | 1.902483  |
| C  | 3.112444  | 1.354665  | 1.889403  |
| C  | 4.152128  | 2.149438  | 1.416020  |
| C  | 5.324518  | 1.561130  | 0.943785  |
| C  | 5.461877  | 0.173875  | 0.937345  |
| Si | 1.924158  | -1.139072 | 2.575714  |
| O  | 2.603120  | -1.046194 | 4.474574  |
| H  | 0.204931  | 0.002749  | 1.032955  |
| H  | 4.535537  | -1.706715 | 1.375346  |
| H  | 6.364488  | -0.283139 | 0.549523  |
| H  | 6.126835  | 2.184210  | 0.565463  |
| H  | 4.037991  | 3.226837  | 1.397440  |
| H  | 2.188647  | 1.820497  | 2.209579  |
| H  | 3.329009  | -0.424775 | 4.628543  |
| H  | 1.980235  | -1.006036 | 5.213636  |
| H  | 2.134425  | -2.586044 | 2.467040  |
| H  | 0.597715  | -0.676129 | 2.972959  |

#### A-IM1

Sum of electronic and thermal Free Energies= -2808.095110 Hartree/Particle

|   |           |           |           |
|---|-----------|-----------|-----------|
| C | -1.219509 | -2.317782 | -1.280766 |
| C | -1.483107 | -1.350114 | -0.316477 |
| C | -2.667597 | -1.547194 | 0.391494  |
| C | -3.534629 | -2.608071 | 0.164385  |
| C | -3.225589 | -3.542086 | -0.815922 |

|    |           |           |           |
|----|-----------|-----------|-----------|
| C  | -2.054860 | -3.397250 | -1.544764 |
| B  | -0.497490 | -0.063831 | -0.095730 |
| C  | -1.341034 | 1.343308  | -0.039641 |
| C  | -1.717161 | 2.010723  | 1.124562  |
| C  | -2.428179 | 3.206081  | 1.129409  |
| C  | -2.795547 | 3.788969  | -0.075699 |
| C  | -2.443382 | 3.165577  | -1.264362 |
| C  | -1.737539 | 1.969879  | -1.218767 |
| F  | -1.394453 | 1.507454  | 2.332587  |
| F  | -2.761937 | 3.803590  | 2.282558  |
| F  | -3.476404 | 4.942460  | -0.092194 |
| F  | -2.779433 | 3.725417  | -2.439855 |
| F  | -1.416847 | 1.425265  | -2.422707 |
| F  | -3.013960 | -0.689842 | 1.371939  |
| F  | -4.660320 | -2.745768 | 0.880241  |
| F  | -4.046374 | -4.573986 | -1.051553 |
| F  | -1.741325 | -4.296232 | -2.493378 |
| F  | -0.091235 | -2.256124 | -2.038733 |
| C  | 0.575620  | -0.199630 | 1.146520  |
| C  | 0.587021  | -1.159456 | 2.159763  |
| C  | 1.588054  | -1.244307 | 3.124714  |
| C  | 2.647959  | -0.346157 | 3.115346  |
| C  | 2.684666  | 0.634387  | 2.134889  |
| C  | 1.653728  | 0.663423  | 1.213027  |
| F  | 3.699653  | 1.511527  | 2.077501  |
| F  | 3.619458  | -0.426482 | 4.031485  |
| F  | 1.543951  | -2.192080 | 4.067867  |
| F  | -0.394059 | -2.072349 | 2.253815  |
| F  | 1.755086  | 1.708767  | 0.271443  |
| C  | 4.759820  | 0.352868  | -1.300862 |
| C  | 3.415479  | 0.254019  | -1.704941 |
| C  | 2.888119  | -1.009118 | -2.027761 |
| C  | 3.693952  | -2.141834 | -1.956838 |
| C  | 5.026227  | -2.029692 | -1.562406 |
| C  | 5.559070  | -0.784286 | -1.232349 |
| Si | 2.395419  | 1.788004  | -1.819169 |
| O  | 2.818825  | 2.082829  | -3.794789 |
| H  | 0.197039  | 0.000877  | -1.080777 |
| H  | 5.180251  | 1.313891  | -1.022758 |
| H  | 6.590996  | -0.700469 | -0.912237 |
| H  | 5.647878  | -2.915647 | -1.500420 |
| H  | 3.272375  | -3.111607 | -2.193092 |
| H  | 1.844612  | -1.117198 | -2.296953 |
| H  | 3.382694  | 1.408976  | -4.200164 |

|   |          |          |           |
|---|----------|----------|-----------|
| H | 2.087274 | 2.283114 | -4.395179 |
| H | 3.059768 | 3.030669 | -1.409426 |
| H | 0.972403 | 1.813771 | -2.138125 |

A-IM2

Sum of electronic and thermal Free Energies= -3364.862984 Hartree/Particle

|   |           |           |           |
|---|-----------|-----------|-----------|
| C | -1.905879 | -1.512331 | 1.995286  |
| C | -2.095594 | -1.425896 | 0.618017  |
| C | -2.635472 | -2.572682 | 0.037223  |
| C | -2.952291 | -3.725395 | 0.747780  |
| C | -2.727945 | -3.763960 | 2.116730  |
| C | -2.205534 | -2.644103 | 2.744020  |
| B | -1.615808 | -0.088148 | -0.207491 |
| C | -0.818689 | -0.499646 | -1.588358 |
| C | -1.363998 | -0.544106 | -2.870818 |
| C | -0.636998 | -0.890428 | -4.006592 |
| C | 0.706006  | -1.221949 | -3.889182 |
| C | 1.292358  | -1.197236 | -2.633319 |
| C | 0.529320  | -0.836308 | -1.532564 |
| F | -2.661665 | -0.254173 | -3.069000 |
| F | -1.217519 | -0.915087 | -5.215555 |
| F | 1.424999  | -1.563153 | -4.969148 |
| F | 2.602719  | -1.516555 | -2.492888 |
| F | 1.197474  | -0.827287 | -0.340157 |
| F | -2.876563 | -2.611704 | -1.287215 |
| F | -3.461073 | -4.803210 | 0.128956  |
| F | -2.998820 | -4.872801 | 2.824328  |
| F | -1.949498 | -2.683275 | 4.071765  |
| F | -1.375003 | -0.477980 | 2.691866  |
| C | -2.785231 | 1.039214  | -0.431849 |
| C | -4.156055 | 0.803816  | -0.513483 |
| C | -5.104699 | 1.812990  | -0.645265 |
| C | -4.694578 | 3.137134  | -0.708907 |
| C | -3.339644 | 3.426297  | -0.639443 |
| C | -2.432173 | 2.384463  | -0.506560 |
| F | -2.921101 | 4.704938  | -0.697822 |
| F | -5.594073 | 4.123347  | -0.837597 |
| F | -6.413423 | 1.521862  | -0.716229 |
| F | -4.638355 | -0.454619 | -0.473169 |
| F | -1.122181 | 2.752639  | -0.446377 |
| C | 0.988655  | 5.009702  | 1.153587  |
| C | 1.760313  | 4.015649  | 1.778651  |
| C | 2.564261  | 4.385306  | 2.869747  |
| C | 2.608441  | 5.704419  | 3.314288  |

|    |           |           |           |
|----|-----------|-----------|-----------|
| C  | 1.838448  | 6.677126  | 2.679586  |
| C  | 1.025681  | 6.327536  | 1.603043  |
| Si | 1.662077  | 2.245712  | 1.177804  |
| O  | 3.201958  | 1.513691  | 1.431540  |
| H  | -0.793814 | 0.438970  | 0.486754  |
| H  | 0.342145  | 4.751261  | 0.321345  |
| H  | 0.418445  | 7.080097  | 1.112974  |
| H  | 1.867673  | 7.703865  | 3.026970  |
| H  | 3.235514  | 5.971826  | 4.157637  |
| H  | 3.156947  | 3.637699  | 3.390152  |
| H  | 3.935041  | 2.134068  | 1.496543  |
| H  | 3.706135  | -0.072346 | 0.806122  |
| H  | 1.393041  | 2.219278  | -0.272302 |
| H  | 0.746635  | 1.396821  | 1.957038  |
| N  | 4.192053  | -0.866734 | 0.342670  |
| C  | 3.882940  | -2.098675 | 0.626665  |
| C  | 2.959806  | -2.550856 | 1.625078  |
| C  | 2.272105  | -1.686916 | 2.503439  |
| C  | 2.710252  | -3.938063 | 1.679031  |
| C  | 1.341638  | -2.203832 | 3.386534  |
| H  | 2.452766  | -0.619914 | 2.482358  |
| C  | 1.782334  | -4.447678 | 2.573428  |
| H  | 3.235115  | -4.603409 | 1.002173  |
| C  | 1.091283  | -3.580028 | 3.419093  |
| H  | 0.780136  | -1.539961 | 4.030287  |
| H  | 1.581525  | -5.511386 | 2.601866  |
| H  | 0.337077  | -3.965452 | 4.094358  |
| H  | 4.372749  | -2.855453 | 0.021630  |
| C  | 5.151865  | -0.480293 | -0.641754 |
| C  | 6.334777  | -1.200761 | -0.812949 |
| C  | 4.879416  | 0.646223  | -1.419889 |
| C  | 7.238100  | -0.801930 | -1.792854 |
| H  | 6.564648  | -2.042313 | -0.170127 |
| C  | 5.792707  | 1.036338  | -2.392471 |
| H  | 3.949248  | 1.182111  | -1.283064 |
| C  | 6.969315  | 0.313539  | -2.583559 |
| H  | 8.159420  | -1.355752 | -1.926872 |
| H  | 5.577597  | 1.900256  | -3.009422 |
| H  | 7.677185  | 0.621564  | -3.343532 |

### A-IM3

Sum of electronic and thermal Free Energies= -2766.645687 Hartree/Particle

|   |          |           |          |
|---|----------|-----------|----------|
| C | 1.909049 | -3.415227 | 0.872280 |
| N | 2.039100 | -2.123540 | 0.928158 |

|   |           |           |           |
|---|-----------|-----------|-----------|
| C | 3.294651  | -1.440263 | 0.816481  |
| C | 3.546707  | -0.359075 | 1.661551  |
| C | 4.766940  | 0.300062  | 1.561412  |
| C | 5.714713  | -0.107782 | 0.623635  |
| C | 5.440903  | -1.176088 | -0.227991 |
| C | 4.225734  | -1.846557 | -0.139818 |
| F | 0.522621  | -0.161858 | 2.606095  |
| C | -0.342998 | 0.899790  | 2.504851  |
| C | -0.860644 | 1.265671  | 1.269916  |
| C | -1.736022 | 2.350259  | 1.314678  |
| C | -2.066850 | 3.021515  | 2.485700  |
| C | -1.511239 | 2.612377  | 3.691663  |
| C | -0.635223 | 1.537297  | 3.703073  |
| B | -0.498874 | 0.434579  | -0.095371 |
| C | 0.764160  | 1.040263  | -0.949140 |
| C | 1.565257  | 0.182633  | -1.699157 |
| C | 2.683148  | 0.583980  | -2.416719 |
| C | 3.041899  | 1.923484  | -2.417145 |
| C | 2.270281  | 2.826853  | -1.700134 |
| C | 1.161935  | 2.375542  | -0.990348 |
| F | -2.302728 | 2.805492  | 0.182953  |
| F | -2.911692 | 4.061272  | 2.467752  |
| F | -1.814914 | 3.249677  | 4.829131  |
| F | -0.084710 | 1.126709  | 4.857981  |
| F | 1.286935  | -1.149726 | -1.739929 |
| F | 3.432684  | -0.313148 | -3.084397 |
| F | 4.121116  | 2.336812  | -3.095101 |
| F | 2.604960  | 4.125425  | -1.696346 |
| F | 0.464982  | 3.319964  | -0.329864 |
| C | -1.839658 | 0.138606  | -0.992845 |
| C | -2.807501 | -0.735554 | -0.506846 |
| C | -3.953366 | -1.099864 | -1.197954 |
| C | -4.185248 | -0.554105 | -2.452728 |
| C | -3.263186 | 0.339245  | -2.979483 |
| C | -2.123920 | 0.667276  | -2.249858 |
| F | -2.649246 | -1.303258 | 0.721868  |
| F | -1.286316 | 1.548852  | -2.831049 |
| F | -3.480719 | 0.877649  | -4.188024 |
| F | -5.283084 | -0.886091 | -3.144255 |
| F | -4.827567 | -1.976321 | -0.670628 |
| H | -0.131349 | -0.666333 | 0.278338  |
| H | 2.801351  | -0.052204 | 2.383000  |
| H | 4.973201  | 1.138544  | 2.215276  |
| H | 6.657722  | 0.419365  | 0.543050  |

|   |           |           |           |
|---|-----------|-----------|-----------|
| H | 6.158238  | -1.469951 | -0.984149 |
| H | 3.979592  | -2.630422 | -0.845264 |
| H | 1.202521  | -1.522490 | 0.990056  |
| H | 2.839889  | -3.971273 | 0.808788  |
| C | 0.688752  | -4.172386 | 0.896798  |
| C | 0.805543  | -5.577865 | 0.863855  |
| C | -0.589740 | -3.581818 | 0.940939  |
| C | -0.329893 | -6.372530 | 0.874938  |
| H | 1.788452  | -6.035002 | 0.826709  |
| C | -1.719118 | -4.383907 | 0.943933  |
| H | -0.709681 | -2.506567 | 0.957103  |
| C | -1.591120 | -5.775145 | 0.912547  |
| H | -0.237762 | -7.451322 | 0.849434  |
| H | -2.696221 | -3.917956 | 0.959232  |
| H | -2.479845 | -6.395670 | 0.914009  |

#### A-TS2

Sum of electronic and thermal Free Energies= -2766.635646 Hartree/Particle

|   |           |           |           |
|---|-----------|-----------|-----------|
| C | 0.286318  | -0.862042 | 2.339817  |
| N | 1.232689  | -0.094406 | 2.898237  |
| C | 2.610476  | -0.084189 | 2.554632  |
| C | 3.284106  | 1.139589  | 2.540021  |
| C | 4.640772  | 1.176703  | 2.235377  |
| C | 5.327212  | 0.001481  | 1.939200  |
| C | 4.650730  | -1.217432 | 1.961283  |
| C | 3.297371  | -1.268674 | 2.277167  |
| F | 0.135196  | 2.186555  | 1.812237  |
| C | -0.080399 | 2.600996  | 0.530365  |
| C | -0.203880 | 1.679827  | -0.497986 |
| C | -0.435149 | 2.241212  | -1.754468 |
| C | -0.524399 | 3.606591  | -1.983442 |
| C | -0.386749 | 4.485345  | -0.915245 |
| C | -0.159905 | 3.977178  | 0.354436  |
| B | -0.172366 | 0.056325  | -0.353195 |
| C | 1.149151  | -0.704399 | -0.917485 |
| C | 1.285118  | -2.085168 | -0.765157 |
| C | 2.388255  | -2.817217 | -1.169910 |
| C | 3.448814  | -2.154825 | -1.774771 |
| C | 3.375962  | -0.781747 | -1.948129 |
| C | 2.248275  | -0.087610 | -1.517603 |
| F | -0.555824 | 1.433025  | -2.825779 |
| F | -0.736040 | 4.086429  | -3.214850 |
| F | -0.467915 | 5.805381  | -1.110791 |
| F | -0.022110 | 4.809327  | 1.398386  |



|   |           |           |           |
|---|-----------|-----------|-----------|
| F | 0.296325  | -2.791449 | -0.150463 |
| F | 2.450337  | -4.141564 | -0.970939 |
| F | 4.531713  | -2.832507 | -2.168176 |
| F | 4.397360  | -0.131088 | -2.518918 |
| F | 2.282369  | 1.243923  | -1.710004 |
| C | -1.618759 | -0.555021 | -0.777702 |
| C | -2.760438 | -0.169798 | -0.072899 |
| C | -4.042180 | -0.608398 | -0.373680 |
| C | -4.227475 | -1.466530 | -1.448753 |
| C | -3.128745 | -1.863294 | -2.198468 |
| C | -1.860877 | -1.404824 | -1.858031 |
| F | -2.647070 | 0.680271  | 0.971421  |
| F | -0.854674 | -1.815977 | -2.651494 |
| F | -3.301677 | -2.679765 | -3.246092 |
| F | -5.451805 | -1.904693 | -1.759528 |
| F | -5.093985 | -0.217468 | 0.360580  |
| H | -0.098982 | -0.196228 | 0.947422  |
| H | 2.739525  | 2.055704  | 2.738620  |
| H | 5.156928  | 2.129105  | 2.217585  |
| H | 6.382071  | 0.033243  | 1.695201  |
| H | 5.180511  | -2.137149 | 1.743362  |
| H | 2.789870  | -2.224297 | 2.326426  |
| H | 0.915399  | 0.728991  | 3.390060  |
| H | 0.652701  | -1.734420 | 1.817159  |
| C | -1.048027 | -0.990515 | 2.942436  |
| C | -1.803561 | -2.124677 | 2.613051  |
| C | -1.584001 | -0.039616 | 3.822282  |
| C | -3.065943 | -2.311257 | 3.165296  |
| H | -1.398997 | -2.852598 | 1.919562  |
| C | -2.845238 | -0.228260 | 4.367617  |
| H | -1.040220 | 0.865609  | 4.065462  |
| C | -3.588619 | -1.363768 | 4.041514  |
| H | -3.642181 | -3.191455 | 2.906800  |
| H | -3.256535 | 0.514485  | 5.040509  |
| H | -4.576140 | -1.503360 | 4.465240  |

#### B-TS1

Sum of electronic and thermal Free Energies= -3288.388570 Hartree/Particle

|   |          |           |          |
|---|----------|-----------|----------|
| C | 1.515469 | -1.684085 | 2.020147 |
| C | 2.052665 | -0.514447 | 1.489326 |
| C | 3.028528 | 0.091883  | 2.279386 |
| C | 3.427823 | -0.409542 | 3.513590 |
| C | 2.843736 | -1.568594 | 4.004858 |
| C | 1.874162 | -2.215022 | 3.249603 |

|    |           |           |           |
|----|-----------|-----------|-----------|
| B  | 1.584869  | 0.058693  | 0.051142  |
| C  | 1.966743  | -0.821516 | -1.247226 |
| C  | 2.936401  | -1.821976 | -1.276269 |
| C  | 3.214758  | -2.574084 | -2.413282 |
| C  | 2.507700  | -2.338138 | -3.583527 |
| C  | 1.536329  | -1.345306 | -3.605543 |
| C  | 1.301621  | -0.611925 | -2.454155 |
| F  | 3.674928  | -2.100871 | -0.185468 |
| F  | 4.158743  | -3.523127 | -2.388426 |
| F  | 2.758943  | -3.058146 | -4.680583 |
| F  | 0.843982  | -1.108397 | -4.727745 |
| F  | 0.359033  | 0.356772  | -2.530449 |
| F  | 3.659308  | 1.205179  | 1.858772  |
| F  | 4.371948  | 0.212739  | 4.229524  |
| F  | 3.212787  | -2.060569 | 5.190622  |
| F  | 1.304254  | -3.337541 | 3.708083  |
| F  | 0.583621  | -2.368461 | 1.314425  |
| C  | 1.701681  | 1.666311  | -0.108295 |
| C  | 0.960653  | 2.526760  | 0.696979  |
| C  | 1.029044  | 3.908955  | 0.621141  |
| C  | 1.888442  | 4.495293  | -0.297287 |
| C  | 2.665948  | 3.683118  | -1.110833 |
| C  | 2.561941  | 2.300207  | -1.003924 |
| F  | 0.107833  | 2.014092  | 1.620573  |
| F  | 0.266478  | 4.681278  | 1.414316  |
| F  | 1.967154  | 5.825457  | -0.392898 |
| F  | 3.508832  | 4.237918  | -1.989250 |
| F  | 3.367248  | 1.582001  | -1.806882 |
| H  | 0.227197  | -0.151465 | 0.075583  |
| Si | -1.416754 | -0.153336 | 0.208280  |
| N  | -3.915330 | 0.177137  | 0.773307  |
| C  | -1.884253 | -1.563310 | -0.914227 |
| C  | -1.861877 | -2.900557 | -0.487434 |
| C  | -2.211619 | -3.928698 | -1.357998 |
| C  | -2.586706 | -3.638988 | -2.668373 |
| C  | -2.613935 | -2.316863 | -3.108280 |
| C  | -2.267034 | -1.287366 | -2.237680 |
| H  | -1.566820 | -3.143496 | 0.525457  |
| H  | -2.188077 | -4.956261 | -1.013554 |
| H  | -2.852430 | -4.441857 | -3.347075 |
| H  | -2.894839 | -2.087861 | -4.129969 |
| H  | -2.280097 | -0.264898 | -2.598089 |
| C  | -4.725132 | 1.103029  | 0.409589  |
| C  | -4.477225 | -1.081663 | 1.138852  |

|   |           |           |           |
|---|-----------|-----------|-----------|
| C | -5.340219 | -1.781576 | 0.289531  |
| C | -5.852635 | -3.014862 | 0.681916  |
| C | -5.511750 | -3.557800 | 1.918634  |
| C | -4.644617 | -2.863920 | 2.761213  |
| C | -4.118213 | -1.636247 | 2.371567  |
| H | -5.576334 | -1.376740 | -0.687568 |
| H | -6.511831 | -3.556381 | 0.013140  |
| H | -5.911943 | -4.518469 | 2.220805  |
| H | -4.374091 | -3.279608 | 3.725062  |
| H | -3.447414 | -1.090093 | 3.023308  |
| H | -1.592872 | 1.179681  | -0.374342 |
| H | -1.406474 | -0.371063 | 1.659095  |
| H | -5.797616 | 0.882363  | 0.359335  |
| C | -4.365305 | 2.481694  | 0.069458  |
| C | -3.219442 | 3.116860  | 0.573358  |
| C | -5.245098 | 3.210329  | -0.746416 |
| C | -2.948124 | 4.438197  | 0.239281  |
| H | -2.561572 | 2.586004  | 1.247966  |
| C | -4.962590 | 4.526264  | -1.092962 |
| H | -6.147521 | 2.735215  | -1.117132 |
| C | -3.812074 | 5.140756  | -0.601575 |
| H | -2.064299 | 4.919370  | 0.639529  |
| H | -5.641426 | 5.074400  | -1.735687 |
| H | -3.594640 | 6.170507  | -0.861033 |

#### B-IM1

Sum of electronic and thermal Free Energies= -3288.388735 Hartree/Particle

|   |           |           |           |
|---|-----------|-----------|-----------|
| C | -1.621763 | -1.412880 | -2.268152 |
| C | -2.164162 | -0.475860 | -1.396096 |
| C | -3.417858 | 0.004714  | -1.773108 |
| C | -4.076098 | -0.387619 | -2.931973 |
| C | -3.478433 | -1.313022 | -3.776710 |
| C | -2.238128 | -1.833914 | -3.439478 |
| B | -1.411614 | 0.024267  | -0.035345 |
| C | -1.709579 | -0.858248 | 1.302162  |
| C | -2.623916 | -1.904097 | 1.406274  |
| C | -2.788026 | -2.663325 | 2.561915  |
| C | -2.013662 | -2.392252 | 3.679472  |
| C | -1.090315 | -1.356954 | 3.626888  |
| C | -0.971358 | -0.620369 | 2.459829  |
| F | -3.417357 | -2.241225 | 0.369345  |
| F | -3.684951 | -3.659445 | 2.602341  |
| F | -2.149527 | -3.122156 | 4.793820  |
| F | -0.317049 | -1.091648 | 4.692832  |

|    |           |           |           |
|----|-----------|-----------|-----------|
| F  | -0.057221 | 0.382189  | 2.472498  |
| F  | -4.073962 | 0.878875  | -0.983210 |
| F  | -5.281147 | 0.111368  | -3.240161 |
| F  | -4.093958 | -1.702720 | -4.899444 |
| F  | -1.649452 | -2.736263 | -4.240859 |
| F  | -0.421120 | -1.987276 | -1.995927 |
| C  | -1.558936 | 1.643456  | 0.161244  |
| C  | -0.879532 | 2.525114  | -0.672584 |
| C  | -0.961595 | 3.906741  | -0.577672 |
| C  | -1.765460 | 4.474326  | 0.398652  |
| C  | -2.480953 | 3.641287  | 1.247271  |
| C  | -2.369346 | 2.261223  | 1.113220  |
| F  | -0.064109 | 2.044652  | -1.651964 |
| F  | -0.248494 | 4.698701  | -1.405220 |
| F  | -1.848229 | 5.805209  | 0.518211  |
| F  | -3.272755 | 4.176508  | 2.185867  |
| F  | -3.115178 | 1.526668  | 1.957277  |
| H  | -0.171291 | -0.167281 | -0.238246 |
| Si | 1.733188  | -0.139200 | -0.388697 |
| N  | 3.737339  | 0.102977  | -0.791582 |
| C  | 1.919794  | -1.675692 | 0.654820  |
| C  | 1.667820  | -2.964487 | 0.160718  |
| C  | 1.828226  | -4.080296 | 0.977983  |
| C  | 2.238027  | -3.927605 | 2.301040  |
| C  | 2.485430  | -2.653931 | 2.809117  |
| C  | 2.328251  | -1.537633 | 1.991694  |
| H  | 1.331412  | -3.099789 | -0.859161 |
| H  | 1.623082  | -5.069056 | 0.583569  |
| H  | 2.352168  | -4.797471 | 2.938195  |
| H  | 2.781599  | -2.527239 | 3.844152  |
| H  | 2.496559  | -0.551826 | 2.411772  |
| C  | 4.529088  | 1.092481  | -0.531888 |
| C  | 4.370731  | -1.112744 | -1.260484 |
| C  | 5.242845  | -1.824108 | -0.437141 |
| C  | 5.834851  | -2.990759 | -0.912098 |
| C  | 5.555005  | -3.446683 | -2.198492 |
| C  | 4.677277  | -2.733746 | -3.012000 |
| C  | 4.076678  | -1.566947 | -2.545692 |
| H  | 5.426840  | -1.484838 | 0.575203  |
| H  | 6.505118  | -3.549233 | -0.269498 |
| H  | 6.014535  | -4.357537 | -2.563402 |
| H  | 4.456790  | -3.082683 | -4.013829 |
| H  | 3.397919  | -1.006248 | -3.175778 |
| H  | 1.637647  | 1.116653  | 0.357338  |

|    |          |           |           |
|----|----------|-----------|-----------|
| H  | 1.424272 | -0.244036 | -1.817020 |
| H  | 5.598634 | 0.888126  | -0.613887 |
| Si | 4.203353 | 2.462394  | -0.158937 |
| Si | 3.047594 | 3.141876  | -0.581751 |
| Si | 5.167075 | 3.154710  | 0.598043  |
| Si | 2.850651 | 4.468506  | -0.219477 |
| H  | 2.322300 | 2.656104  | -1.219694 |
| C  | 4.950905 | 4.470621  | 0.981278  |
| H  | 6.078443 | 2.647745  | 0.896900  |
| C  | 3.790595 | 5.127675  | 0.572790  |
| H  | 1.962458 | 4.984752  | -0.560367 |
| H  | 5.688556 | 4.987550  | 1.583125  |
| H  | 3.625138 | 6.160272  | 0.857472  |

B-IM2

Sum of electronic and thermal Free Energies= -3288.392548 Hartree/Particle

|   |           |           |           |
|---|-----------|-----------|-----------|
| C | -1.866131 | 2.502878  | 0.618957  |
| C | -1.543175 | 1.460522  | -0.248657 |
| C | -0.908549 | 1.866620  | -1.418798 |
| C | -0.589525 | 3.183356  | -1.721333 |
| C | -0.920936 | 4.180123  | -0.816999 |
| C | -1.566458 | 3.837094  | 0.362420  |
| B | -1.810350 | -0.137975 | 0.034322  |
| C | -1.678095 | -0.533565 | 1.624161  |
| C | -0.416626 | -0.650729 | 2.196807  |
| C | -0.173370 | -1.018181 | 3.511434  |
| C | -1.248966 | -1.301627 | 4.339782  |
| C | -2.534856 | -1.199369 | 3.826656  |
| C | -2.723853 | -0.819198 | 2.500785  |
| F | 0.701302  | -0.385404 | 1.449739  |
| F | 1.087632  | -1.103008 | 3.983325  |
| F | -1.048897 | -1.662307 | 5.614748  |
| F | -3.583033 | -1.463500 | 4.620083  |
| F | -4.003393 | -0.727375 | 2.093999  |
| F | -0.521056 | 0.943121  | -2.347540 |
| F | 0.066370  | 3.497349  | -2.853826 |
| F | -0.589284 | 5.457448  | -1.065821 |
| F | -1.878663 | 4.797402  | 1.247479  |
| F | -2.496327 | 2.252235  | 1.781877  |
| C | -3.177769 | -0.675685 | -0.693050 |
| C | -3.210298 | -1.912182 | -1.331217 |
| C | -4.316120 | -2.409763 | -2.009573 |
| C | -5.474468 | -1.649362 | -2.065314 |
| C | -5.500774 | -0.410168 | -1.439757 |

|    |           |           |           |
|----|-----------|-----------|-----------|
| C  | -4.368581 | 0.044207  | -0.774026 |
| F  | -2.115793 | -2.720640 | -1.324722 |
| F  | -4.474646 | 1.247478  | -0.175534 |
| F  | -6.619192 | 0.330140  | -1.483190 |
| F  | -6.555108 | -2.106036 | -2.713331 |
| F  | -4.272806 | -3.611664 | -2.612237 |
| H  | -0.895636 | -0.712052 | -0.499692 |
| C  | 2.130414  | -0.566025 | -1.239881 |
| N  | 2.918804  | 0.059244  | -0.399730 |
| Si | 3.953955  | -0.697841 | 0.946955  |
| C  | 2.864340  | 1.518245  | -0.433155 |
| C  | 2.331395  | 2.235267  | 0.637482  |
| C  | 2.275713  | 3.623272  | 0.556743  |
| C  | 2.745533  | 4.286511  | -0.576140 |
| C  | 3.275970  | 3.559905  | -1.638242 |
| C  | 3.341628  | 2.170280  | -1.570039 |
| H  | 1.923931  | 1.713204  | 1.491562  |
| H  | 1.839166  | 4.185297  | 1.373349  |
| H  | 2.678734  | 5.365731  | -0.636837 |
| H  | 3.627710  | 4.068911  | -2.527119 |
| H  | 3.757876  | 1.595631  | -2.389134 |
| C  | 5.743055  | -0.801848 | 0.425913  |
| C  | 6.407494  | -2.039411 | 0.457854  |
| C  | 7.758612  | -2.133829 | 0.131320  |
| C  | 8.465974  | -0.992192 | -0.236687 |
| C  | 7.823991  | 0.245071  | -0.270711 |
| C  | 6.476451  | 0.341269  | 0.062454  |
| H  | 5.870868  | -2.938079 | 0.745945  |
| H  | 8.257253  | -3.095616 | 0.166568  |
| H  | 9.516994  | -1.064363 | -0.492038 |
| H  | 8.375356  | 1.135285  | -0.550775 |
| H  | 5.998265  | 1.315000  | 0.042006  |
| H  | 1.384807  | 0.052729  | -1.735072 |
| C  | 2.130340  | -1.967784 | -1.585957 |
| C  | 0.902631  | -2.516187 | -2.004770 |
| C  | 3.287127  | -2.772438 | -1.585241 |
| C  | 0.820493  | -3.859449 | -2.343716 |
| H  | 0.013164  | -1.900159 | -2.006599 |
| C  | 3.201748  | -4.103022 | -1.963499 |
| H  | 4.253815  | -2.344590 | -1.351413 |
| C  | 1.967641  | -4.651043 | -2.325798 |
| H  | -0.138644 | -4.278171 | -2.621011 |
| H  | 4.095337  | -4.715104 | -1.986715 |
| H  | 1.906638  | -5.695949 | -2.607824 |

|   |          |           |          |
|---|----------|-----------|----------|
| H | 3.748431 | 0.250720  | 2.052445 |
| H | 3.384743 | -2.030012 | 1.204783 |

PhHC=N<sup>+</sup>Ph(SiH<sub>2</sub>Ph)

Sum of electronic and thermal Free Energies= -1078.850193 Hartree/Particle

|    |           |           |           |
|----|-----------|-----------|-----------|
| C  | 0.601556  | -1.689230 | -0.133333 |
| N  | -0.349357 | -0.948015 | 0.379223  |
| Si | -0.208726 | 0.548979  | 1.501276  |
| C  | -1.715613 | -1.385133 | 0.088799  |
| C  | -2.496482 | -1.960485 | 1.090192  |
| C  | -3.786716 | -2.381365 | 0.781319  |
| C  | -4.291104 | -2.218816 | -0.508626 |
| C  | -3.502663 | -1.639407 | -1.499346 |
| C  | -2.206779 | -1.218835 | -1.205654 |
| H  | -2.100409 | -2.094338 | 2.089245  |
| H  | -4.395907 | -2.840678 | 1.550111  |
| H  | -5.297508 | -2.545583 | -0.740084 |
| H  | -3.891163 | -1.512875 | -2.502503 |
| H  | -1.589669 | -0.755708 | -1.966685 |
| C  | -0.299610 | 2.134608  | 0.543490  |
| C  | 0.769365  | 3.046502  | 0.601635  |
| C  | 0.693646  | 4.273025  | -0.053531 |
| C  | -0.449072 | 4.604626  | -0.777360 |
| C  | -1.521431 | 3.715057  | -0.839243 |
| C  | -1.451818 | 2.492267  | -0.180349 |
| H  | 1.661417  | 2.810623  | 1.173716  |
| H  | 1.521266  | 4.969819  | 0.006351  |
| H  | -0.508843 | 5.559459  | -1.286341 |
| H  | -2.414497 | 3.979810  | -1.392849 |
| H  | -2.304144 | 1.822430  | -0.224641 |
| H  | 0.258680  | -2.624829 | -0.573037 |
| C  | 2.022995  | -1.464588 | -0.192526 |
| C  | 2.829985  | -2.614931 | -0.332951 |
| C  | 2.633623  | -0.193759 | -0.176690 |
| C  | 4.210281  | -2.501330 | -0.383646 |
| H  | 2.365748  | -3.593648 | -0.382111 |
| C  | 4.012525  | -0.088046 | -0.258970 |
| H  | 2.032662  | 0.705539  | -0.168810 |
| C  | 4.801842  | -1.238161 | -0.344590 |
| H  | 4.824516  | -3.388817 | -0.469679 |
| H  | 4.478314  | 0.889541  | -0.270707 |
| H  | 5.879984  | -1.146532 | -0.403248 |
| H  | -1.362142 | 0.312494  | 2.385555  |
| H  | 1.082183  | 0.371704  | 2.191575  |

(C<sub>6</sub>F<sub>5</sub>)<sub>3</sub>B-H<sup>-</sup>

Sum of electronic and thermal Free Energies= -2209.472452 Hartree/Particle

|   |           |           |           |
|---|-----------|-----------|-----------|
| H | 0.001497  | 0.000888  | 1.993276  |
| B | 0.000783  | 0.000253  | 0.789460  |
| C | 1.478813  | 0.563944  | 0.345394  |
| C | 2.596595  | 0.241980  | 1.114515  |
| C | 1.745188  | 1.391696  | -0.742104 |
| C | 3.878258  | 0.709445  | 0.847711  |
| C | 3.009422  | 1.886132  | -1.043844 |
| C | 4.086503  | 1.542910  | -0.241145 |
| C | -0.249632 | -1.561946 | 0.346412  |
| C | -1.083964 | -2.370580 | 1.117453  |
| C | 0.329616  | -2.204073 | -0.744904 |
| C | -1.321034 | -3.713763 | 0.848647  |
| C | 0.124488  | -3.545379 | -1.048750 |
| C | -0.707552 | -4.308445 | -0.243793 |
| C | -1.227234 | 0.997715  | 0.345967  |
| C | -1.512628 | 2.122895  | 1.118604  |
| C | -2.072705 | 0.817107  | -0.745685 |
| C | -2.558554 | 2.998553  | 0.850740  |
| C | -3.132892 | 1.664426  | -1.048727 |
| C | -3.379438 | 2.765155  | -0.242407 |
| F | 2.475879  | -0.568986 | 2.187588  |
| F | 4.920842  | 0.367560  | 1.631463  |
| F | 5.319344  | 2.008057  | -0.518248 |
| F | 3.205284  | 2.687129  | -2.110253 |
| F | 0.757497  | 1.753304  | -1.590991 |
| F | -2.788614 | 4.069070  | 1.637670  |
| F | -0.755115 | 2.421424  | 2.195954  |
| F | -4.398742 | 3.599892  | -0.520419 |
| F | -3.919567 | 1.437128  | -2.119534 |
| F | -1.885931 | -0.214945 | -1.598231 |
| F | 1.132296  | -1.527174 | -1.595880 |
| F | -1.723029 | -1.862639 | 2.193161  |
| F | 0.715147  | -4.113233 | -2.119181 |
| F | -0.922175 | -5.608101 | -0.522868 |
| F | -2.135885 | -4.447237 | 1.633650  |

B-TS2

Sum of electronic and thermal Free Energies= -3288.382749 Hartree/Particle

|   |           |          |           |
|---|-----------|----------|-----------|
| C | -1.743079 | 2.759193 | 0.338833  |
| C | -1.237342 | 1.707631 | -0.427369 |
| C | -0.608811 | 2.115436 | -1.604817 |



|    |           |           |           |
|----|-----------|-----------|-----------|
| C  | -0.464594 | 3.432283  | -2.003799 |
| C  | -0.982152 | 4.439881  | -1.201089 |
| C  | -1.630189 | 4.098694  | -0.025867 |
| B  | -1.323177 | 0.131702  | -0.018787 |
| C  | -1.834674 | -0.159805 | 1.499592  |
| C  | -0.999981 | -0.236544 | 2.604802  |
| C  | -1.437513 | -0.490601 | 3.897762  |
| C  | -2.793169 | -0.672794 | 4.126615  |
| C  | -3.677581 | -0.592047 | 3.058306  |
| C  | -3.188674 | -0.340752 | 1.783229  |
| F  | 0.343781  | -0.063971 | 2.456453  |
| F  | -0.566227 | -0.565203 | 4.915565  |
| F  | -3.243714 | -0.919188 | 5.361132  |
| F  | -4.989738 | -0.751374 | 3.271021  |
| F  | -4.102165 | -0.240575 | 0.797753  |
| F  | -0.084670 | 1.183287  | -2.443338 |
| F  | 0.181732  | 3.744899  | -3.135838 |
| F  | -0.834451 | 5.722529  | -1.549462 |
| F  | -2.127902 | 5.061866  | 0.762023  |
| F  | -2.385174 | 2.534907  | 1.502060  |
| C  | -2.021990 | -0.869794 | -1.096831 |
| C  | -2.013486 | -2.248585 | -0.870039 |
| C  | -2.580486 | -3.184347 | -1.723250 |
| C  | -3.224594 | -2.749195 | -2.872617 |
| C  | -3.291443 | -1.388922 | -3.134365 |
| C  | -2.706385 | -0.485897 | -2.252891 |
| F  | -1.440212 | -2.742183 | 0.249304  |
| F  | -2.866633 | 0.812788  | -2.570141 |
| F  | -3.929061 | -0.955254 | -4.229920 |
| F  | -3.779325 | -3.629281 | -3.712059 |
| F  | -2.519088 | -4.494584 | -1.445444 |
| H  | -0.027337 | -0.254434 | -0.013233 |
| C  | 1.495791  | -0.496401 | -0.421628 |
| N  | 2.305796  | 0.225357  | 0.383218  |
| Si | 3.488207  | -0.357987 | 1.647112  |
| C  | 2.443782  | 1.636645  | 0.066160  |
| C  | 1.986095  | 2.597374  | 0.968357  |
| C  | 2.136621  | 3.947958  | 0.667593  |
| C  | 2.738440  | 4.340713  | -0.527240 |
| C  | 3.195947  | 3.377833  | -1.423203 |
| C  | 3.058699  | 2.024040  | -1.125237 |
| H  | 1.502095  | 2.282210  | 1.883907  |
| H  | 1.770978  | 4.694036  | 1.363292  |
| H  | 2.841627  | 5.393406  | -0.762104 |

|   |          |           |           |
|---|----------|-----------|-----------|
| H | 3.660469 | 3.676899  | -2.355069 |
| H | 3.428132 | 1.270264  | -1.810533 |
| C | 5.092062 | -0.856184 | 0.825952  |
| C | 5.306934 | -2.170167 | 0.375877  |
| C | 6.508599 | -2.529446 | -0.228366 |
| C | 7.517705 | -1.582268 | -0.393154 |
| C | 7.324602 | -0.275421 | 0.049485  |
| C | 6.122544 | 0.083586  | 0.654244  |
| H | 4.533614 | -2.921071 | 0.499289  |
| H | 6.658984 | -3.548228 | -0.567361 |
| H | 8.454358 | -1.863482 | -0.861388 |
| H | 8.110314 | 0.461733  | -0.071739 |
| H | 5.990225 | 1.103412  | 1.000825  |
| H | 1.263706 | -0.016429 | -1.363705 |
| C | 1.543972 | -1.976922 | -0.493472 |
| C | 1.761203 | -2.536428 | -1.760748 |
| C | 1.387699 | -2.825755 | 0.608687  |
| C | 1.872959 | -3.914645 | -1.914448 |
| H | 1.849945 | -1.888698 | -2.625802 |
| C | 1.489482 | -4.202579 | 0.449979  |
| H | 1.136788 | -2.412862 | 1.574765  |
| C | 1.742176 | -4.749741 | -0.807400 |
| H | 2.047557 | -4.334139 | -2.898124 |
| H | 1.344696 | -4.851347 | 1.305515  |
| H | 1.812210 | -5.824665 | -0.927014 |
| H | 3.699663 | 0.832400  | 2.491898  |
| H | 2.912991 | -1.467277 | 2.420601  |

### B-IM3

Sum of electronic and thermal Free Energies= -3288.428895 Hartree/Particle

|   |           |           |           |
|---|-----------|-----------|-----------|
| C | 2.302931  | -3.013860 | -0.248150 |
| C | 2.258900  | -1.661799 | -0.617002 |
| C | 2.044160  | -1.414074 | -1.980231 |
| C | 1.866215  | -2.424382 | -2.911484 |
| C | 1.921852  | -3.749567 | -2.495900 |
| C | 2.150383  | -4.048818 | -1.157136 |
| B | 2.418054  | -0.507815 | 0.423449  |
| C | 1.876444  | -0.666348 | 1.887674  |
| C | 0.627089  | -1.230267 | 2.165055  |
| C | 0.121582  | -1.340630 | 3.451163  |
| C | 0.888854  | -0.899115 | 4.523975  |
| C | 2.144361  | -0.346013 | 4.298060  |
| C | 2.607665  | -0.227557 | 2.995845  |
| F | -0.156742 | -1.652363 | 1.160588  |

|    |           |           |           |
|----|-----------|-----------|-----------|
| F  | -1.091966 | -1.854211 | 3.669850  |
| F  | 0.422182  | -1.006515 | 5.764839  |
| F  | 2.884528  | 0.066462  | 5.329855  |
| F  | 3.828412  | 0.307088  | 2.827000  |
| F  | 1.963523  | -0.154448 | -2.435700 |
| F  | 1.636407  | -2.140846 | -4.195520 |
| F  | 1.760097  | -4.730381 | -3.377647 |
| F  | 2.218232  | -5.322773 | -0.764069 |
| F  | 2.531746  | -3.359565 | 1.027866  |
| C  | 3.104703  | 0.844500  | 0.016159  |
| C  | 2.571691  | 2.081779  | 0.386314  |
| C  | 3.144570  | 3.290445  | 0.021881  |
| C  | 4.322187  | 3.286465  | -0.717077 |
| C  | 4.900283  | 2.078615  | -1.093923 |
| C  | 4.282308  | 0.889864  | -0.735603 |
| F  | 1.424676  | 2.139080  | 1.090427  |
| F  | 4.876087  | -0.251136 | -1.119799 |
| F  | 6.035392  | 2.077306  | -1.796053 |
| F  | 4.893971  | 4.435726  | -1.065381 |
| F  | 2.576883  | 4.449355  | 0.368415  |
| H  | -2.211922 | 1.721029  | 1.307333  |
| C  | -2.051556 | 1.519666  | 0.245355  |
| N  | -2.838178 | 0.332564  | -0.100753 |
| Si | -3.819972 | -0.438801 | 1.150995  |
| C  | -2.581537 | -0.295036 | -1.338046 |
| C  | -3.368370 | -1.385063 | -1.758994 |
| C  | -3.107136 | -2.043834 | -2.953746 |
| C  | -2.064008 | -1.633800 | -3.781837 |
| C  | -1.296090 | -0.541032 | -3.391781 |
| C  | -1.546389 | 0.124240  | -2.193938 |
| H  | -4.208506 | -1.713188 | -1.159320 |
| H  | -3.735101 | -2.879976 | -3.241623 |
| H  | -1.863305 | -2.145107 | -4.715671 |
| H  | -0.488861 | -0.191607 | -4.025231 |
| H  | -0.938633 | 0.981597  | -1.943662 |
| C  | -5.679243 | -0.400446 | 0.860539  |
| C  | -6.371716 | 0.806302  | 0.666625  |
| C  | -7.753476 | 0.822570  | 0.497864  |
| C  | -8.473936 | -0.370975 | 0.522331  |
| C  | -7.807713 | -1.578050 | 0.716997  |
| C  | -6.423722 | -1.589735 | 0.883659  |
| H  | -5.829817 | 1.746722  | 0.647750  |
| H  | -8.269197 | 1.764918  | 0.349063  |
| H  | -9.550271 | -0.358723 | 0.390969  |

|   |           |           |           |
|---|-----------|-----------|-----------|
| H | -8.363639 | -2.508978 | 0.737773  |
| H | -5.918342 | -2.539241 | 1.033473  |
| H | -0.980201 | 1.307365  | 0.146958  |
| C | -2.375009 | 2.794104  | -0.526052 |
| C | -3.553367 | 2.947242  | -1.257007 |
| C | -1.476420 | 3.865388  | -0.465020 |
| C | -3.833180 | 4.149232  | -1.906677 |
| H | -4.245697 | 2.117727  | -1.330705 |
| C | -1.756398 | 5.066906  | -1.109366 |
| H | -0.549695 | 3.758330  | 0.090856  |
| C | -2.939082 | 5.213579  | -1.833026 |
| H | -4.750704 | 4.249304  | -2.476159 |
| H | -1.048863 | 5.886674  | -1.050319 |
| H | -3.156857 | 6.147001  | -2.339690 |
| H | -3.436450 | -1.864766 | 1.306006  |
| H | -3.495195 | 0.327294  | 2.379248  |

PhH<sub>2</sub>C-NPhSiH<sub>2</sub>Ph

Sum of electronic and thermal Free Energies= -1079.673560 Hartree/Particle

|    |           |           |           |
|----|-----------|-----------|-----------|
| H  | -1.235805 | -0.744249 | 2.413589  |
| C  | -1.517634 | -0.086284 | 1.588104  |
| N  | -0.299621 | 0.576595  | 1.114861  |
| Si | 1.257334  | 0.078983  | 1.785162  |
| C  | -0.440700 | 1.721722  | 0.300313  |
| C  | 0.696701  | 2.389325  | -0.193905 |
| C  | 0.579247  | 3.535539  | -0.969853 |
| C  | -0.672832 | 4.054689  | -1.291515 |
| C  | -1.805031 | 3.393993  | -0.826399 |
| C  | -1.699702 | 2.244871  | -0.047387 |
| H  | 1.688237  | 2.006256  | 0.013273  |
| H  | 1.479596  | 4.021312  | -1.329989 |
| H  | -0.762376 | 4.947097  | -1.899300 |
| H  | -2.792436 | 3.768305  | -1.074358 |
| H  | -2.607071 | 1.752122  | 0.270621  |
| C  | 2.470846  | -0.677815 | 0.562081  |
| C  | 2.146448  | -1.822828 | -0.184302 |
| C  | 3.069806  | -2.400239 | -1.051537 |
| C  | 4.341187  | -1.844539 | -1.188798 |
| C  | 4.684732  | -0.712004 | -0.455217 |
| C  | 3.756461  | -0.136206 | 0.410713  |
| H  | 1.163252  | -2.272821 | -0.089069 |
| H  | 2.799563  | -3.284054 | -1.618952 |
| H  | 5.060668  | -2.294043 | -1.864224 |
| H  | 5.672669  | -0.276575 | -0.557567 |

|   |           |           |           |
|---|-----------|-----------|-----------|
| H | 4.039634  | 0.746938  | 0.975771  |
| H | -2.200200 | 0.654541  | 2.023066  |
| C | -2.277384 | -0.922582 | 0.563691  |
| C | -1.750528 | -1.239520 | -0.688416 |
| C | -3.538956 | -1.421468 | 0.907265  |
| C | -2.466241 | -2.043280 | -1.576128 |
| H | -0.784078 | -0.844465 | -0.975356 |
| C | -4.252974 | -2.226376 | 0.025068  |
| H | -3.965703 | -1.178247 | 1.876306  |
| C | -3.716817 | -2.541460 | -1.223082 |
| H | -2.044522 | -2.274044 | -2.548270 |
| H | -5.228515 | -2.605248 | 0.309511  |
| H | -4.272589 | -3.164978 | -1.914249 |
| H | 1.949279  | 1.234085  | 2.415535  |
| H | 0.895284  | -0.927079 | 2.813198  |

#### B-IM4

Sum of electronic and thermal Free Energies= -3364.877062 Hartree/Particle

|   |           |           |           |
|---|-----------|-----------|-----------|
| C | -3.070637 | -0.532161 | -2.175203 |
| C | -2.030447 | -0.704197 | -1.262953 |
| C | -1.063368 | -1.630933 | -1.647556 |
| C | -1.075208 | -2.317781 | -2.851037 |
| C | -2.126417 | -2.102687 | -3.732643 |
| C | -3.132468 | -1.209794 | -3.388868 |
| B | -1.906916 | 0.033634  | 0.189706  |
| C | -2.040158 | -1.080810 | 1.371959  |
| C | -3.246161 | -1.774748 | 1.483644  |
| C | -3.473621 | -2.779083 | 2.412423  |
| C | -2.452474 | -3.147016 | 3.281137  |
| C | -1.227091 | -2.503346 | 3.198982  |
| C | -1.053139 | -1.498674 | 2.255103  |
| F | -4.263698 | -1.459715 | 0.661114  |
| F | -4.656631 | -3.396756 | 2.478205  |
| F | -2.647189 | -4.114611 | 4.179231  |
| F | -0.224630 | -2.856265 | 4.012202  |
| F | 0.195244  | -0.939794 | 2.218876  |
| F | -0.025884 | -1.897527 | -0.808642 |
| F | -0.093317 | -3.171527 | -3.167344 |
| F | -2.168391 | -2.749165 | -4.899484 |
| F | -4.150804 | -1.005068 | -4.230790 |
| F | -4.084306 | 0.309765  | -1.913543 |
| C | -2.754751 | 1.412275  | 0.364442  |
| C | -2.511944 | 2.459195  | -0.523595 |
| C | -3.144651 | 3.689458  | -0.478747 |

|    |           |           |           |
|----|-----------|-----------|-----------|
| C  | -4.085450 | 3.919206  | 0.518031  |
| C  | -4.355395 | 2.919771  | 1.440426  |
| C  | -3.687534 | 1.700052  | 1.358016  |
| F  | -1.586859 | 2.286234  | -1.508252 |
| F  | -3.994439 | 0.803015  | 2.311651  |
| F  | -5.247362 | 3.138562  | 2.412535  |
| F  | -4.713173 | 5.094488  | 0.591821  |
| F  | -2.858968 | 4.647888  | -1.367668 |
| O  | -0.370412 | 0.618458  | 0.259222  |
| C  | 3.112818  | -1.464677 | 0.406666  |
| N  | 2.914957  | -0.013885 | 0.234148  |
| Si | 3.273054  | 1.042404  | 1.623218  |
| C  | 4.497794  | -2.017063 | 0.095006  |
| C  | 4.818064  | -3.302734 | 0.547362  |
| C  | 6.058917  | -3.867998 | 0.272948  |
| C  | 7.006249  | -3.152868 | -0.459162 |
| C  | 6.699174  | -1.872980 | -0.910355 |
| C  | 5.452887  | -1.308038 | -0.635285 |
| C  | 2.554276  | 0.473162  | -1.039344 |
| C  | 2.537613  | -0.345011 | -2.185589 |
| C  | 2.125784  | 0.157518  | -3.416344 |
| C  | 1.721971  | 1.482574  | -3.558626 |
| C  | 1.743896  | 2.308018  | -2.438063 |
| C  | 2.148909  | 1.816798  | -1.198479 |
| C  | 4.654635  | 2.287101  | 1.373967  |
| C  | 4.376914  | 3.662815  | 1.402687  |
| C  | 5.393027  | 4.606265  | 1.264604  |
| C  | 6.710541  | 4.187902  | 1.097433  |
| C  | 7.008914  | 2.826205  | 1.073301  |
| C  | 5.991555  | 1.886217  | 1.211209  |
| H  | 3.356102  | 4.005964  | 1.541574  |
| H  | 5.156731  | 5.664208  | 1.289067  |
| H  | 7.503526  | 4.919644  | 0.990457  |
| H  | 8.034926  | 2.497425  | 0.950774  |
| H  | 6.244840  | 0.831445  | 1.195554  |
| H  | 2.871433  | -1.711661 | 1.442794  |
| H  | 2.859126  | -1.374953 | -2.128522 |
| H  | 2.126912  | -0.504806 | -4.274955 |
| H  | 1.403707  | 1.865022  | -4.520405 |
| H  | 1.440995  | 3.345774  | -2.518411 |
| H  | 2.166421  | 2.495442  | -0.354257 |
| H  | 4.088997  | -3.864347 | 1.123988  |
| H  | 6.289336  | -4.863775 | 0.634848  |
| H  | 7.974674  | -3.590461 | -0.672985 |

|   |           |           |           |
|---|-----------|-----------|-----------|
| H | 7.427790  | -1.308585 | -1.481766 |
| H | 5.226554  | -0.311977 | -0.994582 |
| H | 0.323894  | 0.008286  | 0.559280  |
| H | -0.061739 | 1.074132  | -0.545582 |
| H | 2.367826  | -1.990988 | -0.197382 |
| H | 2.056040  | 1.820837  | 1.977766  |
| H | 3.597848  | 0.083740  | 2.702176  |

B-TS3

Sum of electronic and thermal Free Energies= -3364.871607 Hartree/Particle

|   |           |           |           |
|---|-----------|-----------|-----------|
| C | 3.005184  | 1.037038  | 1.815082  |
| C | 2.056299  | 1.182500  | 0.802334  |
| C | 1.648619  | 2.494632  | 0.585626  |
| C | 2.113664  | 3.582626  | 1.317715  |
| C | 3.049924  | 3.378608  | 2.318785  |
| C | 3.501145  | 2.088500  | 2.571054  |
| B | 1.603891  | -0.132600 | -0.090681 |
| C | 0.889927  | -1.347880 | 0.755134  |
| C | 0.436775  | -1.273504 | 2.069737  |
| C | -0.178424 | -2.327218 | 2.737793  |
| C | -0.378180 | -3.530127 | 2.078707  |
| C | 0.030697  | -3.651193 | 0.757113  |
| C | 0.639411  | -2.572518 | 0.130658  |
| F | 0.530855  | -0.122265 | 2.777636  |
| F | -0.604853 | -2.175849 | 4.000160  |
| F | -0.976412 | -4.551361 | 2.698398  |
| F | -0.184429 | -4.796465 | 0.096810  |
| F | 0.986454  | -2.756297 | -1.158343 |
| F | 0.736316  | 2.797670  | -0.381100 |
| F | 1.665663  | 4.819916  | 1.060542  |
| F | 3.511958  | 4.408779  | 3.034486  |
| F | 4.403356  | 1.877045  | 3.536926  |
| F | 3.473047  | -0.192890 | 2.107611  |
| C | 2.946766  | -0.587680 | -0.942320 |
| C | 3.360173  | 0.167313  | -2.036528 |
| C | 4.491943  | -0.095054 | -2.793734 |
| C | 5.290230  | -1.176662 | -2.448033 |
| C | 4.935057  | -1.959289 | -1.358728 |
| C | 3.787272  | -1.655827 | -0.633028 |
| F | 2.633387  | 1.263282  | -2.413458 |
| F | 3.519501  | -2.468687 | 0.405607  |
| F | 5.699726  | -3.003969 | -1.017875 |
| F | 6.388524  | -1.458686 | -3.155861 |
| F | 4.819999  | 0.677196  | -3.838167 |

|    |           |           |           |
|----|-----------|-----------|-----------|
| O  | 0.519580  | 0.250089  | -1.124916 |
| C  | -1.952232 | 1.376216  | 0.590437  |
| N  | -1.925398 | 0.658086  | -0.743886 |
| Si | -2.680950 | -1.038823 | -0.759188 |
| C  | -3.188715 | 1.257579  | 1.462177  |
| C  | -3.019886 | 0.806325  | 2.778077  |
| C  | -4.095738 | 0.749115  | 3.660252  |
| C  | -5.364186 | 1.140214  | 3.239227  |
| C  | -5.548112 | 1.580440  | 1.930587  |
| C  | -4.471283 | 1.639612  | 1.049631  |
| C  | -2.226581 | 1.456695  | -1.935224 |
| C  | -2.872822 | 2.692036  | -1.887479 |
| C  | -3.100450 | 3.408811  | -3.061517 |
| C  | -2.689904 | 2.907384  | -4.291867 |
| C  | -2.032150 | 1.680885  | -4.340660 |
| C  | -1.795515 | 0.961164  | -3.173309 |
| C  | -4.501264 | -1.118047 | -1.162103 |
| C  | -4.984824 | -0.896842 | -2.463395 |
| C  | -6.338789 | -1.036085 | -2.754211 |
| C  | -7.232527 | -1.412706 | -1.753083 |
| C  | -6.770089 | -1.646969 | -0.460187 |
| C  | -5.417090 | -1.497774 | -0.166948 |
| H  | -4.303351 | -0.614705 | -3.258366 |
| H  | -6.695221 | -0.858480 | -3.762553 |
| H  | -8.286002 | -1.528547 | -1.982143 |
| H  | -7.461296 | -1.945279 | 0.319819  |
| H  | -5.074271 | -1.675658 | 0.846490  |
| H  | -1.110446 | 0.976131  | 1.154535  |
| H  | -3.194356 | 3.116388  | -0.947474 |
| H  | -3.601278 | 4.368174  | -3.004015 |
| H  | -2.868508 | 3.470121  | -5.200123 |
| H  | -1.686005 | 1.283250  | -5.287538 |
| H  | -1.259507 | 0.021596  | -3.223660 |
| H  | -2.036295 | 0.499133  | 3.116532  |
| H  | -3.939664 | 0.397461  | 4.673508  |
| H  | -6.203535 | 1.099246  | 3.923999  |
| H  | -6.533277 | 1.877720  | 1.590066  |
| H  | -4.648627 | 1.966150  | 0.033358  |
| H  | -0.668806 | 0.424374  | -0.890261 |
| H  | 0.837929  | 0.937804  | -1.723731 |
| H  | -1.708141 | 2.419613  | 0.389368  |
| H  | -1.883868 | -1.747586 | -1.780393 |
| H  | -2.414270 | -1.558410 | 0.594152  |



## B-IM5

Sum of electronic and thermal Free Energies= -3364.874538 Hartree/Particle

|    |           |           |           |
|----|-----------|-----------|-----------|
| C  | -3.589987 | 2.031368  | 0.204842  |
| C  | -2.376277 | 1.485911  | -0.205059 |
| C  | -1.575210 | 2.365958  | -0.930005 |
| C  | -1.917955 | 3.671280  | -1.241946 |
| C  | -3.144237 | 4.163768  | -0.814089 |
| C  | -3.983866 | 3.336621  | -0.085888 |
| B  | -1.770188 | -0.009936 | 0.174466  |
| C  | -1.370278 | -0.924312 | -1.153227 |
| C  | -1.740961 | -0.685804 | -2.475883 |
| C  | -1.326853 | -1.474755 | -3.545810 |
| C  | -0.504833 | -2.568523 | -3.316263 |
| C  | -0.133262 | -2.866872 | -2.013632 |
| C  | -0.582745 | -2.061558 | -0.974641 |
| F  | -2.539709 | 0.348202  | -2.794785 |
| F  | -1.706327 | -1.184018 | -4.797217 |
| F  | -0.075468 | -3.324856 | -4.333218 |
| F  | 0.683731  | -3.910127 | -1.771525 |
| F  | -0.196613 | -2.441283 | 0.268356  |
| F  | -0.362727 | 1.947558  | -1.389160 |
| F  | -1.087086 | 4.457714  | -1.944997 |
| F  | -3.503912 | 5.421710  | -1.096386 |
| F  | -5.165511 | 3.802751  | 0.342119  |
| F  | -4.470656 | 1.316611  | 0.935015  |
| C  | -2.804780 | -0.920287 | 1.091928  |
| C  | -2.643430 | -1.232019 | 2.435700  |
| C  | -3.507308 | -2.041893 | 3.163461  |
| C  | -4.614646 | -2.584982 | 2.531373  |
| C  | -4.835936 | -2.298952 | 1.189917  |
| C  | -3.941198 | -1.484455 | 0.511291  |
| F  | -1.587873 | -0.725847 | 3.149244  |
| F  | -4.231474 | -1.218483 | -0.778642 |
| F  | -5.910068 | -2.806985 | 0.571592  |
| F  | -5.463224 | -3.368814 | 3.205969  |
| F  | -3.279609 | -2.299260 | 4.459693  |
| O  | -0.468092 | 0.256001  | 0.911167  |
| C  | 2.240663  | 0.378500  | -1.167956 |
| N  | 2.142592  | 0.533600  | 0.364132  |
| Si | 2.688765  | -0.923590 | 1.441797  |
| C  | 3.539821  | -0.132122 | -1.737216 |
| C  | 3.679979  | -1.490211 | -2.053128 |
| C  | 4.850498  | -1.966394 | -2.640379 |
| C  | 5.895278  | -1.090080 | -2.924804 |

|   |           |           |           |
|---|-----------|-----------|-----------|
| C | 5.757709  | 0.267071  | -2.637408 |
| C | 4.585296  | 0.743037  | -2.057389 |
| C | 2.571177  | 1.856735  | 0.863738  |
| C | 3.920841  | 2.197640  | 0.941729  |
| C | 4.279144  | 3.464933  | 1.396856  |
| C | 3.301500  | 4.380773  | 1.777300  |
| C | 1.956518  | 4.027912  | 1.702075  |
| C | 1.584975  | 2.766970  | 1.242818  |
| C | 4.463153  | -0.890398 | 2.004229  |
| C | 4.763615  | -0.399195 | 3.286940  |
| C | 6.068505  | -0.418548 | 3.771020  |
| C | 7.095151  | -0.932640 | 2.981698  |
| C | 6.814577  | -1.431620 | 1.710688  |
| C | 5.509823  | -1.414490 | 1.226196  |
| H | 3.973755  | -0.001065 | 3.915151  |
| H | 6.282514  | -0.037879 | 4.763090  |
| H | 8.111448  | -0.950832 | 3.358949  |
| H | 7.611030  | -1.838938 | 1.098511  |
| H | 5.309200  | -1.809544 | 0.237036  |
| H | 1.428377  | -0.298791 | -1.426733 |
| H | 4.686242  | 1.489061  | 0.660346  |
| H | 5.328084  | 3.729945  | 1.457805  |
| H | 3.586767  | 5.364222  | 2.131845  |
| H | 1.188835  | 4.734011  | 1.995131  |
| H | 0.542341  | 2.483918  | 1.178248  |
| H | 2.862860  | -2.177708 | -1.864385 |
| H | 4.936568  | -3.017739 | -2.889298 |
| H | 6.802984  | -1.458181 | -3.389096 |
| H | 6.555988  | 0.958068  | -2.882670 |
| H | 4.472718  | 1.804507  | -1.869510 |
| H | 1.081791  | 0.483232  | 0.531889  |
| H | -0.590796 | 0.116837  | 1.854409  |
| H | 1.989227  | 1.359023  | -1.567718 |
| H | 1.797964  | -0.744086 | 2.604094  |
| H | 2.358893  | -2.095391 | 0.618198  |

B-TS4

Sum of electronic and thermal Free Energies= -3364.866229 Hartree/Particle

|   |           |           |           |
|---|-----------|-----------|-----------|
| C | -5.378972 | -2.271669 | 0.111434  |
| C | -4.066567 | -2.306786 | -0.389292 |
| C | -3.774516 | -3.183910 | -1.447240 |
| C | -4.768845 | -3.984352 | -2.000805 |
| C | -6.068195 | -3.929051 | -1.499018 |
| C | -6.372555 | -3.075814 | -0.440149 |

|    |           |           |           |
|----|-----------|-----------|-----------|
| Si | -2.723910 | -1.300462 | 0.410456  |
| N  | -2.204440 | 0.242491  | -0.578994 |
| C  | -2.864408 | 0.464064  | -1.879876 |
| C  | -4.253503 | 0.486267  | -1.987519 |
| C  | -4.843654 | 0.719298  | -3.227051 |
| C  | -4.054174 | 0.931612  | -4.354357 |
| C  | -2.666859 | 0.920165  | -4.237728 |
| C  | -2.067689 | 0.690763  | -3.001703 |
| C  | -2.043244 | 1.550095  | 0.239866  |
| C  | -3.284595 | 2.141981  | 0.851327  |
| C  | -3.562056 | 1.947738  | 2.210681  |
| C  | -4.677283 | 2.537392  | 2.800091  |
| C  | -5.526020 | 3.338964  | 2.040132  |
| C  | -5.244429 | 3.563966  | 0.693940  |
| C  | -4.127461 | 2.976755  | 0.106247  |
| O  | 0.383435  | -0.426206 | -0.945776 |
| B  | 1.585994  | -0.177786 | -0.065793 |
| C  | 2.926562  | -0.920045 | -0.723510 |
| C  | 3.158860  | -0.847155 | -2.094472 |
| C  | 4.264536  | -1.378471 | -2.742272 |
| C  | 5.232374  | -2.026432 | -1.988803 |
| C  | 5.063229  | -2.123837 | -0.615309 |
| C  | 3.933353  | -1.576593 | -0.015335 |
| F  | 2.258198  | -0.204683 | -2.903097 |
| F  | 4.406546  | -1.269209 | -4.071369 |
| F  | 6.312346  | -2.550496 | -2.579583 |
| F  | 5.990621  | -2.750162 | 0.121356  |
| F  | 3.856758  | -1.728040 | 1.320172  |
| C  | 1.999332  | 1.435942  | -0.005401 |
| C  | 3.011485  | 1.876497  | 0.848639  |
| C  | 3.463606  | 3.186546  | 0.912876  |
| C  | 2.896452  | 4.143383  | 0.080450  |
| C  | 1.890472  | 3.762044  | -0.792193 |
| C  | 1.475591  | 2.434083  | -0.819044 |
| F  | 3.596631  | 0.999358  | 1.689231  |
| F  | 0.475360  | 2.171763  | -1.711248 |
| F  | 1.322080  | 4.671916  | -1.599800 |
| F  | 3.312867  | 5.414275  | 0.124128  |
| F  | 4.434287  | 3.540002  | 1.765814  |
| C  | 1.115341  | -0.801501 | 1.392090  |
| C  | 0.628155  | -0.060330 | 2.463876  |
| C  | 0.136665  | -0.619765 | 3.640109  |
| C  | 0.125512  | -1.997406 | 3.786781  |
| C  | 0.587001  | -2.787934 | 2.742082  |

|   |           |           |           |
|---|-----------|-----------|-----------|
| C | 1.048595  | -2.183685 | 1.580213  |
| F | 0.553045  | 1.293992  | 2.401419  |
| F | -0.353673 | 0.163105  | 4.615960  |
| F | -0.343941 | -2.558372 | 4.907017  |
| F | 0.554676  | -4.123058 | 2.857088  |
| F | 1.419196  | -3.022001 | 0.592921  |
| H | -2.765129 | -3.248432 | -1.840233 |
| H | -4.529450 | -4.655893 | -2.817171 |
| H | -6.840950 | -4.557247 | -1.927419 |
| H | -7.379865 | -3.041608 | -0.041159 |
| H | -5.627768 | -1.617259 | 0.940971  |
| H | -1.309642 | 1.319383  | 1.010150  |
| H | -4.877005 | 0.326417  | -1.119659 |
| H | -5.924120 | 0.731145  | -3.306848 |
| H | -4.517829 | 1.108827  | -5.317589 |
| H | -2.042452 | 1.094492  | -5.105699 |
| H | -0.990994 | 0.717513  | -2.909441 |
| H | -2.886304 | 1.356637  | 2.818756  |
| H | -4.872248 | 2.383147  | 3.854954  |
| H | -6.390796 | 3.803715  | 2.499734  |
| H | -5.884794 | 4.210560  | 0.105064  |
| H | -3.900307 | 3.179748  | -0.933623 |
| H | -1.176107 | 0.000041  | -0.781897 |
| H | 0.650472  | -0.362100 | -1.867592 |
| H | -1.577062 | 2.244436  | -0.457782 |
| H | -3.161211 | -0.779738 | 1.716332  |
| H | -1.455635 | -2.038630 | 0.473244  |

#### B-IM6

Sum of electronic and thermal Free Energies= -3364.877203 Hartree/Particle

|    |          |          |           |
|----|----------|----------|-----------|
| C  | 3.775441 | 3.824137 | -0.327390 |
| C  | 2.656206 | 3.004779 | -0.098647 |
| C  | 1.374476 | 3.525938 | -0.350678 |
| C  | 1.225090 | 4.825864 | -0.824792 |
| C  | 2.345094 | 5.624486 | -1.049723 |
| C  | 3.621067 | 5.124151 | -0.800029 |
| Si | 2.913524 | 1.306045 | 0.603872  |
| N  | 2.439855 | 0.005045 | -0.678929 |
| C  | 3.094141 | 0.183742 | -1.989609 |
| C  | 4.468356 | 0.398087 | -2.078477 |
| C  | 5.059077 | 0.557265 | -3.330396 |
| C  | 4.284722 | 0.502545 | -4.485895 |
| C  | 2.913234 | 0.281304 | -4.388353 |
| C  | 2.313617 | 0.118892 | -3.142507 |

|   |           |           |           |
|---|-----------|-----------|-----------|
| C | 2.454495  | -1.460452 | -0.182446 |
| C | 3.722573  | -1.922401 | 0.484410  |
| C | 3.817937  | -1.922614 | 1.881513  |
| C | 4.975275  | -2.371022 | 2.512890  |
| C | 6.048188  | -2.834726 | 1.755205  |
| C | 5.953914  | -2.863839 | 0.364885  |
| C | 4.796383  | -2.416512 | -0.266047 |
| O | -0.213966 | 0.544179  | -0.783624 |
| B | -1.358862 | -0.056095 | 0.004151  |
| C | -2.788635 | 0.672810  | -0.445950 |
| C | -3.054176 | 0.904685  | -1.793084 |
| C | -4.227852 | 1.454637  | -2.287585 |
| C | -5.232609 | 1.797238  | -1.394386 |
| C | -5.031840 | 1.581483  | -0.038659 |
| C | -3.833894 | 1.030465  | 0.405721  |
| F | -2.116967 | 0.573474  | -2.735629 |
| F | -4.399541 | 1.651509  | -3.602801 |
| F | -6.377960 | 2.329409  | -1.835353 |
| F | -5.994796 | 1.911659  | 0.832124  |
| F | -3.730806 | 0.865510  | 1.737654  |
| C | -1.589901 | -1.668765 | -0.340764 |
| C | -2.536876 | -2.412477 | 0.365211  |
| C | -2.841334 | -3.739939 | 0.101201  |
| C | -2.182498 | -4.396666 | -0.930872 |
| C | -1.235291 | -3.706122 | -1.669069 |
| C | -0.969818 | -2.374495 | -1.364958 |
| F | -3.203450 | -1.836207 | 1.385811  |
| F | -0.017177 | -1.792469 | -2.151386 |
| F | -0.580054 | -4.322775 | -2.665651 |
| F | -2.455943 | -5.677319 | -1.204465 |
| F | -3.756475 | -4.394922 | 0.827451  |
| C | -0.915126 | 0.235569  | 1.569873  |
| C | -0.345685 | -0.692729 | 2.435366  |
| C | 0.114446  | -0.385630 | 3.712212  |
| C | 0.016054  | 0.914841  | 4.180523  |
| C | -0.528900 | 1.887435  | 3.352227  |
| C | -0.963734 | 1.533014  | 2.082389  |
| F | -0.144709 | -1.978153 | 2.049098  |
| F | 0.690714  | -1.329835 | 4.474958  |
| F | 0.456244  | 1.232455  | 5.402820  |
| F | -0.612182 | 3.154182  | 3.780402  |
| F | -1.440996 | 2.543951  | 1.324144  |
| H | 0.494252  | 2.917316  | -0.183522 |
| H | 0.231597  | 5.216538  | -1.012026 |

|   |           |           |           |
|---|-----------|-----------|-----------|
| H | 2.223148  | 6.637904  | -1.415403 |
| H | 4.493125  | 5.745077  | -0.970516 |
| H | 4.774964  | 3.448873  | -0.132893 |
| H | 1.613506  | -1.538522 | 0.504425  |
| H | 5.080547  | 0.432279  | -1.187457 |
| H | 6.127508  | 0.725070  | -3.396943 |
| H | 4.747480  | 0.630108  | -5.457291 |
| H | 2.302298  | 0.232298  | -5.281684 |
| H | 1.252574  | -0.076904 | -3.072125 |
| H | 2.974038  | -1.597957 | 2.480774  |
| H | 5.031296  | -2.371106 | 3.595128  |
| H | 6.946858  | -3.189922 | 2.246309  |
| H | 6.776035  | -3.248572 | -0.227662 |
| H | 4.720539  | -2.463544 | -1.346334 |
| H | 1.392552  | 0.190695  | -0.803380 |
| H | -0.495089 | 0.683747  | -1.693542 |
| H | 2.220706  | -2.056125 | -1.063390 |
| H | 4.336678  | 1.083490  | 0.919875  |
| H | 2.040295  | 0.942265  | 1.731727  |

(C<sub>6</sub>F<sub>5</sub>)<sub>3</sub>OH<sup>-</sup>

Sum of electronic and thermal Free Energies= -2284.743465 Hartree/Particle

|   |           |           |           |
|---|-----------|-----------|-----------|
| C | 1.572983  | -2.039154 | -0.920264 |
| C | 0.435175  | -1.476078 | -0.339269 |
| C | -0.154370 | -2.259640 | 0.647889  |
| C | 0.305524  | -3.521271 | 1.011201  |
| C | 1.424145  | -4.047117 | 0.385463  |
| C | 2.066616  | -3.295831 | -0.586328 |
| B | -0.077780 | 0.015565  | -0.887553 |
| C | 1.051455  | 1.127584  | -0.339483 |
| C | 1.671106  | 2.078244  | -1.142483 |
| C | 2.653304  | 2.956036  | -0.695144 |
| C | 3.053294  | 2.910444  | 0.630155  |
| C | 2.453282  | 1.995303  | 1.483436  |
| C | 1.476742  | 1.142327  | 0.987764  |
| F | 1.321282  | 2.231474  | -2.449935 |
| F | 3.214723  | 3.852080  | -1.530206 |
| F | 4.001771  | 3.748594  | 1.086373  |
| F | 2.821316  | 1.955224  | 2.778311  |
| F | 0.909167  | 0.309849  | 1.888586  |
| F | -1.232460 | -1.821501 | 1.334762  |
| F | -0.318164 | -4.236977 | 1.968550  |
| F | 1.887264  | -5.265274 | 0.723905  |
| F | 3.169658  | -3.789537 | -1.185130 |

|   |           |           |           |
|---|-----------|-----------|-----------|
| F | 2.291239  | -1.362381 | -1.838587 |
| O | -0.125170 | -0.101475 | -2.339419 |
| C | -1.625626 | 0.417774  | -0.376431 |
| C | -2.679543 | -0.423271 | -0.742511 |
| C | -4.016846 | -0.135342 | -0.511334 |
| C | -4.360985 | 1.055072  | 0.115088  |
| C | -3.356608 | 1.926704  | 0.496383  |
| C | -2.026290 | 1.594682  | 0.245450  |
| F | -2.430455 | -1.603813 | -1.342921 |
| F | -4.989057 | -0.993309 | -0.880612 |
| F | -5.653040 | 1.355625  | 0.345478  |
| F | -3.677004 | 3.089418  | 1.100220  |
| F | -1.125050 | 2.524849  | 0.647661  |
| O | 0.009406  | 0.746288  | -2.762469 |

PhH<sub>2</sub>C-N<sup>+</sup>H(Ph) (SiH<sub>2</sub>Ph)

Sum of electronic and thermal Free Energies= -1080.035781 Hartree/Particle

|    |           |           |           |
|----|-----------|-----------|-----------|
| C  | -2.973143 | -0.220496 | 1.217587  |
| C  | -2.446388 | -1.126103 | 0.277937  |
| C  | -3.328983 | -1.778791 | -0.603941 |
| C  | -4.695533 | -1.521893 | -0.555393 |
| C  | -5.199218 | -0.616803 | 0.377095  |
| C  | -4.339786 | 0.031334  | 1.263812  |
| Si | -0.641897 | -1.498494 | 0.202334  |
| N  | 0.135505  | -0.210808 | -0.996555 |
| C  | 0.081576  | 1.184888  | -0.498931 |
| C  | 0.660664  | 1.529959  | 0.719430  |
| C  | 0.591911  | 2.855609  | 1.145133  |
| C  | -0.047780 | 3.816649  | 0.366140  |
| C  | -0.623790 | 3.456939  | -0.850306 |
| C  | -0.558987 | 2.137214  | -1.287806 |
| C  | 1.494135  | -0.606438 | -1.648137 |
| C  | 2.647000  | -0.757877 | -0.698954 |
| C  | 2.906973  | -1.990220 | -0.085600 |
| C  | 3.992826  | -2.136363 | 0.772674  |
| C  | 4.838925  | -1.055686 | 1.015317  |
| C  | 4.602687  | 0.167803  | 0.391296  |
| C  | 3.513867  | 0.315922  | -0.463048 |
| H  | -2.955055 | -2.503983 | -1.320253 |
| H  | -5.366686 | -2.033861 | -1.234531 |
| H  | -6.264587 | -0.422765 | 0.419397  |
| H  | -4.736636 | 0.726258  | 1.994174  |
| H  | -2.318540 | 0.285467  | 1.919071  |
| H  | 1.289672  | -1.541868 | -2.171050 |

|   |           |           |           |
|---|-----------|-----------|-----------|
| H | 1.168966  | 0.793281  | 1.325751  |
| H | 1.042716  | 3.132793  | 2.090159  |
| H | -0.098613 | 4.843685  | 0.706339  |
| H | -1.125283 | 4.198610  | -1.459549 |
| H | -1.012011 | 1.858279  | -2.234267 |
| H | 2.278127  | -2.848578 | -0.298049 |
| H | 4.188952  | -3.095709 | 1.236147  |
| H | 5.690637  | -1.172355 | 1.674818  |
| H | 5.272469  | 1.002448  | 0.560112  |
| H | 3.344216  | 1.266217  | -0.956966 |
| H | -0.520769 | -0.229906 | -1.782089 |
| H | 1.688563  | 0.172645  | -2.385793 |
| H | 0.111901  | -1.338942 | 1.453842  |
| H | -0.341756 | -2.751024 | -0.519885 |

#### B-TS5

Sum of electronic and thermal Free Energies= -3364.851046 Hartree/Particle

|    |           |           |           |
|----|-----------|-----------|-----------|
| C  | 2.502978  | -3.505122 | -1.865658 |
| C  | 1.370791  | -2.674159 | -1.820450 |
| C  | 0.123682  | -3.237016 | -2.146397 |
| C  | 0.010575  | -4.580106 | -2.492026 |
| C  | 1.143847  | -5.391076 | -2.513950 |
| C  | 2.389784  | -4.851835 | -2.202619 |
| Si | 1.548639  | -0.839222 | -1.489141 |
| N  | 2.600119  | -0.572786 | 0.658964  |
| C  | 3.738287  | -1.446499 | 0.809182  |
| C  | 4.906613  | -1.262698 | 0.063408  |
| C  | 5.964714  | -2.158702 | 0.206299  |
| C  | 5.867310  | -3.242560 | 1.075411  |
| C  | 4.699631  | -3.428534 | 1.812402  |
| C  | 3.641688  | -2.534432 | 1.683115  |
| C  | 2.788366  | 0.848816  | 1.143994  |
| C  | 3.746029  | 1.723993  | 0.369347  |
| C  | 3.369090  | 2.322692  | -0.837505 |
| C  | 4.246170  | 3.157715  | -1.523538 |
| C  | 5.513494  | 3.417286  | -1.004648 |
| C  | 5.894476  | 2.842434  | 0.205154  |
| C  | 5.014948  | 2.003729  | 0.885990  |
| O  | 0.078353  | -0.699071 | -0.294202 |
| B  | -1.177102 | 0.239232  | 0.026340  |
| C  | -2.546199 | -0.584337 | -0.405041 |
| C  | -2.673932 | -1.938597 | -0.103157 |
| C  | -3.799232 | -2.706523 | -0.362300 |
| C  | -4.905204 | -2.096415 | -0.937053 |



|   |           |           |           |
|---|-----------|-----------|-----------|
| C | -4.851627 | -0.741444 | -1.230986 |
| C | -3.694885 | -0.016766 | -0.960182 |
| F | -1.641611 | -2.591990 | 0.510433  |
| F | -3.829521 | -4.010173 | -0.058815 |
| F | -6.007354 | -2.803747 | -1.198049 |
| F | -5.915743 | -0.141300 | -1.775135 |
| F | -3.745605 | 1.290829  | -1.265687 |
| C | -1.307297 | 0.413246  | 1.668176  |
| C | -2.236474 | 1.323097  | 2.180479  |
| C | -2.492499 | 1.496663  | 3.532697  |
| C | -1.812088 | 0.719560  | 4.462391  |
| C | -0.893228 | -0.214312 | 4.012044  |
| C | -0.676045 | -0.347399 | 2.645109  |
| F | -2.938035 | 2.099414  | 1.333262  |
| F | 0.233006  | -1.318970 | 2.308197  |
| F | -0.229014 | -0.982241 | 4.885536  |
| F | -2.042532 | 0.868807  | 5.768929  |
| F | -3.386285 | 2.398927  | 3.949609  |
| C | -0.889413 | 1.618003  | -0.801407 |
| C | -0.374896 | 2.784044  | -0.236589 |
| C | -0.144342 | 3.955102  | -0.950773 |
| C | -0.418603 | 3.987607  | -2.309321 |
| C | -0.907010 | 2.845285  | -2.930392 |
| C | -1.124549 | 1.701940  | -2.175929 |
| F | -0.036953 | 2.830013  | 1.072782  |
| F | 0.353273  | 5.038384  | -0.343006 |
| F | -0.197557 | 5.098063  | -3.016943 |
| F | -1.151954 | 2.856335  | -4.245602 |
| F | -1.569484 | 0.624938  | -2.852498 |
| H | -0.765485 | -2.616837 | -2.151388 |
| H | -0.959822 | -4.993037 | -2.742958 |
| H | 1.055823  | -6.438965 | -2.778500 |
| H | 3.274506  | -5.478169 | -2.224077 |
| H | 3.480990  | -3.098985 | -1.635635 |
| H | 1.794001  | 1.296022  | 1.135096  |
| H | 4.991314  | -0.432388 | -0.621676 |
| H | 6.868686  | -2.006168 | -0.372238 |
| H | 6.693933  | -3.935671 | 1.178698  |
| H | 4.610157  | -4.267120 | 2.493087  |
| H | 2.735853  | -2.679628 | 2.263126  |
| H | 2.378192  | 2.149866  | -1.241851 |
| H | 3.935571  | 3.615169  | -2.455726 |
| H | 6.194268  | 4.073244  | -1.534989 |
| H | 6.873248  | 3.049820  | 0.622462  |

|   |           |           |           |
|---|-----------|-----------|-----------|
| H | 5.316842  | 1.560479  | 1.828848  |
| H | 1.868788  | -0.935077 | 1.262839  |
| H | -0.059952 | -1.551374 | 0.146818  |
| H | 3.115410  | 0.799731  | 2.187378  |
| H | 2.968161  | -0.524796 | -1.785978 |
| H | 0.845037  | 0.037205  | -2.444976 |

B-IM7

Sum of electronic and thermal Free Energies= -3364.895429 Hartree/Particle

|    |           |           |           |
|----|-----------|-----------|-----------|
| C  | -1.901890 | 3.336898  | -1.966462 |
| C  | -0.725986 | 2.780054  | -2.497963 |
| C  | 0.079553  | 3.573206  | -3.336094 |
| C  | -0.272095 | 4.888181  | -3.621482 |
| C  | -1.439994 | 5.426812  | -3.082476 |
| C  | -2.253989 | 4.651891  | -2.259359 |
| Si | -0.247816 | 1.025064  | -2.144600 |
| N  | -4.371622 | 0.087900  | 1.627738  |
| C  | -4.820552 | 1.203106  | 0.926460  |
| C  | -5.764518 | 1.106260  | -0.110660 |
| C  | -6.194085 | 2.249598  | -0.780068 |
| C  | -5.702749 | 3.508360  | -0.443695 |
| C  | -4.754076 | 3.607692  | 0.576248  |
| C  | -4.310936 | 2.476337  | 1.248110  |
| C  | -5.161627 | -1.134399 | 1.715970  |
| C  | -4.921378 | -2.143803 | 0.602588  |
| C  | -3.626925 | -2.435349 | 0.163630  |
| C  | -3.409025 | -3.414823 | -0.801403 |
| C  | -4.486060 | -4.112085 | -1.348311 |
| C  | -5.779944 | -3.824095 | -0.922949 |
| C  | -5.993212 | -2.846515 | 0.048082  |
| O  | 0.947145  | 1.108812  | -0.854659 |
| B  | 1.662061  | -0.066457 | 0.009098  |
| C  | 3.128699  | 0.546183  | 0.420130  |
| C  | 3.242290  | 1.860210  | 0.865053  |
| C  | 4.419876  | 2.450648  | 1.295680  |
| C  | 5.580392  | 1.688174  | 1.303532  |
| C  | 5.527492  | 0.366485  | 0.882719  |
| C  | 4.320613  | -0.177254 | 0.454045  |
| F  | 2.124979  | 2.654902  | 0.902778  |
| F  | 4.446659  | 3.724773  | 1.700976  |
| F  | 6.733156  | 2.221529  | 1.712632  |
| F  | 6.640444  | -0.373654 | 0.888976  |
| F  | 4.358807  | -1.462099 | 0.064144  |
| C  | 0.818360  | -0.288355 | 1.397484  |

|   |           |           |           |
|---|-----------|-----------|-----------|
| C | 1.258345  | -1.271534 | 2.285399  |
| C | 0.671729  | -1.527007 | 3.515570  |
| C | -0.418004 | -0.763652 | 3.915613  |
| C | -0.882427 | 0.235899  | 3.076575  |
| C | -0.267163 | 0.455494  | 1.848992  |
| F | 2.306001  | -2.044359 | 1.940501  |
| F | -0.791204 | 1.460944  | 1.102586  |
| F | -1.937700 | 0.981591  | 3.458921  |
| F | -1.009049 | -0.987174 | 5.091698  |
| F | 1.136842  | -2.493939 | 4.312142  |
| C | 1.668460  | -1.314892 | -1.036659 |
| C | 0.847639  | -2.439672 | -0.948323 |
| C | 0.876779  | -3.481388 | -1.869514 |
| C | 1.743683  | -3.418868 | -2.949821 |
| C | 2.568144  | -2.310097 | -3.095734 |
| C | 2.507294  | -1.293264 | -2.155025 |
| F | -0.054154 | -2.568495 | 0.045177  |
| F | 0.056684  | -4.531907 | -1.733932 |
| F | 1.776927  | -4.405269 | -3.845906 |
| F | 3.394451  | -2.227689 | -4.143898 |
| F | 3.302075  | -0.227782 | -2.376074 |
| H | 0.983188  | 3.160406  | -3.773960 |
| H | 0.357468  | 5.489342  | -4.267409 |
| H | -1.717537 | 6.450079  | -3.309630 |
| H | -3.167186 | 5.063113  | -1.846602 |
| H | -2.551105 | 2.750369  | -1.325232 |
| H | -4.905869 | -1.607372 | 2.669573  |
| H | -6.152410 | 0.139024  | -0.402187 |
| H | -6.926480 | 2.148959  | -1.573898 |
| H | -6.055918 | 4.394064  | -0.958515 |
| H | -4.360637 | 4.577905  | 0.861176  |
| H | -3.574904 | 2.566981  | 2.039553  |
| H | -2.788584 | -1.890319 | 0.581808  |
| H | -2.397702 | -3.644275 | -1.115746 |
| H | -4.315476 | -4.874648 | -2.099898 |
| H | -6.623977 | -4.358055 | -1.345519 |
| H | -7.004631 | -2.627901 | 0.377985  |
| H | -3.864512 | 0.319609  | 2.467251  |
| H | 0.976219  | 1.955773  | -0.378598 |
| H | -6.233889 | -0.902137 | 1.763638  |
| H | -1.358277 | 0.194680  | -1.645602 |
| H | 0.464988  | 0.411044  | -3.277926 |

Sum of electronic and thermal Free Energies= -2841.934007 Hartree/Particle

|   |           |           |           |
|---|-----------|-----------|-----------|
| C | -0.526771 | 0.207396  | 2.338860  |
| C | 0.365551  | -0.462915 | 1.511203  |
| C | 1.157971  | -1.411169 | 2.161288  |
| C | 1.075329  | -1.690291 | 3.516688  |
| C | 0.162027  | -0.992928 | 4.298235  |
| C | -0.645750 | -0.036904 | 3.703524  |
| B | 0.646129  | -0.176620 | -0.072428 |
| C | 0.260400  | -1.403077 | -1.107827 |
| C | 0.382685  | -1.179556 | -2.479422 |
| C | 0.074611  | -2.105189 | -3.462269 |
| C | -0.413683 | -3.348901 | -3.079955 |
| C | -0.580267 | -3.621005 | -1.731386 |
| C | -0.246757 | -2.657918 | -0.782621 |
| F | 0.838906  | 0.029796  | -2.916323 |
| F | 0.229330  | -1.815812 | -4.759442 |
| F | -0.734878 | -4.260429 | -4.001281 |
| F | -1.091394 | -4.798675 | -1.347461 |
| F | -0.495452 | -3.004085 | 0.498552  |
| F | 2.056050  | -2.121215 | 1.449514  |
| F | 1.859562  | -2.618925 | 4.077244  |
| F | 0.062307  | -1.244331 | 5.607213  |
| F | -1.532415 | 0.644395  | 4.442781  |
| F | -1.355573 | 1.156928  | 1.841860  |
| O | -0.229359 | 1.036002  | -0.583541 |
| C | 2.196584  | 0.363705  | -0.212107 |
| C | 2.549175  | 1.594397  | 0.347234  |
| C | 3.831837  | 2.124438  | 0.303184  |
| C | 4.844143  | 1.399693  | -0.310299 |
| C | 4.551893  | 0.161669  | -0.863581 |
| C | 3.252075  | -0.330008 | -0.803063 |
| F | 1.623488  | 2.341362  | 0.992667  |
| F | 4.101167  | 3.317435  | 0.851596  |
| F | 6.086686  | 1.888102  | -0.363403 |
| F | 5.522950  | -0.548578 | -1.450981 |
| F | 3.060248  | -1.543769 | -1.353220 |
| N | -2.507828 | 2.069877  | -0.573286 |
| C | -3.713879 | 1.681554  | -0.343962 |
| C | -4.151727 | 0.332932  | -0.018627 |
| C | -5.507834 | 0.155084  | 0.304644  |
| C | -5.995470 | -1.100740 | 0.644151  |
| C | -5.133683 | -2.195525 | 0.663376  |
| C | -3.784690 | -2.033538 | 0.339169  |
| C | -3.296380 | -0.781090 | -0.002344 |

|   |           |           |           |
|---|-----------|-----------|-----------|
| C | -2.258750 | 3.428910  | -0.928611 |
| C | -3.073898 | 4.112813  | -1.838358 |
| C | -2.790382 | 5.435640  | -2.163697 |
| C | -1.694643 | 6.079829  | -1.592908 |
| C | -0.873858 | 5.390915  | -0.701292 |
| C | -1.142632 | 4.066147  | -0.373234 |
| H | -1.308370 | 1.360208  | -0.483568 |
| H | -3.902045 | 3.601418  | -2.315331 |
| H | -3.419153 | 5.957659  | -2.875615 |
| H | -1.474466 | 7.108901  | -1.851161 |
| H | -0.016295 | 5.883603  | -0.258439 |
| H | -0.508260 | 3.529254  | 0.319849  |
| H | -4.507994 | 2.430702  | -0.374652 |
| H | 0.072716  | 1.272967  | -1.469986 |
| H | -2.254449 | -0.669114 | -0.263823 |
| H | -3.112964 | -2.882857 | 0.358076  |
| H | -5.509622 | -3.176535 | 0.929811  |
| H | -7.042090 | -1.225865 | 0.894612  |
| H | -6.176179 | 1.009600  | 0.293875  |

### CD-IM3

Sum of electronic and thermal Free Energies= -2841.935561 Hartree/Particle

|   |           |           |           |
|---|-----------|-----------|-----------|
| C | -0.720842 | 0.385162  | 2.199043  |
| C | 0.295240  | -0.267784 | 1.512507  |
| C | 1.149518  | -1.011527 | 2.329470  |
| C | 1.015705  | -1.115572 | 3.705662  |
| C | -0.022228 | -0.443421 | 4.339252  |
| C | -0.898449 | 0.311855  | 3.577587  |
| B | 0.632720  | -0.153735 | -0.094965 |
| C | 0.520494  | -1.595286 | -0.923599 |
| C | 0.758745  | -1.584429 | -2.298014 |
| C | 0.637441  | -2.684618 | -3.131222 |
| C | 0.221904  | -3.894667 | -2.589181 |
| C | -0.059380 | -3.960031 | -1.234469 |
| C | 0.091984  | -2.826441 | -0.439444 |
| F | 1.138410  | -0.421677 | -2.897438 |
| F | 0.897775  | -2.593926 | -4.442605 |
| F | 0.076199  | -4.972191 | -3.368129 |
| F | -0.511407 | -5.106410 | -0.701095 |
| F | -0.263619 | -2.988937 | 0.857360  |
| F | 2.169255  | -1.694517 | 1.771488  |
| F | 1.868409  | -1.854284 | 4.427908  |
| F | -0.175380 | -0.528412 | 5.665933  |
| F | -1.909513 | 0.966559  | 4.171435  |

|   |           |           |           |
|---|-----------|-----------|-----------|
| F | -1.636571 | 1.151344  | 1.546813  |
| O | -0.362160 | 0.760491  | -0.792468 |
| C | 2.135971  | 0.548949  | -0.203044 |
| C | 2.291398  | 1.881848  | 0.179163  |
| C | 3.493780  | 2.574184  | 0.125522  |
| C | 4.634179  | 1.916410  | -0.312150 |
| C | 4.543213  | 0.582783  | -0.681911 |
| C | 3.315393  | -0.068735 | -0.617063 |
| F | 1.234100  | 2.585555  | 0.658732  |
| F | 3.563887  | 3.862237  | 0.498579  |
| F | 5.805865  | 2.559670  | -0.372336 |
| F | 5.639781  | -0.065376 | -1.098610 |
| F | 3.327484  | -1.365289 | -0.983467 |
| N | -2.768846 | 1.866837  | -0.894694 |
| C | -3.928540 | 1.323670  | -0.687907 |
| C | -4.197812 | -0.040985 | -0.313654 |
| C | -5.540609 | -0.375436 | -0.046179 |
| C | -5.877682 | -1.660741 | 0.350436  |
| C | -4.878965 | -2.625061 | 0.485781  |
| C | -3.544585 | -2.307783 | 0.217684  |
| C | -3.199738 | -1.027421 | -0.185098 |
| C | -2.571403 | 3.221694  | -1.295346 |
| C | -3.507569 | 3.899661  | -2.081619 |
| C | -3.271666 | 5.225201  | -2.427423 |
| C | -2.106960 | 5.866019  | -2.005265 |
| C | -1.169445 | 5.173609  | -1.241701 |
| C | -1.390839 | 3.847278  | -0.885979 |
| H | -1.860319 | 1.326316  | -0.735469 |
| H | -4.390614 | 3.394202  | -2.454129 |
| H | -3.990330 | 5.751974  | -3.043746 |
| H | -1.926373 | 6.897532  | -2.283287 |
| H | -0.257962 | 5.661840  | -0.918681 |
| H | -0.670698 | 3.300071  | -0.292364 |
| H | -4.790238 | 1.976737  | -0.795730 |
| H | -0.029232 | 0.895730  | -1.686465 |
| H | -2.167295 | -0.789967 | -0.404119 |
| H | -2.772301 | -3.057283 | 0.334991  |
| H | -5.138096 | -3.629041 | 0.801354  |
| H | -6.910735 | -1.911642 | 0.557738  |
| H | -6.311816 | 0.380999  | -0.144801 |

PhHC=N<sup>+</sup>HPh

Sum of electronic and thermal Free Energies= -557.091258 Hartree/Particle

|   |          |          |           |
|---|----------|----------|-----------|
| C | 0.480744 | 0.462418 | -0.084365 |
|---|----------|----------|-----------|

|   |           |           |           |
|---|-----------|-----------|-----------|
| N | -0.482362 | -0.411507 | 0.044323  |
| H | -0.220795 | -1.388188 | 0.144372  |
| C | -1.890291 | -0.173527 | 0.036931  |
| C | -2.719536 | -1.244993 | -0.302404 |
| C | -2.421266 | 1.075642  | 0.365521  |
| C | -4.095697 | -1.054686 | -0.338033 |
| H | -2.294969 | -2.211612 | -0.552588 |
| C | -3.798839 | 1.251747  | 0.320999  |
| H | -1.785242 | 1.891552  | 0.686150  |
| C | -4.636168 | 0.193029  | -0.032531 |
| H | -4.743227 | -1.880179 | -0.605511 |
| H | -4.220587 | 2.214499  | 0.581377  |
| H | -5.708995 | 0.338548  | -0.057233 |
| C | 1.884245  | 0.187421  | -0.025609 |
| C | 2.420836  | -1.080363 | 0.293662  |
| C | 2.760409  | 1.256541  | -0.312659 |
| C | 3.790244  | -1.265916 | 0.310099  |
| H | 1.778445  | -1.917231 | 0.546207  |
| C | 4.132792  | 1.060711  | -0.295841 |
| H | 2.354942  | 2.233139  | -0.552493 |
| C | 4.646982  | -0.197982 | 0.013294  |
| H | 4.201840  | -2.235975 | 0.558890  |
| H | 4.800740  | 1.882709  | -0.519924 |
| H | 5.719354  | -0.352295 | 0.030312  |
| H | 0.168299  | 1.485339  | -0.264215 |

#### D-TS1

Sum of electronic and thermal Free Energies= -2843.130774 Hartree/Particle

|   |           |           |           |
|---|-----------|-----------|-----------|
| C | -3.275662 | -0.097545 | -2.115663 |
| N | -2.569756 | -1.138638 | -1.281816 |
| C | -2.688739 | -2.522201 | -1.720405 |
| C | -2.767907 | -3.525609 | -0.755659 |
| C | -2.830149 | -4.857475 | -1.152640 |
| C | -2.811500 | -5.190272 | -2.505622 |
| C | -2.724405 | -4.182946 | -3.462063 |
| C | -2.660471 | -2.845232 | -3.075598 |
| H | -2.627035 | 0.148018  | -2.956656 |
| H | -2.755531 | -3.270292 | 0.297954  |
| H | -2.890891 | -5.634179 | -0.399778 |
| H | -2.860678 | -6.228359 | -2.811480 |
| H | -2.703814 | -4.432766 | -4.516233 |
| H | -2.587675 | -2.071470 | -3.829591 |
| H | -2.922397 | -1.066917 | -0.328277 |
| H | -4.194420 | -0.542019 | -2.504856 |

|   |           |           |           |
|---|-----------|-----------|-----------|
| C | -3.579479 | 1.133259  | -1.298724 |
| C | -2.738052 | 2.247907  | -1.338832 |
| C | -4.707715 | 1.157938  | -0.469803 |
| C | -3.013149 | 3.364512  | -0.552707 |
| H | -1.864533 | 2.237099  | -1.980172 |
| C | -4.979632 | 2.272330  | 0.318692  |
| H | -5.382708 | 0.307138  | -0.448204 |
| C | -4.129043 | 3.376087  | 0.280391  |
| H | -2.348508 | 4.219081  | -0.582849 |
| H | -5.854529 | 2.281382  | 0.958254  |
| H | -4.334926 | 4.241047  | 0.899444  |
| O | -0.126445 | -0.711343 | -1.119615 |
| B | 0.720549  | -0.016808 | -0.035170 |
| C | 1.961985  | -1.047292 | 0.324978  |
| C | 2.659808  | -1.664784 | -0.708803 |
| C | 2.431989  | -1.351596 | 1.600041  |
| C | 3.729703  | -2.528658 | -0.529145 |
| C | 3.501132  | -2.210598 | 1.833933  |
| C | 4.153749  | -2.805653 | 0.763520  |
| C | -0.353320 | 0.205998  | 1.190461  |
| C | -0.797077 | 1.431500  | 1.682794  |
| C | -0.964294 | -0.903249 | 1.778009  |
| C | -1.763304 | 1.555323  | 2.678351  |
| C | -1.937777 | -0.826810 | 2.763611  |
| C | -2.341766 | 0.420168  | 3.222962  |
| C | 1.384506  | 1.366141  | -0.639911 |
| C | 1.157395  | 1.895969  | -1.905642 |
| C | 2.309777  | 2.079389  | 0.123111  |
| C | 1.780332  | 3.042421  | -2.388733 |
| C | 2.959267  | 3.223967  | -0.314373 |
| C | 2.693438  | 3.710502  | -1.588572 |
| H | 0.373343  | -0.923080 | -1.915314 |
| F | 4.350555  | -3.089970 | -1.575488 |
| F | 5.180855  | -3.635498 | 0.973248  |
| F | 3.906278  | -2.471352 | 3.083451  |
| F | 2.302363  | -1.417149 | -2.005610 |
| F | 1.858857  | -0.812799 | 2.692840  |
| F | -0.632148 | -2.152028 | 1.372664  |
| F | -2.500725 | -1.941100 | 3.259242  |
| F | -3.284615 | 0.521627  | 4.164457  |
| F | -2.159478 | 2.765747  | 3.093043  |
| F | -0.324766 | 2.594683  | 1.195782  |
| F | 3.829998  | 3.866090  | 0.473939  |
| F | 2.584709  | 1.671452  | 1.378313  |



|   |           |           |           |
|---|-----------|-----------|-----------|
| F | 3.304906  | 4.813106  | -2.033331 |
| F | 1.502521  | 3.503063  | -3.617493 |
| F | 0.272012  | 1.318585  | -2.767802 |
| H | -1.328331 | -0.870499 | -1.189836 |

D-IM4

Sum of electronic and thermal Free Energies= -2843.129201 Hartree/Particle

|   |           |           |           |
|---|-----------|-----------|-----------|
| C | 3.366323  | -0.331004 | -2.203743 |
| N | 2.765522  | 0.686970  | -1.244533 |
| C | 3.114135  | 2.083242  | -1.512469 |
| C | 3.846626  | 2.796071  | -0.569871 |
| C | 4.167149  | 4.127535  | -0.822581 |
| C | 3.757469  | 4.733437  | -2.007623 |
| C | 3.016622  | 4.009987  | -2.940056 |
| C | 2.688009  | 2.679403  | -2.695538 |
| H | 2.814767  | -0.238552 | -3.138870 |
| H | 4.139598  | 2.329535  | 0.364373  |
| H | 4.730717  | 4.689390  | -0.087730 |
| H | 4.006303  | 5.770011  | -2.200504 |
| H | 2.684313  | 4.481868  | -3.856760 |
| H | 2.099089  | 2.122912  | -3.414854 |
| H | 3.070566  | 0.443420  | -0.301465 |
| H | 4.400929  | -0.034190 | -2.379147 |
| C | 3.280712  | -1.724369 | -1.638711 |
| C | 2.110946  | -2.481016 | -1.768925 |
| C | 4.371678  | -2.260729 | -0.945734 |
| C | 2.034553  | -3.750914 | -1.204034 |
| H | 1.253998  | -2.071087 | -2.290950 |
| C | 4.292775  | -3.531327 | -0.381310 |
| H | 5.289207  | -1.687310 | -0.853521 |
| C | 3.121762  | -4.275456 | -0.507317 |
| H | 1.121438  | -4.325437 | -1.298822 |
| H | 5.142422  | -3.938452 | 0.154125  |
| H | 3.054515  | -5.260335 | -0.060635 |
| O | 0.237768  | 0.361969  | -1.238930 |
| B | -0.689157 | 0.043723  | -0.077806 |
| C | -1.487921 | 1.433435  | 0.359197  |
| C | -2.030916 | 2.243628  | -0.634480 |
| C | -1.724224 | 1.881607  | 1.656606  |
| C | -2.738741 | 3.412763  | -0.396491 |
| C | -2.428007 | 3.045843  | 1.948442  |
| C | -2.937416 | 3.819589  | 0.915590  |
| C | 0.343816  | -0.531044 | 1.077901  |
| C | 0.454180  | -1.856905 | 1.490206  |

|   |           |           |           |
|---|-----------|-----------|-----------|
| C | 1.293414  | 0.319287  | 1.643499  |
| C | 1.409004  | -2.304740 | 2.400676  |
| C | 2.267465  | -0.081196 | 2.547054  |
| C | 2.323237  | -1.412708 | 2.937190  |
| C | -1.854282 | -1.033043 | -0.545051 |
| C | -2.015081 | -1.552495 | -1.825528 |
| C | -2.829559 | -1.439263 | 0.365586  |
| C | -3.046483 | -2.414427 | -2.186650 |
| C | -3.875296 | -2.295452 | 0.055104  |
| C | -3.986632 | -2.787673 | -1.239435 |
| H | -0.261678 | 0.678618  | -1.997887 |
| F | -3.228397 | 4.144483  | -1.408223 |
| F | -3.613272 | 4.943750  | 1.179730  |
| F | -2.615698 | 3.431085  | 3.218200  |
| F | -1.893945 | 1.889799  | -1.947188 |
| F | -1.265352 | 1.192689  | 2.719998  |
| F | 1.332060  | 1.628011  | 1.281098  |
| F | 3.170104  | 0.797617  | 3.020224  |
| F | 3.259575  | -1.828603 | 3.796160  |
| F | 1.473135  | -3.600388 | 2.735083  |
| F | -0.350896 | -2.814857 | 0.991815  |
| F | -4.772152 | -2.655028 | 0.982917  |
| F | -2.759548 | -1.008981 | 1.642503  |
| F | -4.986555 | -3.614434 | -1.565909 |
| F | -3.139634 | -2.881280 | -3.441148 |
| F | -1.147437 | -1.243803 | -2.829921 |
| H | 1.649038  | 0.563547  | -1.232229 |

#### D-IM5

Sum of electronic and thermal Free Energies= -3399.840158 Hartree/Particle

|   |           |           |          |
|---|-----------|-----------|----------|
| C | -2.107830 | -0.971335 | 2.791902 |
| N | -1.806756 | 0.230478  | 1.896882 |
| C | -1.864035 | 1.507426  | 2.633576 |
| C | -3.096789 | 1.982401  | 3.074128 |
| C | -3.150223 | 3.184283  | 3.773979 |
| C | -1.981204 | 3.901404  | 4.026851 |
| C | -0.756920 | 3.415218  | 3.577059 |
| C | -0.691024 | 2.210686  | 2.877482 |
| H | -1.339643 | -0.945289 | 3.565424 |
| H | -4.004368 | 1.432543  | 2.859099 |
| H | -4.106474 | 3.562440  | 4.115390 |
| H | -2.027460 | 4.838209  | 4.569469 |
| H | 0.156035  | 3.969992  | 3.757454 |
| H | 0.256552  | 1.839467  | 2.513877 |

|   |           |           |           |
|---|-----------|-----------|-----------|
| H | -2.481945 | 0.279053  | 1.111024  |
| H | -3.070293 | -0.774574 | 3.261521  |
| C | -2.123211 | -2.296902 | 2.074249  |
| C | -0.930740 | -2.975761 | 1.795146  |
| C | -3.342385 | -2.892241 | 1.735617  |
| C | -0.960866 | -4.222031 | 1.177651  |
| H | 0.018631  | -2.519926 | 2.044675  |
| C | -3.370539 | -4.142863 | 1.123077  |
| H | -4.274596 | -2.382071 | 1.952260  |
| C | -2.180331 | -4.808473 | 0.842147  |
| H | -0.031004 | -4.734318 | 0.960192  |
| H | -4.322429 | -4.592871 | 0.867866  |
| H | -2.201027 | -5.781673 | 0.365095  |
| O | 0.797583  | -0.264590 | 1.311303  |
| B | 1.746122  | -0.326842 | 0.134356  |
| C | 1.981917  | 1.230685  | -0.416516 |
| C | 2.280319  | 2.228204  | 0.508540  |
| C | 1.904456  | 1.678731  | -1.733095 |
| C | 2.434322  | 3.571306  | 0.195070  |
| C | 2.060964  | 3.011473  | -2.098514 |
| C | 2.318784  | 3.967503  | -1.128886 |
| C | 0.975029  | -1.294319 | -0.966059 |
| C | 1.393202  | -2.536701 | -1.433918 |
| C | -0.274148 | -0.902948 | -1.438523 |
| C | 0.656193  | -3.311058 | -2.328183 |
| C | -1.035954 | -1.629311 | -2.337518 |
| C | -0.568094 | -2.854898 | -2.788495 |
| C | 3.239362  | -0.889043 | 0.578326  |
| C | 3.613850  | -1.306319 | 1.849408  |
| C | 4.276542  | -0.911478 | -0.354960 |
| C | 4.896768  | -1.718678 | 2.192718  |
| C | 5.571791  | -1.315071 | -0.067325 |
| C | 5.886998  | -1.722037 | 1.223391  |
| H | 1.293822  | -0.273834 | 2.133694  |
| F | 2.675371  | 4.482594  | 1.153365  |
| F | 2.425029  | 5.261866  | -1.464655 |
| F | 1.928417  | 3.391638  | -3.379700 |
| F | 2.425293  | 1.914257  | 1.826702  |
| F | 1.650289  | 0.825251  | -2.744235 |
| F | -0.812199 | 0.271013  | -1.013034 |
| F | -2.230098 | -1.169319 | -2.769577 |
| F | -1.294199 | -3.585388 | -3.643792 |
| F | 1.113170  | -4.505317 | -2.732414 |
| F | 2.553028  | -3.089265 | -1.022845 |

|   |           |           |           |
|---|-----------|-----------|-----------|
| F | 6.518478  | -1.321497 | -1.015163 |
| F | 4.027941  | -0.549922 | -1.630235 |
| F | 7.130050  | -2.113878 | 1.525527  |
| F | 5.181282  | -2.106113 | 3.444737  |
| F | 2.706032  | -1.332237 | 2.874379  |
| H | -0.827742 | 0.090845  | 1.503699  |
| N | -4.096111 | 0.788328  | -0.220919 |
| C | -3.887388 | 1.305452  | -1.375373 |
| C | -2.930798 | 2.378422  | -1.649502 |
| C | -2.435293 | 3.215142  | -0.639071 |
| C | -2.518893 | 2.586871  | -2.973272 |
| C | -1.536821 | 4.226904  | -0.949401 |
| H | -2.774642 | 3.075581  | 0.378989  |
| C | -1.603948 | 3.588188  | -3.278512 |
| H | -2.900143 | 1.942434  | -3.758070 |
| C | -1.112714 | 4.411142  | -2.266929 |
| H | -1.161697 | 4.874635  | -0.165585 |
| H | -1.268572 | 3.724637  | -4.299440 |
| H | -0.397818 | 5.190926  | -2.502046 |
| H | -4.463623 | 0.962770  | -2.242549 |
| C | -5.101429 | -0.207598 | -0.111167 |
| C | -6.034338 | -0.095294 | 0.928391  |
| C | -5.170410 | -1.307347 | -0.976524 |
| C | -7.036961 | -1.048029 | 1.080456  |
| H | -5.985678 | 0.765280  | 1.585867  |
| C | -6.172131 | -2.260953 | -0.812325 |
| H | -4.422239 | -1.427626 | -1.750280 |
| C | -7.109802 | -2.136225 | 0.210754  |
| H | -7.765554 | -0.938249 | 1.875921  |
| H | -6.213152 | -3.109512 | -1.485967 |
| H | -7.888755 | -2.879889 | 0.331805  |

#### D-TS2

Sum of electronic and thermal Free Energies= -3399.826865 Hartree/Particle

|   |           |           |          |
|---|-----------|-----------|----------|
| C | -2.561694 | -0.547790 | 2.746224 |
| N | -2.146176 | 0.540004  | 1.786904 |
| C | -1.998746 | 1.814740  | 2.466954 |
| C | -3.128029 | 2.479778  | 2.952237 |
| C | -2.991874 | 3.720541  | 3.570650 |
| C | -1.733929 | 4.306580  | 3.702089 |
| C | -0.609962 | 3.639842  | 3.219136 |
| C | -0.737812 | 2.393661  | 2.608735 |
| H | -1.806375 | -0.587685 | 3.539037 |
| H | -4.110630 | 2.032971  | 2.849937 |

|   |           |           |           |
|---|-----------|-----------|-----------|
| H | -3.871642 | 4.230618  | 3.946064  |
| H | -1.631671 | 5.273552  | 4.180462  |
| H | 0.375641  | 4.080968  | 3.313833  |
| H | 0.133091  | 1.869275  | 2.239236  |
| H | -3.031750 | 0.730120  | 0.670090  |
| H | -3.496114 | -0.233839 | 3.211382  |
| C | -2.737882 | -1.920917 | 2.136748  |
| C | -1.689003 | -2.562985 | 1.467734  |
| C | -3.940610 | -2.607924 | 2.324331  |
| C | -1.852884 | -3.859682 | 0.986261  |
| H | -0.742013 | -2.051500 | 1.334093  |
| C | -4.098874 | -3.909708 | 1.854391  |
| H | -4.759795 | -2.125030 | 2.846458  |
| C | -3.055143 | -4.537900 | 1.180233  |
| H | -1.031385 | -4.345926 | 0.472644  |
| H | -5.036356 | -4.429945 | 2.015013  |
| H | -3.174077 | -5.551366 | 0.813780  |
| O | 0.699163  | -0.321513 | 1.240954  |
| B | 1.734028  | -0.443444 | 0.165324  |
| C | 2.069905  | 1.091723  | -0.414470 |
| C | 2.353350  | 2.099476  | 0.505080  |
| C | 2.087995  | 1.510308  | -1.742325 |
| C | 2.574995  | 3.428327  | 0.169545  |
| C | 2.314449  | 2.827280  | -2.128075 |
| C | 2.551236  | 3.796822  | -1.166934 |
| C | 1.018010  | -1.416157 | -0.978948 |
| C | 1.417990  | -2.685259 | -1.388099 |
| C | -0.187001 | -0.999054 | -1.534930 |
| C | 0.700598  | -3.465517 | -2.295548 |
| C | -0.928674 | -1.732539 | -2.443740 |
| C | -0.484883 | -2.988000 | -2.830634 |
| C | 3.181131  | -1.035622 | 0.715563  |
| C | 3.465447  | -1.407418 | 2.023953  |
| C | 4.270445  | -1.127512 | -0.151241 |
| C | 4.713154  | -1.841732 | 2.459182  |
| C | 5.533152  | -1.555927 | 0.229424  |
| C | 5.758101  | -1.916474 | 1.552265  |
| H | 1.104980  | -0.416912 | 2.105595  |
| F | 2.786286  | 4.357023  | 1.119632  |
| F | 2.714870  | 5.081131  | -1.524911 |
| F | 2.261764  | 3.183486  | -3.424316 |
| F | 2.408489  | 1.815578  | 1.832331  |
| F | 1.858115  | 0.644033  | -2.750182 |
| F | -0.703946 | 0.209308  | -1.190764 |

|   |           |           |           |
|---|-----------|-----------|-----------|
| F | -2.094125 | -1.248696 | -2.939781 |
| F | -1.195579 | -3.724451 | -3.695040 |
| F | 1.138937  | -4.684623 | -2.642583 |
| F | 2.539859  | -3.257447 | -0.908847 |
| F | 6.534525  | -1.629810 | -0.658969 |
| F | 4.110436  | -0.809255 | -1.453281 |
| F | 6.968849  | -2.331375 | 1.944830  |
| F | 4.912752  | -2.182499 | 3.741303  |
| F | 2.501382  | -1.359950 | 2.990525  |
| H | -1.223987 | 0.276981  | 1.402941  |
| N | -3.788386 | 0.761037  | -0.279087 |
| C | -3.551947 | 1.329558  | -1.416979 |
| C | -2.579240 | 2.358096  | -1.719874 |
| C | -2.022217 | 3.205564  | -0.748781 |
| C | -2.220691 | 2.523560  | -3.069905 |
| C | -1.113251 | 4.183249  | -1.124222 |
| H | -2.316164 | 3.115670  | 0.287568  |
| C | -1.290857 | 3.486027  | -3.435180 |
| H | -2.650632 | 1.870120  | -3.820716 |
| C | -0.737692 | 4.318119  | -2.462218 |
| H | -0.687961 | 4.837689  | -0.373301 |
| H | -0.991132 | 3.587224  | -4.470728 |
| H | -0.008676 | 5.068388  | -2.744339 |
| H | -4.178463 | 1.016437  | -2.252212 |
| C | -4.889763 | -0.162609 | -0.190032 |
| C | -5.906394 | 0.103198  | 0.727459  |
| C | -4.944203 | -1.292547 | -1.005437 |
| C | -6.996557 | -0.758172 | 0.812060  |
| H | -5.856885 | 0.994538  | 1.341799  |
| C | -6.037792 | -2.149130 | -0.909788 |
| H | -4.130783 | -1.506153 | -1.687914 |
| C | -7.064688 | -1.883834 | -0.007032 |
| H | -7.795715 | -0.544171 | 1.512182  |
| H | -6.078501 | -3.031038 | -1.537763 |
| H | -7.914042 | -2.553289 | 0.061177  |

CD-TS3

Sum of electronic and thermal Free Energies= -3364.795223 Hartree/Particle

|   |          |           |           |
|---|----------|-----------|-----------|
| C | 3.179908 | 0.380423  | -1.701645 |
| N | 2.321678 | -0.718110 | -1.364461 |
| C | 2.350248 | -1.902456 | -2.152679 |
| C | 1.299256 | -2.818392 | -1.997667 |
| C | 1.307634 | -4.010965 | -2.707647 |
| C | 2.358383 | -4.322722 | -3.573006 |

|    |           |           |           |
|----|-----------|-----------|-----------|
| C  | 3.408238  | -3.424580 | -3.713314 |
| C  | 3.415005  | -2.220661 | -3.004802 |
| H  | 4.224495  | 0.248817  | -1.130505 |
| H  | 0.485858  | -2.578929 | -1.325081 |
| H  | 0.482369  | -4.702068 | -2.579626 |
| H  | 2.356677  | -5.254687 | -4.125386 |
| H  | 4.235230  | -3.651228 | -4.376838 |
| H  | 4.255374  | -1.549301 | -3.138365 |
| H  | 1.369227  | -0.476145 | -1.040148 |
| H  | 3.560585  | 0.323806  | -2.725516 |
| C  | 2.728317  | 1.773664  | -1.382086 |
| C  | 1.839123  | 2.064979  | -0.341308 |
| C  | 3.267215  | 2.822872  | -2.139781 |
| C  | 1.497194  | 3.386660  | -0.067817 |
| H  | 1.388694  | 1.271098  | 0.237790  |
| C  | 2.921646  | 4.140832  | -1.864569 |
| H  | 3.951094  | 2.605359  | -2.954098 |
| C  | 2.037751  | 4.424342  | -0.824457 |
| H  | 0.796153  | 3.599425  | 0.729567  |
| H  | 3.333840  | 4.943249  | -2.464921 |
| H  | 1.760273  | 5.449907  | -0.610827 |
| Si | 4.206468  | -0.842961 | 0.321950  |
| H  | 3.274692  | -0.091805 | 1.162895  |
| C  | 5.975999  | -0.455556 | 0.668660  |
| C  | 6.336473  | 0.707703  | 1.377858  |
| C  | 6.990784  | -1.337903 | 0.248147  |
| C  | 7.669873  | 0.972201  | 1.665581  |
| H  | 5.571242  | 1.400421  | 1.712844  |
| C  | 8.323310  | -1.070006 | 0.538490  |
| H  | 6.734898  | -2.240587 | -0.297730 |
| C  | 8.661003  | 0.084386  | 1.245289  |
| H  | 7.938680  | 1.864262  | 2.218838  |
| H  | 9.097489  | -1.757772 | 0.219349  |
| H  | 9.700567  | 0.291900  | 1.471983  |
| H  | 4.040469  | -2.240906 | -0.095363 |
| O  | -0.462073 | -0.389163 | -0.838136 |
| B  | -1.624925 | -0.030131 | 0.039914  |
| C  | -2.859287 | -1.125393 | -0.215736 |
| C  | -2.568923 | -2.490004 | -0.191894 |
| C  | -4.204516 | -0.832281 | -0.434887 |
| C  | -3.506333 | -3.491420 | -0.409808 |
| C  | -5.179381 | -1.801276 | -0.651408 |
| C  | -4.828337 | -3.142786 | -0.643492 |
| C  | -2.037181 | 1.527231  | -0.391367 |

|   |           |           |           |
|---|-----------|-----------|-----------|
| C | -1.914901 | 2.679196  | 0.375700  |
| C | -2.419032 | 1.768211  | -1.710425 |
| C | -2.182718 | 3.959288  | -0.101751 |
| C | -2.708727 | 3.018214  | -2.233549 |
| C | -2.590421 | 4.133284  | -1.413771 |
| C | -1.221313 | -0.189919 | 1.634620  |
| C | -0.002645 | -0.626691 | 2.133126  |
| C | -2.185021 | 0.035856  | 2.620004  |
| C | 0.269801  | -0.813508 | 3.484154  |
| C | -1.967439 | -0.141486 | 3.978843  |
| C | -0.722118 | -0.573484 | 4.419443  |
| H | -0.787357 | -0.379147 | -1.744139 |
| F | -3.148748 | -4.786761 | -0.387417 |
| F | -5.752496 | -4.089056 | -0.854034 |
| F | -6.456464 | -1.451995 | -0.867408 |
| F | -1.309584 | -2.920114 | 0.070597  |
| F | -4.644474 | 0.442031  | -0.447455 |
| F | -2.514554 | 0.722933  | -2.576295 |
| F | -3.081666 | 3.166702  | -3.513507 |
| F | -2.842597 | 5.358738  | -1.892631 |
| F | -2.005288 | 5.031996  | 0.689435  |
| F | -1.458540 | 2.631052  | 1.652299  |
| F | -2.937584 | 0.102379  | 4.870520  |
| F | -3.408465 | 0.472160  | 2.262436  |
| F | -0.483853 | -0.746137 | 5.725890  |
| F | 1.492380  | -1.218441 | 3.882666  |
| F | 1.049173  | -0.883332 | 1.304730  |

#### CD-IM4

Sum of electronic and thermal Free Energies= -3364.873173 Hartree/Particle

|   |           |           |           |
|---|-----------|-----------|-----------|
| C | -2.849216 | -0.755352 | -1.494574 |
| N | -2.607804 | 0.428045  | -0.559468 |
| C | -2.730379 | 1.744493  | -1.241093 |
| C | -1.850356 | 2.754719  | -0.854104 |
| C | -1.947617 | 4.010385  | -1.447012 |
| C | -2.916246 | 4.258953  | -2.416810 |
| C | -3.794052 | 3.245320  | -2.790160 |
| C | -3.710435 | 1.984035  | -2.201862 |
| H | -3.857393 | -0.662458 | -1.891286 |
| H | -1.083702 | 2.555984  | -0.117750 |
| H | -1.253781 | 4.787323  | -1.148912 |
| H | -2.984700 | 5.235632  | -2.880994 |
| H | -4.551746 | 3.428824  | -3.542656 |
| H | -4.411280 | 1.216669  | -2.498881 |



|    |           |           |           |
|----|-----------|-----------|-----------|
| H  | -1.586251 | 0.363766  | -0.293863 |
| H  | -2.142584 | -0.623839 | -2.316516 |
| C  | -2.688922 | -2.107785 | -0.841387 |
| C  | -1.465682 | -2.510208 | -0.295028 |
| C  | -3.763244 | -3.003394 | -0.836538 |
| C  | -1.327360 | -3.776012 | 0.266137  |
| H  | -0.622066 | -1.833261 | -0.317045 |
| C  | -3.622561 | -4.274226 | -0.282300 |
| H  | -4.710993 | -2.711576 | -1.277132 |
| C  | -2.405785 | -4.659633 | 0.275015  |
| H  | -0.371966 | -4.070034 | 0.684594  |
| H  | -4.460489 | -4.961901 | -0.290482 |
| H  | -2.294383 | -5.647319 | 0.707232  |
| Si | -3.657973 | 0.426581  | 1.029585  |
| H  | -3.348828 | -0.829486 | 1.724841  |
| C  | -5.465242 | 0.525995  | 0.583743  |
| C  | -6.263293 | -0.631327 | 0.607939  |
| C  | -6.086333 | 1.757839  | 0.309969  |
| C  | -7.629630 | -0.563312 | 0.346696  |
| H  | -5.817049 | -1.591360 | 0.843856  |
| C  | -7.451654 | 1.825739  | 0.048970  |
| H  | -5.502986 | 2.672117  | 0.305903  |
| C  | -8.223321 | 0.664798  | 0.063534  |
| H  | -8.230838 | -1.464948 | 0.373111  |
| H  | -7.915009 | 2.783715  | -0.157426 |
| H  | -9.287757 | 0.719334  | -0.134948 |
| H  | -3.186403 | 1.646789  | 1.702041  |
| O  | 0.155789  | 0.428024  | -0.562835 |
| B  | 1.522762  | 0.059279  | -0.021973 |
| C  | 2.533532  | 1.368808  | -0.221916 |
| C  | 2.112752  | 2.624809  | 0.215674  |
| C  | 3.813031  | 1.357581  | -0.776286 |
| C  | 2.856058  | 3.789673  | 0.080888  |
| C  | 4.598294  | 2.497120  | -0.923602 |
| C  | 4.115429  | 3.725339  | -0.497098 |
| C  | 1.991577  | -1.269285 | -0.911036 |
| C  | 2.216793  | -2.563824 | -0.454759 |
| C  | 2.055786  | -1.142080 | -2.298132 |
| C  | 2.517654  | -3.636416 | -1.290781 |
| C  | 2.359733  | -2.171899 | -3.173361 |
| C  | 2.598001  | -3.440696 | -2.659819 |
| C  | 1.449497  | -0.212677 | 1.600253  |
| C  | 0.322982  | -0.102043 | 2.400901  |
| C  | 2.620479  | -0.496991 | 2.305951  |

|   |           |           |           |
|---|-----------|-----------|-----------|
| C | 0.322448  | -0.266736 | 3.781876  |
| C | 2.676729  | -0.669720 | 3.681019  |
| C | 1.512097  | -0.552972 | 4.430668  |
| H | 0.299349  | 0.729349  | -1.466181 |
| F | 2.371813  | 4.968351  | 0.507221  |
| F | 4.854032  | 4.832505  | -0.637584 |
| F | 5.817361  | 2.420652  | -1.475463 |
| F | 0.911093  | 2.770738  | 0.832835  |
| F | 4.371623  | 0.210776  | -1.209081 |
| F | 1.804221  | 0.070586  | -2.867660 |
| F | 2.413959  | -1.964792 | -4.497158 |
| F | 2.881226  | -4.460441 | -3.478449 |
| F | 2.702224  | -4.863877 | -0.781479 |
| F | 2.104348  | -2.876901 | 0.857530  |
| F | 3.834487  | -0.949281 | 4.293755  |
| F | 3.780922  | -0.632428 | 1.634583  |
| F | 1.540021  | -0.716775 | 5.758410  |
| F | -0.817736 | -0.148461 | 4.483802  |
| F | -0.898734 | 0.183074  | 1.862922  |

#### CD-IM5

Sum of electronic and thermal Free Energies= -3364.875824 Hartree/Particle

|   |           |           |          |
|---|-----------|-----------|----------|
| C | -2.800221 | 1.498867  | 1.899761 |
| N | -2.433280 | 0.367176  | 0.932891 |
| C | -2.690377 | -0.950308 | 1.553262 |
| C | -1.619867 | -1.813505 | 1.764304 |
| C | -1.847128 | -3.064320 | 2.332961 |
| C | -3.134847 | -3.441886 | 2.703811 |
| C | -4.198870 | -2.564922 | 2.503536 |
| C | -3.983610 | -1.316473 | 1.924069 |
| H | -3.861438 | 1.395753  | 2.119268 |
| H | -0.618221 | -1.518023 | 1.490953 |
| H | -1.009589 | -3.735859 | 2.476963 |
| H | -3.309108 | -4.414111 | 3.149220 |
| H | -5.203045 | -2.850139 | 2.794201 |
| H | -4.819098 | -0.648045 | 1.761593 |
| H | -1.384886 | 0.429978  | 0.743346 |
| H | -2.237852 | 1.282046  | 2.809004 |
| C | -2.502577 | 2.889838  | 1.398350 |
| C | -3.542524 | 3.717886  | 0.963066 |
| C | -1.196917 | 3.394480  | 1.412201 |
| C | -3.280495 | 5.010703  | 0.515032 |
| H | -4.564387 | 3.354754  | 0.988167 |
| C | -0.931924 | 4.680591  | 0.950033 |

|    |           |           |           |
|----|-----------|-----------|-----------|
| H  | -0.388951 | 2.786851  | 1.800002  |
| C  | -1.972522 | 5.489211  | 0.496258  |
| H  | -4.096609 | 5.644109  | 0.186624  |
| H  | 0.087394  | 5.047542  | 0.949575  |
| H  | -1.765665 | 6.492328  | 0.141837  |
| Si | -3.023195 | 0.450139  | -0.872379 |
| H  | -2.475263 | 1.715906  | -1.381738 |
| C  | -4.880013 | 0.397632  | -1.049177 |
| C  | -5.614224 | 1.578368  | -1.255971 |
| C  | -5.567027 | -0.828924 | -1.097682 |
| C  | -6.989131 | 1.537843  | -1.474303 |
| H  | -5.106518 | 2.536541  | -1.263848 |
| C  | -6.940936 | -0.870062 | -1.315807 |
| H  | -5.025502 | -1.760323 | -0.972347 |
| C  | -7.653841 | 0.313809  | -1.498968 |
| H  | -7.538555 | 2.458313  | -1.635520 |
| H  | -7.453332 | -1.824549 | -1.353532 |
| H  | -8.723225 | 0.280914  | -1.674040 |
| H  | -2.398679 | -0.766711 | -1.412601 |
| O  | 0.039671  | 0.655312  | -0.079165 |
| B  | 1.342907  | -0.093945 | -0.210700 |
| C  | 0.907871  | -1.508468 | -0.945421 |
| C  | 0.365786  | -1.460985 | -2.231506 |
| C  | 0.935086  | -2.782062 | -0.386832 |
| C  | -0.093246 | -2.573020 | -2.922688 |
| C  | 0.484816  | -3.926129 | -1.039222 |
| C  | -0.028722 | -3.823432 | -2.321476 |
| C  | 2.086773  | -0.296781 | 1.267136  |
| C  | 3.344528  | -0.898172 | 1.342133  |
| C  | 1.603166  | 0.150087  | 2.491592  |
| C  | 4.071234  | -1.044362 | 2.514357  |
| C  | 2.291317  | 0.029957  | 3.695290  |
| C  | 3.539147  | -0.571060 | 3.707588  |
| C  | 2.403290  | 0.820403  | -1.118402 |
| C  | 2.550111  | 2.178727  | -0.852876 |
| C  | 3.235738  | 0.351518  | -2.134175 |
| C  | 3.413797  | 3.032011  | -1.522982 |
| C  | 4.122853  | 1.162976  | -2.835287 |
| C  | 4.213902  | 2.513571  | -2.530673 |
| H  | 0.220414  | 1.595785  | 0.010409  |
| F  | -0.608485 | -2.453493 | -4.155929 |
| F  | -0.475469 | -4.908760 | -2.964700 |
| F  | 0.518442  | -5.119271 | -0.425023 |
| F  | 0.257985  | -0.280284 | -2.877582 |

|   |          |           |           |
|---|----------|-----------|-----------|
| F | 1.362489 | -2.980478 | 0.884600  |
| F | 0.375886 | 0.744229  | 2.600987  |
| F | 1.755508 | 0.486888  | 4.838424  |
| F | 4.219869 | -0.699716 | 4.852308  |
| F | 5.272457 | -1.637041 | 2.512604  |
| F | 3.906636 | -1.397149 | 0.222822  |
| F | 4.892518 | 0.652451  | -3.805767 |
| F | 3.223473 | -0.943956 | -2.498226 |
| F | 5.059871 | 3.305715  | -3.199068 |
| F | 3.482170 | 4.334838  | -1.208059 |
| F | 1.800598 | 2.759401  | 0.137565  |

CD-TS4

Sum of electronic and thermal Free Energies= -3441.274207 Hartree/Particle

|    |           |           |           |
|----|-----------|-----------|-----------|
| C  | 2.920453  | 0.208464  | -2.031132 |
| N  | 1.877554  | -0.646820 | -2.091600 |
| C  | 1.985771  | -1.996760 | -2.492709 |
| C  | 0.829950  | -2.785743 | -2.421151 |
| C  | 0.871160  | -4.116240 | -2.814764 |
| C  | 2.057077  | -4.681321 | -3.283667 |
| C  | 3.206823  | -3.899061 | -3.346080 |
| C  | 3.181999  | -2.563369 | -2.951213 |
| H  | 3.733079  | -0.107749 | -0.907140 |
| H  | -0.083405 | -2.350355 | -2.038503 |
| H  | -0.031725 | -4.711946 | -2.747015 |
| H  | 2.085794  | -5.719880 | -3.591076 |
| H  | 4.137260  | -4.327340 | -3.701235 |
| H  | 4.098062  | -1.988568 | -3.000816 |
| H  | 0.989197  | -0.406309 | -1.625112 |
| H  | 3.726816  | -0.027826 | -2.719710 |
| C  | 2.716449  | 1.669432  | -1.856402 |
| C  | 3.738027  | 2.524479  | -2.293362 |
| C  | 1.570675  | 2.213829  | -1.264649 |
| C  | 3.615156  | 3.901880  | -2.150517 |
| H  | 4.629159  | 2.108226  | -2.752180 |
| C  | 1.453162  | 3.593887  | -1.124893 |
| H  | 0.761644  | 1.573371  | -0.933790 |
| C  | 2.470548  | 4.439188  | -1.563401 |
| H  | 4.405730  | 4.554115  | -2.502971 |
| H  | 0.560078  | 4.007944  | -0.673193 |
| H  | 2.369168  | 5.512647  | -1.453026 |
| Si | 4.104696  | -0.489126 | 0.673976  |
| H  | 3.216107  | 0.582774  | 1.161612  |
| O  | 4.213192  | -1.135520 | 2.823932  |

|   |           |           |           |
|---|-----------|-----------|-----------|
| H | 4.438337  | -0.479767 | 3.494227  |
| C | 5.934552  | -0.133183 | 0.659207  |
| C | 6.403571  | 1.186367  | 0.544532  |
| C | 6.874181  | -1.174585 | 0.730791  |
| C | 7.769487  | 1.455874  | 0.508609  |
| H | 5.700426  | 2.011152  | 0.483039  |
| C | 8.239399  | -0.904507 | 0.691771  |
| H | 6.539538  | -2.201978 | 0.828573  |
| C | 8.688226  | 0.410521  | 0.580660  |
| H | 8.116310  | 2.479653  | 0.424886  |
| H | 8.952777  | -1.718746 | 0.750696  |
| H | 9.751541  | 0.619982  | 0.551814  |
| H | 3.651801  | -1.882115 | 0.541502  |
| H | 3.374624  | -1.545295 | 3.090989  |
| O | -0.785608 | -0.139766 | -1.107135 |
| B | -1.804453 | 0.062873  | -0.019777 |
| C | -3.189195 | -0.771422 | -0.435283 |
| C | -3.086339 | -2.120473 | -0.776197 |
| C | -4.489857 | -0.271224 | -0.477119 |
| C | -4.157924 | -2.911658 | -1.169155 |
| C | -5.593994 | -1.025438 | -0.861946 |
| C | -5.428129 | -2.356250 | -1.215019 |
| C | -2.051442 | 1.710369  | 0.083946  |
| C | -1.850555 | 2.535891  | 1.185878  |
| C | -2.423572 | 2.392239  | -1.074603 |
| C | -2.032072 | 3.917708  | 1.156946  |
| C | -2.621044 | 3.761167  | -1.156155 |
| C | -2.422211 | 4.536161  | -0.020078 |
| C | -1.267440 | -0.597038 | 1.398451  |
| C | -0.007425 | -1.133704 | 1.626394  |
| C | -2.136949 | -0.699650 | 2.486721  |
| C | 0.360818  | -1.732842 | 2.825540  |
| C | -1.808543 | -1.288602 | 3.700456  |
| C | -0.536728 | -1.817206 | 3.874514  |
| H | -1.203988 | 0.132997  | -1.930386 |
| F | -3.978199 | -4.202696 | -1.493617 |
| F | -6.478952 | -3.096295 | -1.589099 |
| F | -6.818833 | -0.480109 | -0.890325 |
| F | -1.886949 | -2.750458 | -0.719989 |
| F | -4.756038 | 1.003619  | -0.127142 |
| F | -2.630683 | 1.692003  | -2.223031 |
| F | -2.989902 | 4.343630  | -2.305992 |
| F | -2.593212 | 5.863604  | -0.066998 |
| F | -1.819695 | 4.657257  | 2.256532  |

|   |           |           |          |
|---|-----------|-----------|----------|
| F | -1.449138 | 2.037310  | 2.376494 |
| F | -2.693545 | -1.345177 | 4.703277 |
| F | -3.374640 | -0.180122 | 2.399535 |
| F | -0.180821 | -2.389558 | 5.031159 |
| F | 1.612705  | -2.254189 | 2.985528 |
| F | 0.967932  | -1.089336 | 0.682481 |

CD-IM6

Sum of electronic and thermal Free Energies= -3441.314744 Hartree/Particle

|    |          |           |           |
|----|----------|-----------|-----------|
| C  | 2.770313 | 0.887550  | -1.786301 |
| N  | 2.536507 | -0.358340 | -0.944052 |
| C  | 2.669556 | -1.605842 | -1.728531 |
| C  | 1.711353 | -2.602377 | -1.546432 |
| C  | 1.827730 | -3.800556 | -2.246290 |
| C  | 2.891806 | -4.006595 | -3.120864 |
| C  | 3.848243 | -3.008842 | -3.288722 |
| C  | 3.746217 | -1.806687 | -2.590800 |
| H  | 3.777715 | 0.825866  | -2.190893 |
| H  | 0.880323 | -2.437754 | -0.873211 |
| H  | 1.076774 | -4.568426 | -2.102816 |
| H  | 2.975951 | -4.938208 | -3.667878 |
| H  | 4.682675 | -3.160629 | -3.963284 |
| H  | 4.509499 | -1.052029 | -2.721986 |
| H  | 1.530235 | -0.322229 | -0.657180 |
| H  | 2.067504 | 0.820384  | -2.620602 |
| C  | 2.608311 | 2.195402  | -1.045447 |
| C  | 3.661995 | 3.114405  | -1.036048 |
| C  | 1.404501 | 2.537065  | -0.419918 |
| C  | 3.522513 | 4.347577  | -0.401435 |
| H  | 4.594505 | 2.869495  | -1.533759 |
| C  | 1.269352 | 3.762720  | 0.225963  |
| H  | 0.573444 | 1.842802  | -0.441170 |
| C  | 2.327820 | 4.670303  | 0.236840  |
| H  | 4.344963 | 5.053898  | -0.409028 |
| H  | 0.332932 | 4.008573  | 0.712540  |
| H  | 2.216943 | 5.627369  | 0.733457  |
| Si | 3.531188 | -0.491563 | 0.737213  |
| H  | 3.044245 | 0.734653  | 1.371231  |
| O  | 3.982483 | -0.883671 | 3.230965  |
| H  | 4.355093 | -0.174898 | 3.766379  |
| C  | 5.350723 | -0.440695 | 0.328645  |
| C  | 6.072554 | 0.762447  | 0.398431  |
| C  | 6.048988 | -1.618365 | 0.012970  |
| C  | 7.442253 | 0.790964  | 0.144989  |

|   |           |           |           |
|---|-----------|-----------|-----------|
| H | 5.564017  | 1.684604  | 0.658912  |
| C | 7.417693  | -1.590926 | -0.240709 |
| H | 5.523038  | -2.565940 | -0.028316 |
| C | 8.114939  | -0.385644 | -0.178046 |
| H | 7.984413  | 1.727969  | 0.205736  |
| H | 7.941191  | -2.509666 | -0.479871 |
| H | 9.181518  | -0.365203 | -0.371852 |
| H | 3.043167  | -1.827236 | 1.081806  |
| H | 3.109839  | -1.055652 | 3.610469  |
| O | -0.338718 | -0.349804 | -0.751841 |
| B | -1.646766 | -0.061899 | -0.052369 |
| C | -2.714919 | -1.306428 | -0.352770 |
| C | -2.292357 | -2.624530 | -0.177541 |
| C | -4.048557 | -1.181868 | -0.741065 |
| C | -3.089609 | -3.738026 | -0.406796 |
| C | -4.887166 | -2.267682 | -0.974663 |
| C | -4.404135 | -3.557413 | -0.811431 |
| C | -2.153324 | 1.395803  | -0.681172 |
| C | -2.256750 | 2.618198  | -0.026596 |
| C | -2.378075 | 1.473231  | -2.055352 |
| C | -2.595018 | 3.809936  | -0.662409 |
| C | -2.726980 | 2.628829  | -2.735494 |
| C | -2.840576 | 3.817634  | -2.025638 |
| C | -1.441917 | -0.053922 | 1.585928  |
| C | -0.282889 | -0.406567 | 2.259842  |
| C | -2.520764 | 0.226227  | 2.427511  |
| C | -0.164844 | -0.441873 | 3.644080  |
| C | -2.455633 | 0.199095  | 3.813856  |
| C | -1.258135 | -0.136546 | 4.435306  |
| H | -0.556018 | -0.477587 | -1.681316 |
| F | -2.605297 | -4.979063 | -0.233215 |
| F | -5.195146 | -4.613335 | -1.036659 |
| F | -6.158177 | -2.080216 | -1.357202 |
| F | -1.034494 | -2.890054 | 0.259440  |
| F | -4.610519 | 0.030211  | -0.915586 |
| F | -2.245319 | 0.350470  | -2.814805 |
| F | -2.939963 | 2.617371  | -4.059195 |
| F | -3.160855 | 4.954707  | -2.654054 |
| F | -2.649468 | 4.957891  | 0.031573  |
| F | -1.973607 | 2.736194  | 1.293014  |
| F | -3.527698 | 0.493317  | 4.560012  |
| F | -3.709281 | 0.557463  | 1.890587  |
| F | -1.165326 | -0.165790 | 5.769524  |
| F | 1.014215  | -0.779838 | 4.225151  |

|   |          |           |          |
|---|----------|-----------|----------|
| F | 0.846078 | -0.756951 | 1.587583 |
|---|----------|-----------|----------|

CD-TS5

Sum of electronic and thermal Free Energies= -3922.735797 Hartree/Particle

|    |           |           |           |
|----|-----------|-----------|-----------|
| C  | -1.345212 | -0.543258 | -2.918694 |
| N  | -0.451399 | 0.451492  | -2.808285 |
| C  | -0.654849 | 1.761311  | -3.299928 |
| C  | 0.260602  | 2.748926  | -2.911295 |
| C  | 0.113411  | 4.050936  | -3.371663 |
| C  | -0.940879 | 4.390083  | -4.218569 |
| C  | -1.854500 | 3.409622  | -4.596782 |
| C  | -1.721600 | 2.100329  | -4.142473 |
| H  | -2.480637 | -0.255780 | -1.987299 |
| H  | 1.063855  | 2.486452  | -2.235477 |
| H  | 0.826668  | 4.803592  | -3.056302 |
| H  | -1.052223 | 5.406951  | -4.575834 |
| H  | -2.681642 | 3.660379  | -5.251121 |
| H  | -2.451991 | 1.364695  | -4.454026 |
| H  | 0.356252  | 0.349351  | -2.168353 |
| H  | -2.017771 | -0.463948 | -3.766149 |
| C  | -1.021874 | -1.937901 | -2.543869 |
| C  | -1.654245 | -2.966672 | -3.256186 |
| C  | -0.160330 | -2.263094 | -1.488334 |
| C  | -1.416383 | -4.298096 | -2.933209 |
| H  | -2.328888 | -2.721806 | -4.069851 |
| C  | 0.063560  | -3.596048 | -1.159639 |
| H  | 0.335401  | -1.483347 | -0.926432 |
| C  | -0.559162 | -4.613969 | -1.880808 |
| H  | -1.898265 | -5.085613 | -3.500874 |
| H  | 0.720672  | -3.837662 | -0.333933 |
| H  | -0.374978 | -5.650238 | -1.621821 |
| Si | -3.441643 | -0.000487 | -0.675271 |
| H  | -2.668394 | -0.934820 | 0.163024  |
| C  | -5.045364 | -0.625961 | -1.407088 |
| C  | -5.305158 | -2.005307 | -1.484297 |
| C  | -5.988503 | 0.259621  | -1.954182 |
| C  | -6.472639 | -2.481854 | -2.076636 |
| H  | -4.587657 | -2.715323 | -1.085619 |
| C  | -7.155074 | -0.217184 | -2.548562 |
| H  | -5.816980 | 1.329688  | -1.911904 |
| C  | -7.399861 | -1.587667 | -2.608985 |
| H  | -6.657049 | -3.549305 | -2.125580 |
| H  | -7.872850 | 0.481673  | -2.963409 |
| H  | -8.307844 | -1.957808 | -3.071645 |



|   |           |           |           |
|---|-----------|-----------|-----------|
| H | -3.219939 | 1.455500  | -0.637246 |
| O | 1.988501  | 0.453080  | -1.378059 |
| B | 2.769355  | 0.189855  | -0.125223 |
| C | 3.925849  | 1.378602  | 0.068929  |
| C | 3.550657  | 2.716897  | -0.057040 |
| C | 5.270917  | 1.190122  | 0.384225  |
| C | 4.425526  | 3.787876  | 0.071827  |
| C | 6.182164  | 2.231936  | 0.527924  |
| C | 5.758500  | 3.542428  | 0.366850  |
| C | 3.429021  | -1.327610 | -0.326255 |
| C | 3.128865  | -2.486301 | 0.379255  |
| C | 4.292456  | -1.532280 | -1.401807 |
| C | 3.664763  | -3.735543 | 0.079063  |
| C | 4.862357  | -2.749973 | -1.737556 |
| C | 4.543899  | -3.871505 | -0.982396 |
| C | 1.788194  | 0.327271  | 1.201008  |
| C | 0.459002  | 0.733236  | 1.202679  |
| C | 2.328595  | 0.138388  | 2.475285  |
| C | -0.276388 | 0.936653  | 2.364854  |
| C | 1.623678  | 0.307422  | 3.658890  |
| C | 0.298048  | 0.715631  | 3.602567  |
| H | 2.614539  | 0.435737  | -2.109334 |
| F | 3.993613  | 5.051682  | -0.074734 |
| F | 6.621835  | 4.557372  | 0.499173  |
| F | 7.466698  | 1.982290  | 0.822300  |
| F | 2.259262  | 3.046841  | -0.304676 |
| F | 5.773951  | -0.046346 | 0.573558  |
| F | 4.614205  | -0.481463 | -2.203845 |
| F | 5.696128  | -2.862107 | -2.781413 |
| F | 5.060403  | -5.067614 | -1.290723 |
| F | 3.296891  | -4.819819 | 0.784315  |
| F | 2.228348  | -2.479998 | 1.393212  |
| F | 2.198984  | 0.081271  | 4.847476  |
| F | 3.611183  | -0.250025 | 2.598518  |
| F | -0.420401 | 0.874305  | 4.725502  |
| F | -1.569737 | 1.345897  | 2.297524  |
| F | -0.226665 | 0.944354  | 0.050297  |
| N | -4.473871 | 0.528471  | 1.474426  |
| C | -5.230349 | 1.743610  | 1.396859  |
| C | -6.612793 | 1.730114  | 1.191176  |
| C | -7.310557 | 2.931400  | 1.078568  |
| C | -6.643943 | 4.150442  | 1.161468  |
| C | -5.264601 | 4.162130  | 1.362603  |
| C | -4.559383 | 2.969470  | 1.480908  |

|   |           |           |          |
|---|-----------|-----------|----------|
| C | -5.132770 | -0.619018 | 2.168743 |
| C | -4.126083 | -1.585659 | 2.751843 |
| C | -3.247482 | -1.170742 | 3.759977 |
| C | -2.319433 | -2.054745 | 4.302038 |
| C | -2.268448 | -3.374427 | 3.855334 |
| C | -3.149376 | -3.802473 | 2.865970 |
| C | -4.069755 | -2.911499 | 2.316506 |
| H | -5.772134 | -0.223697 | 2.966444 |
| H | -7.146613 | 0.792126  | 1.111180 |
| H | -8.383498 | 2.907997  | 0.924849 |
| H | -7.192001 | 5.081099  | 1.075310 |
| H | -4.731910 | 5.103280  | 1.435142 |
| H | -3.487897 | 2.984334  | 1.646916 |
| H | -3.282297 | -0.150659 | 4.128850 |
| H | -1.638743 | -1.710112 | 5.071493 |
| H | -1.545499 | -4.063020 | 4.276858 |
| H | -3.117380 | -4.828101 | 2.516398 |
| H | -4.751644 | -3.249613 | 1.543460 |
| H | -3.588317 | 0.721976  | 1.935128 |
| H | -5.777963 | -1.134585 | 1.455614 |

CD-IM7

Sum of electronic and thermal Free Energies= -3922.775807 Hartree/Particle

|   |           |           |           |
|---|-----------|-----------|-----------|
| C | 1.133060  | 0.889013  | -3.007904 |
| N | 1.273777  | -0.284427 | -2.053328 |
| C | 1.275683  | -1.583434 | -2.760166 |
| C | 0.501454  | -2.618852 | -2.237608 |
| C | 0.507674  | -3.862982 | -2.862801 |
| C | 1.281978  | -4.077461 | -4.000286 |
| C | 2.059144  | -3.040416 | -4.509080 |
| C | 2.064501  | -1.791313 | -3.890740 |
| H | 1.981207  | 0.862172  | -3.687942 |
| H | -0.107135 | -2.448791 | -1.359414 |
| H | -0.101411 | -4.660086 | -2.453083 |
| H | 1.280492  | -5.045607 | -4.487102 |
| H | 2.669076  | -3.197530 | -5.390984 |
| H | 2.688428  | -1.004779 | -4.292499 |
| H | 0.401381  | -0.290652 | -1.477661 |
| H | 0.229750  | 0.694248  | -3.592439 |
| C | 1.064180  | 2.251145  | -2.354106 |
| C | 1.922162  | 3.262864  | -2.796770 |
| C | 0.112254  | 2.551439  | -1.374189 |
| C | 1.839342  | 4.548349  | -2.264592 |
| H | 2.652397  | 3.048834  | -3.570399 |

|    |           |           |           |
|----|-----------|-----------|-----------|
| C  | 0.039720  | 3.830855  | -0.830709 |
| H  | -0.578041 | 1.785279  | -1.043640 |
| C  | 0.901764  | 4.832234  | -1.275139 |
| H  | 2.504215  | 5.324966  | -2.625662 |
| H  | -0.698430 | 4.044158  | -0.066857 |
| H  | 0.835355  | 5.830178  | -0.857342 |
| Si | 2.749095  | -0.214889 | -0.738789 |
| H  | 2.343933  | 1.003895  | -0.035181 |
| C  | 4.320371  | -0.048418 | -1.736085 |
| C  | 4.849533  | 1.213800  | -2.055874 |
| C  | 5.030805  | -1.189214 | -2.147042 |
| C  | 6.038004  | 1.332226  | -2.773841 |
| H  | 4.329680  | 2.112383  | -1.742153 |
| C  | 6.219389  | -1.071565 | -2.864132 |
| H  | 4.659082  | -2.177288 | -1.900716 |
| C  | 6.722811  | 0.188641  | -3.180897 |
| H  | 6.430497  | 2.314531  | -3.012388 |
| H  | 6.753892  | -1.963485 | -3.171030 |
| H  | 7.648391  | 0.279598  | -3.738299 |
| H  | 2.501493  | -1.563375 | -0.226920 |
| O  | -1.417440 | -0.455333 | -1.024955 |
| B  | -2.495980 | -0.195487 | -0.002851 |
| C  | -3.518475 | -1.512201 | 0.066081  |
| C  | -2.975147 | -2.792949 | 0.172456  |
| C  | -4.912844 | -1.482872 | 0.065563  |
| C  | -3.727094 | -3.959068 | 0.226619  |
| C  | -5.707365 | -2.623903 | 0.125968  |
| C  | -5.111365 | -3.873797 | 0.202046  |
| C  | -3.257542 | 1.190971  | -0.527571 |
| C  | -3.254908 | 2.445199  | 0.072513  |
| C  | -3.864110 | 1.169767  | -1.783023 |
| C  | -3.838892 | 3.574952  | -0.494329 |
| C  | -4.467951 | 2.260404  | -2.387768 |
| C  | -4.457805 | 3.483999  | -1.730142 |
| C  | -1.845191 | -0.078667 | 1.509785  |
| C  | -0.527191 | -0.343836 | 1.851825  |
| C  | -2.667939 | 0.201461  | 2.603252  |
| C  | -0.039971 | -0.304969 | 3.152866  |
| C  | -2.227479 | 0.256105  | 3.918286  |
| C  | -0.890330 | 0.002655  | 4.199760  |
| H  | -1.871577 | -0.655363 | -1.850260 |
| F  | -3.130072 | -5.159897 | 0.311214  |
| F  | -5.859999 | -4.982227 | 0.255807  |
| F  | -7.044526 | -2.527918 | 0.110421  |

|   |           |           |           |
|---|-----------|-----------|-----------|
| F | -1.630605 | -2.965032 | 0.248994  |
| F | -5.582975 | -0.315527 | 0.004533  |
| F | -3.874591 | 0.009997  | -2.496777 |
| F | -5.043419 | 2.154400  | -3.594372 |
| F | -5.018290 | 4.561248  | -2.292809 |
| F | -3.773032 | 4.760606  | 0.132813  |
| F | -2.618862 | 2.661208  | 1.248990  |
| F | -3.070548 | 0.549209  | 4.916837  |
| F | -3.975489 | 0.448291  | 2.400334  |
| F | -0.433562 | 0.053202  | 5.457279  |
| F | 1.264369  | -0.574760 | 3.403449  |
| F | 0.398512  | -0.675642 | 0.911961  |
| N | 4.108936  | -0.409007 | 1.534717  |
| C | 4.616873  | -1.734067 | 1.637310  |
| C | 5.933972  | -2.043657 | 1.279254  |
| C | 6.384171  | -3.360991 | 1.346156  |
| C | 5.535387  | -4.383405 | 1.760326  |
| C | 4.222279  | -4.075846 | 2.114243  |
| C | 3.763871  | -2.764749 | 2.056117  |
| C | 5.043162  | 0.702887  | 1.851051  |
| C | 4.310901  | 1.947389  | 2.301923  |
| C | 3.560182  | 1.937932  | 3.483988  |
| C | 2.893560  | 3.082207  | 3.911341  |
| C | 2.978287  | 4.259246  | 3.169057  |
| C | 3.731702  | 4.283416  | 1.998890  |
| C | 4.390832  | 3.133074  | 1.568593  |
| H | 5.735548  | 0.378897  | 2.638486  |
| H | 6.606864  | -1.265490 | 0.942485  |
| H | 7.408989  | -3.584183 | 1.070830  |
| H | 5.891944  | -5.405207 | 1.812368  |
| H | 3.549586  | -4.858588 | 2.445879  |
| H | 2.745680  | -2.529362 | 2.346053  |
| H | 3.494208  | 1.032460  | 4.078506  |
| H | 2.312253  | 3.055466  | 4.825820  |
| H | 2.460336  | 5.150914  | 3.502921  |
| H | 3.803158  | 5.194847  | 1.416570  |
| H | 4.976078  | 3.157485  | 0.655567  |
| H | 3.267923  | -0.320429 | 2.097702  |
| H | 5.641196  | 0.926474  | 0.965085  |

CD-TS6

Sum of electronic and thermal Free Energies= -3364.849382 Hartree/Particle

|   |          |           |          |
|---|----------|-----------|----------|
| C | 3.347653 | -1.564016 | 1.628719 |
| N | 2.648368 | -0.310720 | 1.189630 |

|    |           |           |           |
|----|-----------|-----------|-----------|
| C  | 3.299833  | 0.927963  | 1.576161  |
| C  | 2.500944  | 2.059102  | 1.771683  |
| C  | 3.082215  | 3.273210  | 2.117900  |
| C  | 4.463541  | 3.372757  | 2.278520  |
| C  | 5.255489  | 2.243842  | 2.095698  |
| C  | 4.681785  | 1.021323  | 1.745705  |
| H  | 4.171808  | -1.749338 | 0.940813  |
| H  | 1.425725  | 1.990238  | 1.665400  |
| H  | 2.448089  | 4.140135  | 2.262182  |
| H  | 4.915253  | 4.319430  | 2.549746  |
| H  | 6.329749  | 2.305646  | 2.226510  |
| H  | 5.317468  | 0.158337  | 1.602005  |
| H  | 1.726660  | -0.295648 | 1.619325  |
| H  | 3.768001  | -1.387375 | 2.623296  |
| C  | 2.418828  | -2.757223 | 1.671093  |
| C  | 2.469754  | -3.745905 | 0.682503  |
| C  | 1.514711  | -2.911126 | 2.730327  |
| C  | 1.619326  | -4.849139 | 0.735872  |
| H  | 3.187895  | -3.657912 | -0.123624 |
| C  | 0.663869  | -4.010895 | 2.782251  |
| H  | 1.470833  | -2.166960 | 3.517593  |
| C  | 0.710710  | -4.980117 | 1.781703  |
| H  | 1.668827  | -5.605094 | -0.039263 |
| H  | -0.033492 | -4.111770 | 3.605658  |
| H  | 0.042818  | -5.832588 | 1.818722  |
| Si | 1.949357  | -0.267662 | -1.029433 |
| H  | 1.196459  | -0.989136 | -2.088982 |
| C  | 3.672620  | -0.883462 | -1.548748 |
| C  | 3.783869  | -2.091438 | -2.256447 |
| C  | 4.823980  | -0.084242 | -1.439870 |
| C  | 4.999043  | -2.509846 | -2.795063 |
| H  | 2.901781  | -2.705573 | -2.409677 |
| C  | 6.038428  | -0.490564 | -1.990131 |
| H  | 4.770734  | 0.878386  | -0.946241 |
| C  | 6.131620  | -1.710280 | -2.657642 |
| H  | 5.057840  | -3.448102 | -3.335708 |
| H  | 6.909032  | 0.151010  | -1.907877 |
| H  | 7.076518  | -2.026206 | -3.085397 |
| H  | 1.958925  | 1.197591  | -1.114880 |
| O  | 0.317567  | -0.380272 | 0.022710  |
| B  | -1.117680 | 0.274096  | -0.221508 |
| C  | -0.812467 | 1.727848  | -0.909882 |
| C  | -0.574608 | 1.885372  | -2.277275 |
| C  | -0.693564 | 2.906355  | -0.172722 |

|   |           |           |           |
|---|-----------|-----------|-----------|
| C | -0.291304 | 3.102670  | -2.880720 |
| C | -0.403679 | 4.145536  | -0.731908 |
| C | -0.211891 | 4.248225  | -2.100794 |
| C | -1.879336 | 0.397824  | 1.244030  |
| C | -3.202766 | 0.843550  | 1.280619  |
| C | -1.361833 | 0.081244  | 2.494899  |
| C | -3.958203 | 0.951284  | 2.440478  |
| C | -2.076635 | 0.164800  | 3.683950  |
| C | -3.391226 | 0.602022  | 3.658748  |
| C | -2.006809 | -0.800540 | -1.115306 |
| C | -1.934921 | -2.163484 | -0.836596 |
| C | -2.939447 | -0.476902 | -2.103092 |
| C | -2.667196 | -3.148754 | -1.480983 |
| C | -3.701602 | -1.426084 | -2.777132 |
| C | -3.563749 | -2.772121 | -2.470128 |
| H | 0.166339  | -1.284719 | 0.340672  |
| F | -0.073786 | 3.179313  | -4.198948 |
| F | 0.068718  | 5.428374  | -2.658438 |
| F | -0.290175 | 5.232826  | 0.043662  |
| F | -0.560313 | 0.812378  | -3.092396 |
| F | -0.812059 | 2.900418  | 1.175798  |
| F | -0.067837 | -0.328446 | 2.645027  |
| F | -1.501685 | -0.170346 | 4.848173  |
| F | -4.098750 | 0.691807  | 4.788335  |
| F | -5.221610 | 1.388608  | 2.395818  |
| F | -3.809372 | 1.220833  | 0.138880  |
| F | -4.571985 | -1.050846 | -3.721382 |
| F | -3.161076 | 0.798982  | -2.458045 |
| F | -4.288108 | -3.692772 | -3.112410 |
| F | -2.523264 | -4.440534 | -1.154687 |
| F | -1.099907 | -2.610491 | 0.155248  |

#### CD-IM8

Sum of electronic and thermal Free Energies= -3364.895669 Hartree/Particle

|   |          |           |           |
|---|----------|-----------|-----------|
| C | 5.611076 | -0.668326 | -0.302027 |
| N | 4.218619 | -0.918037 | -0.644704 |
| C | 3.672335 | -2.192682 | -0.654232 |
| C | 2.385430 | -2.393503 | -1.194833 |
| C | 1.787736 | -3.645746 | -1.175999 |
| C | 2.448454 | -4.742843 | -0.616846 |
| C | 3.723175 | -4.557054 | -0.089410 |
| C | 4.336736 | -3.305242 | -0.106303 |
| H | 5.793122 | -1.062671 | 0.705380  |
| H | 1.857692 | -1.554561 | -1.635858 |

|    |           |           |           |
|----|-----------|-----------|-----------|
| H  | 0.797045  | -3.761962 | -1.600838 |
| H  | 1.983474  | -5.721246 | -0.608785 |
| H  | 4.261668  | -5.399013 | 0.332904  |
| H  | 5.335153  | -3.200276 | 0.297615  |
| H  | 3.837878  | -0.275781 | -1.324878 |
| H  | 6.302476  | -1.197675 | -0.974837 |
| C  | 5.930515  | 0.811906  | -0.316504 |
| C  | 5.091848  | 1.732913  | 0.321443  |
| C  | 7.087268  | 1.278716  | -0.944520 |
| C  | 5.408618  | 3.088023  | 0.333075  |
| H  | 4.185016  | 1.382668  | 0.800637  |
| C  | 7.408792  | 2.634861  | -0.929362 |
| H  | 7.740825  | 0.576474  | -1.452086 |
| C  | 6.569764  | 3.543293  | -0.290013 |
| H  | 4.748027  | 3.790276  | 0.829269  |
| H  | 8.310066  | 2.980481  | -1.423210 |
| H  | 6.815177  | 4.599248  | -0.280852 |
| Si | -0.888519 | -1.820346 | 2.081446  |
| H  | -2.091967 | -1.356558 | 2.796041  |
| C  | 0.614292  | -1.898995 | 3.164153  |
| C  | 0.687124  | -1.143166 | 4.348356  |
| C  | 1.688736  | -2.744308 | 2.834328  |
| C  | 1.802313  | -1.228163 | 5.175444  |
| H  | -0.125794 | -0.479109 | 4.620547  |
| C  | 2.804494  | -2.824014 | 3.663180  |
| H  | 1.663346  | -3.339556 | 1.927391  |
| C  | 2.860293  | -2.069163 | 4.832947  |
| H  | 1.846473  | -0.640416 | 6.085136  |
| H  | 3.626928  | -3.475348 | 3.392377  |
| H  | 3.728576  | -2.135529 | 5.479093  |
| H  | -1.117103 | -3.074867 | 1.343327  |
| O  | -0.565336 | -0.607324 | 0.848945  |
| B  | -1.601010 | 0.239932  | -0.070304 |
| C  | -2.809336 | -0.828122 | -0.301364 |
| C  | -4.091217 | -0.727355 | 0.241298  |
| C  | -2.590484 | -1.973747 | -1.072091 |
| C  | -5.091174 | -1.668391 | 0.015010  |
| C  | -3.555645 | -2.938041 | -1.317237 |
| C  | -4.823018 | -2.779484 | -0.770784 |
| C  | -0.743951 | 0.630940  | -1.417071 |
| C  | -1.259392 | 0.643232  | -2.713633 |
| C  | 0.582754  | 1.039253  | -1.325396 |
| C  | -0.512692 | 1.016171  | -3.827326 |
| C  | 1.373244  | 1.397756  | -2.405506 |

|   |           |           |           |
|---|-----------|-----------|-----------|
| C | 0.816170  | 1.387932  | -3.676749 |
| C | -1.983751 | 1.626787  | 0.713177  |
| C | -1.499603 | 2.054497  | 1.945135  |
| C | -2.833427 | 2.535967  | 0.080818  |
| C | -1.831951 | 3.274847  | 2.524461  |
| C | -3.193905 | 3.762525  | 0.617156  |
| C | -2.685519 | 4.137506  | 1.855018  |
| H | 0.290807  | -0.155835 | 0.933258  |
| F | -6.303121 | -1.516832 | 0.559855  |
| F | -5.768743 | -3.693680 | -0.990240 |
| F | -3.278738 | -4.013287 | -2.063492 |
| F | -4.427141 | 0.298462  | 1.043857  |
| F | -1.375822 | -2.192318 | -1.620482 |
| F | 1.191215  | 1.087961  | -0.097286 |
| F | 2.664241  | 1.723131  | -2.236611 |
| F | 1.549812  | 1.728261  | -4.737309 |
| F | -1.060919 | 1.005030  | -5.045619 |
| F | -2.528149 | 0.277346  | -2.954140 |
| F | -4.021198 | 4.582613  | -0.039184 |
| F | -3.364027 | 2.215735  | -1.115755 |
| F | -3.016009 | 5.314028  | 2.392543  |
| F | -1.330640 | 3.619733  | 3.717338  |
| F | -0.649518 | 1.281440  | 2.673664  |

[Me<sub>2</sub>NH<sub>2</sub>]<sup>+</sup>(C<sub>6</sub>F<sub>5</sub>)<sub>3</sub>B-OH<sup>-</sup>

Sum of electronic and thermal Free Energies= -2420.367202 Hartree/Particle

|   |           |           |           |
|---|-----------|-----------|-----------|
| B | -0.033332 | 0.134095  | 0.518446  |
| C | -1.613864 | 0.588762  | 0.372996  |
| C | -2.171464 | 0.771717  | -0.893318 |
| C | -2.510166 | 0.778964  | 1.417222  |
| C | -3.498955 | 1.106742  | -1.115542 |
| C | -3.849149 | 1.113529  | 1.252049  |
| C | -4.349647 | 1.276655  | -0.030020 |
| C | 0.144589  | -1.268598 | -0.361508 |
| C | -0.413063 | -2.455980 | 0.111927  |
| C | 0.779443  | -1.390449 | -1.598197 |
| C | -0.324511 | -3.678799 | -0.541672 |
| C | 0.880352  | -2.590611 | -2.296538 |
| C | 0.329592  | -3.747464 | -1.763338 |
| C | 1.051215  | 1.309624  | 0.096349  |
| C | 0.768537  | 2.625115  | -0.261075 |
| C | 2.410710  | 1.034518  | 0.203377  |
| C | 1.751633  | 3.583259  | -0.503789 |
| C | 3.426281  | 1.948393  | -0.017593 |



|   |           |           |           |
|---|-----------|-----------|-----------|
| C | 3.090431  | 3.246032  | -0.381158 |
| F | 1.510914  | -2.642700 | -3.476306 |
| F | 0.430350  | -4.911147 | -2.413582 |
| F | -0.853862 | -4.786809 | 0.003384  |
| F | -1.088562 | -2.474709 | 1.292558  |
| F | 1.341205  | -0.324512 | -2.194282 |
| F | -4.651189 | 1.276506  | 2.312935  |
| F | -5.633245 | 1.597689  | -0.219780 |
| F | -2.104160 | 0.649038  | 2.720013  |
| F | -1.391387 | 0.647734  | -1.985619 |
| F | -3.967700 | 1.271692  | -2.358442 |
| F | 2.821537  | -0.226369 | 0.552157  |
| F | 4.715032  | 1.597435  | 0.123507  |
| F | 4.045533  | 4.155714  | -0.600634 |
| F | 1.412816  | 4.833546  | -0.842917 |
| F | -0.501318 | 3.060142  | -0.380542 |
| O | 0.315236  | -0.194687 | 1.964306  |
| H | 1.245470  | -1.219583 | 2.359452  |
| H | -0.406376 | 0.023205  | 2.560983  |
| H | 2.395675  | -2.279059 | 1.732816  |
| N | 2.008014  | -1.988647 | 2.630533  |
| C | 1.353602  | -3.144230 | 3.299726  |
| H | 0.908328  | -2.797275 | 4.231814  |
| H | 0.567788  | -3.529569 | 2.654109  |
| H | 2.088101  | -3.921546 | 3.512750  |
| C | 3.080640  | -1.344479 | 3.435247  |
| H | 3.529632  | -0.555113 | 2.837662  |
| H | 2.633833  | -0.918136 | 4.332748  |
| H | 3.835316  | -2.080822 | 3.714313  |

Me<sub>2</sub>NH

Sum of electronic and thermal Free Energies= -135.138900 Hartree/Particle

|   |           |           |           |
|---|-----------|-----------|-----------|
| H | -0.000234 | 1.329011  | 0.517241  |
| N | -0.000049 | 0.563942  | -0.148655 |
| C | 1.215566  | -0.222502 | 0.020295  |
| H | 1.283158  | -0.965931 | -0.780333 |
| H | 2.089768  | 0.428006  | -0.061080 |
| H | 1.275338  | -0.764987 | 0.981392  |
| C | -1.215555 | -0.222567 | 0.020307  |
| H | -1.275366 | -0.764830 | 0.981504  |
| H | -2.089878 | 0.427712  | -0.061563 |
| H | -1.282503 | -0.966158 | -0.780188 |

[Me<sub>2</sub>NH<sub>2</sub>]<sup>+</sup>

Sum of electronic and thermal Free Energies= -135.493828 Hartree/Particle

|   |           |           |           |
|---|-----------|-----------|-----------|
| H | 0.000018  | 1.159241  | 0.816065  |
| N | 0.000058  | 0.540855  | 0.000007  |
| H | 0.000041  | 1.159234  | -0.816117 |
| C | 1.267963  | -0.276169 | -0.000002 |
| H | 1.276863  | -0.896385 | -0.894126 |
| H | 2.120956  | 0.400164  | 0.001905  |
| H | 1.275093  | -0.899118 | 0.892237  |
| C | -1.268050 | -0.276171 | -0.000002 |
| H | -1.276605 | -0.896720 | 0.893885  |
| H | -2.120916 | 0.400308  | -0.001327 |
| H | -1.275332 | -0.898668 | -0.892545 |
